# Supplementary material for: Conformational modulation of peptides using β-amino benzenesulfonic acid (SAnt)
Source: Royal Society of Chemistry journal article supplement (doi:10.1039/c4ob02421d), 2014-12-02
Supplement: c4ob02421d1.pdf [file c4ob02421d1.pdf]

## Electronic Supplementary Information

### Conformational modulation of peptides using $\beta$ -amino benzenesulfonic acid ( $^S$ Ant)

Gowri Priya,<sup>a</sup> Amol S. Kotmale,<sup>b</sup> Rupesh L. Gawade,<sup>c</sup> Vedavati G. Puranik,<sup>c</sup> Pattuparambil R. Rajamohanan,<sup>b</sup> and Gangadhar J. Sanjayan\*,<sup>a</sup>

<sup>a</sup>Division of Organic Chemistry, <sup>b</sup>Central NMR Facility, National Chemical Laboratory, <sup>c</sup>Center for Materials Characterization, Dr. Homi Bhabha Road, Pune 411 008, India.

E-mail: [gj.sanjayan@ncl.res.in](mailto:gj.sanjayan@ncl.res.in); Web: <http://nclwebapps.ncl.res.in/gjsanjayan/index.html>

|                                                                                                 |         |
|-------------------------------------------------------------------------------------------------|---------|
| Contents                                                                                        | S1      |
| General methods                                                                                 | S2      |
| Synthetic Schemes and experimental procedures                                                   | S3-S14  |
| Crystal data                                                                                    | S15-S18 |
| Mass spectra of all new compounds                                                               | S18-S25 |
| <sup>1</sup> H NMR spectra of all new compounds                                                 | S26-S33 |
| <sup>13</sup> C and <sup>13</sup> C-DEPT-135 spectra of all new compounds                       | S34-S48 |
| Titration studies of <b>1</b> , <b>2</b> , <b>3</b> , <b>4</b> , <b>6</b> & <b>7</b>            | S49-S54 |
| Variable Temperature studies of <b>1</b> , <b>2</b> , <b>3</b> , <b>4</b> , <b>6</b> & <b>7</b> | S55-S60 |
| 2D NMR Spectra of <b>3d</b> and <b>4d</b> (COSY, TOCSY, HSQC, HMBC and NOESY)                   | S61-80  |
| Molecular Dynamics                                                                              | S81-S85 |

## General Methods.

Unless otherwise stated, all chemicals and reagents were obtained commercially. Dry solvents were prepared by the standard procedures. Analytical thin layer chromatography was done on pre-coated silica gel plates (Kieselgel 60F<sub>254</sub>, Merck). Column chromatographic purifications were done with 100-200 mesh silica gel. NMR spectra were recorded in CDCl<sub>3</sub> on AV 200 MHz, AV 400 MHz or AV 500 MHz spectrometers. All chemical shifts are reported in  $\delta$  ppm downfield to TMS and peak multiplicities are referred to as singlet (s), doublet (d), quartet (q), broad singlet (bs), and multiplet (m). The titration studies were done in CDCl<sub>3</sub>. IR spectra were recorded in CHCl<sub>3</sub> using Shimadzu FTIR-8400 spectrophotometer. Melting points were determined on a Buchi melting point B-540 instrument. HRMS data were recorded on a Thermo Scientific Q-Exactive, Accela 1250 pump.

**Scheme 1:**

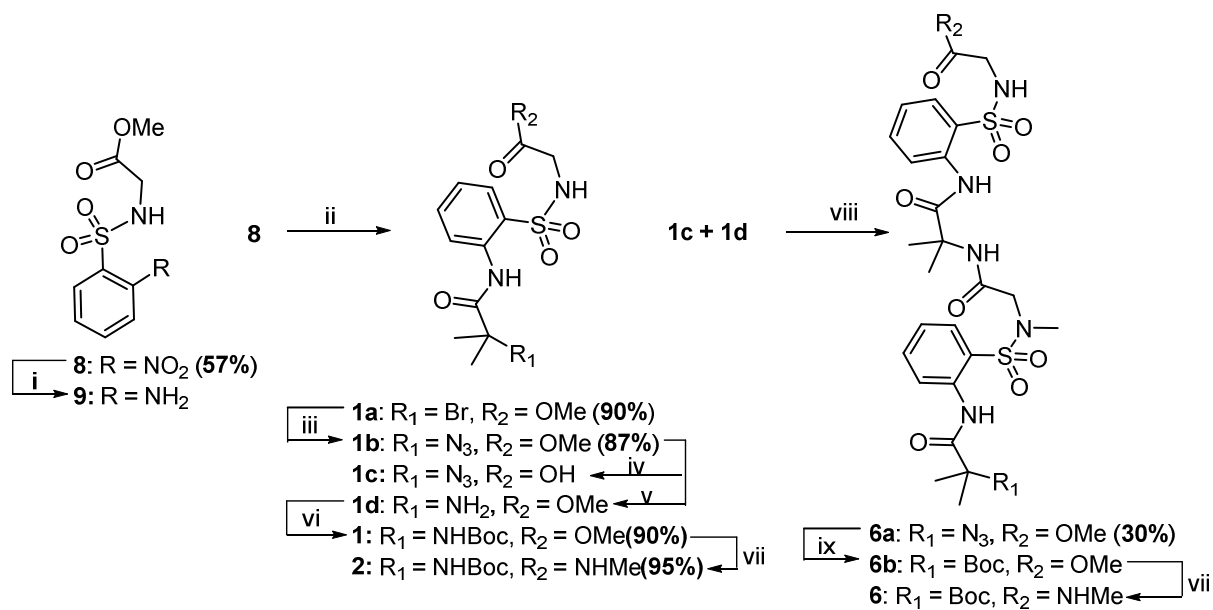

**Reagents and conditions:** (i) Pd/C, MeOH, H<sub>2</sub>, 60 psi, 12h; (ii) 2-bromo-2-methyl isopropyl bromide, DIPEA, DCM, rt, 8 h; (iii) NaN<sub>3</sub>, DMF, 80<sup>0</sup>C, 12h; (iv) LiOH.H<sub>2</sub>O, MeOH, rt, 12h; (v) Pd/C, MeOH, 60 psi, 5h; (vi) (Boc)<sub>2</sub>O, Et<sub>3</sub>N, rt, 12h; (vii) methanolic CH<sub>3</sub>NH<sub>2</sub>, MeOH, 12h; (viii) HBTU, DIPEA, CH<sub>3</sub>CN, rt, 72 h; (ix) Pd/C, DIPEA, (Boc)<sub>2</sub>O, MeOH, H<sub>2</sub>, 60 psi, 48 h.

**Scheme 2:**

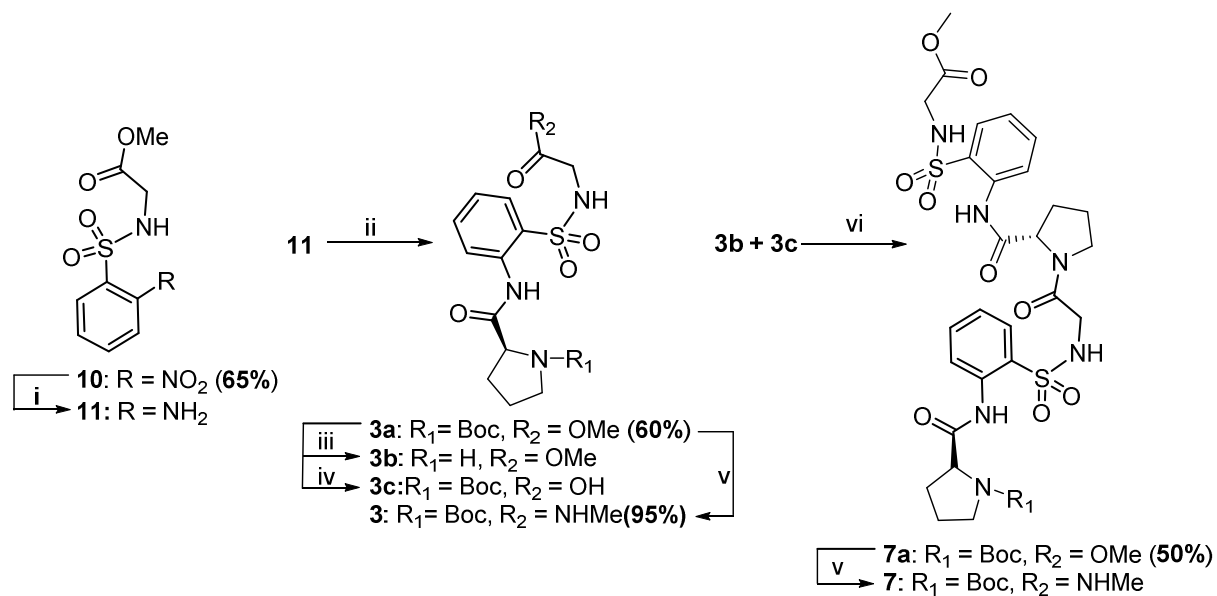

**Reagents and conditions:** (i) Pd/C, MeOH, H<sub>2</sub>, 60 psi, 12h; (ii) Boc-Pro-OH, ethyl chloroformate, Et<sub>3</sub>N, THF, 80 °C, 48 h; (iii) TFA, DCM (1:1); (iv) LiOH.H<sub>2</sub>O, MeOH; (v) methanolic CH<sub>3</sub>NH<sub>2</sub>, MeOH, 12h; (vi) EDC.HCl, HOBt, Et<sub>3</sub>N, DCM, rt, 12 h;

**Scheme 3:**

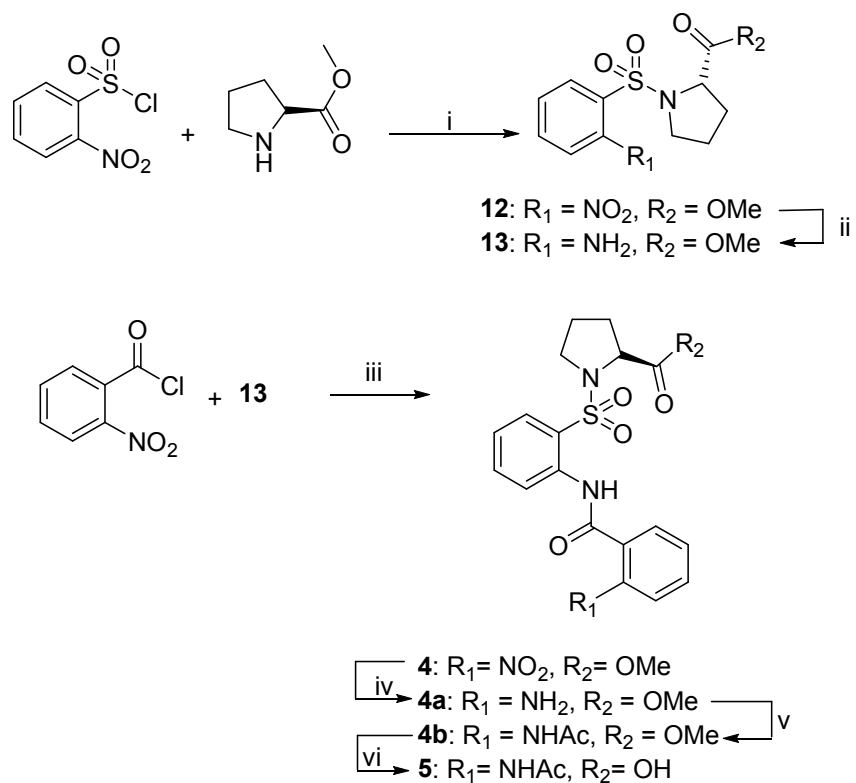

**Reagents and conditions:** (i)  $\text{Et}_3\text{N}$ , DCM, rt, 5h; (ii) Pd/C, MeOH, 60 psi, 6h; (iii)  $\text{Et}_3\text{N}$ , DCM, 8h; (iv) Pd/C, MeOH, 60 psi, 6h; (v) Py,  $\text{Ac}_2\text{O}$ , DCM, 6h; (vi)  $\text{LiOH}\cdot\text{H}_2\text{O}$ , MeOH, rt, 5h.

## Synthetic Procedures:

### Reduction of nitro **8**, **10**, **12** and **4** & azido compounds **1c**, **6a** and **4** to amines **9**, **11**, **13** & **1d**, **6b** and **4a**, respectively:

#### General procedure:

To the solutions of nitro compounds **8**, **10**, **12** and **4** & azido compounds **1c**, **6a** and **14** (0.5 g, 1.59 mmol) in methanol (15 mL), 10% Pd/C (0.06 g) was added. Then, the reaction mixture was subjected to hydrogenation in a parr shaker at 60 psi for 12 h. Later, the catalyst was filtered through celite and the solvent was removed under reduced pressure to get the products **9**, **11**, **13** & **1d**, **6b** and **4a**, which were carried forward to the next reaction without any purification. The amines obtained from the azido compounds were subjected to Boc protection *insitu*, wherever necessary, by adding (Boc)<sub>2</sub>O and Et<sub>3</sub>N to the reaction mixture.

### C-terminus amidation of esters **1**, **6b**, **3a**, **7a** to amides **2**, **6**, **3** and **7**, respectively:

The compounds **1**, **6b**, **3a** and **7a** were dissolved in MeOH (2 mL) followed by addition of methanolic methyl amine solution (2 mL) at 0 °C. The reaction was monitored by TLC and after completion, the solvent was stripped off. The crude products were purified by column chromatography which yielded the amide products **2**, **6**, **3**, and **7**, respectively.

### Hydrolysis of esters **1b**, **3b** and **4b** to acids **1c**, **3c** and **5**, respectively:

To the solutions of esters **1b**, **3b** and **4b** (10 mmol, 1 equiv) in methanol, LiOH·H<sub>2</sub>O (40 mmol, 4 equiv) was added in water (12 mL) at 0 °C and the reaction mixture was stirred for 12 h. After the complete consumption of the starting material, the solvent was evaporated under reduced pressure and the residue was treated with sat. KHSO<sub>4</sub> solution and was followed by extraction with DCM (2 X 25 mL). The corresponding acid derivatives **1c**, **3c** and **5**, respectively, obtained after evaporation of the solvent were taken for the next reaction without any purification.

### Boc deprotection of **3a** to **3b**:

The solution of **3a** (3 mmol) was subjected to deprotection using DCM/TFA (1:1, 5 mL) at 0°C. After completion of the reaction (~2 h), the solvent was stripped off. The amine **3b**, obtained after evaporation of the solvent was used for the next step without any purification.

### Methyl ((2-nitrophenyl)sulfonyl)glycinate **8**:

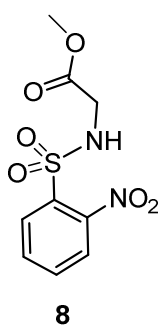

To a solution of glycine methyl ester hydrochloride in dry DCM (10 mL), Et<sub>3</sub>N (0.57 mL, 4 mmol) was added and stirred at 0 °C for 15 min. Then 2-nitrobenzenesulfonylchloride (0.3 g, 1.3 mmol) was added to the reaction mixture. The reaction mixture was allowed to attain room temperature and was further stirred for 12 h. Later, the reaction mixture was washed sequentially with sat. NaHCO<sub>3</sub>, dil. HCl and brine solutions. The organic layer was dried over anhydrous Na<sub>2</sub>SO<sub>4</sub> and evaporated under reduced pressure to get the crude product which on purification by column chromatography (eluent: pet ether/ethyl acetate: 60:40, R<sub>f</sub>: 0.5) yielded **8** (0.18 g, 50%); mp: 108-110 °C; IR (CHCl<sub>3</sub>) ν (cm<sup>-1</sup>): 3685, 3617, 3363, 3019, 2400, 1749, 1543, 1440, 161, 1218, 1171, 1046, 771, 668, 588; <sup>1</sup>H NMR (400 MHz, CDCl<sub>3</sub>) δ: 8.11-8.08 (m, 1H), 7.95-7.92 (m, 1H), 7.76-7.74 (m, 2H), 6.08-6.05 (t, *J* = 5.1 Hz, 1H), 4.03-4.01 (d, *J* = 5.8 Hz, 2H), 3.61 (s, 3H); <sup>13</sup>C NMR (100 MHz, CDCl<sub>3</sub>) δ: 169, 133.7, 132.9, 130.5, 125.6, 52.5, 44.7; HRMS: C<sub>9</sub>H<sub>10</sub>O<sub>6</sub>N<sub>2</sub>NaS, Calcd: 297.0152 Found: 297.0149.

### Methyl ((2-(2-bromo-2-methylpropanamido)phenyl)sulfonyl)glycinate **1a**:

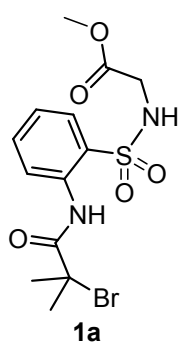

To a solution of amine **9** (0.17g, 0.7 mmol) in dry DCM at 0 °C, 2-bromo-2-methylpropanoyl bromide (0.09 mL, 0.7 mmol) was added followed by the addition of Et<sub>3</sub>N (0.12 mL, 0.8 mmol) and the reaction mixture was stirred for 12 h after attaining room temperature. Later, the reaction mixture was washed sequentially with sat. NaHCO<sub>3</sub> and brine solutions. The organic layer was dried over anhydrous Na<sub>2</sub>SO<sub>4</sub> and evaporated under reduced pressure to get the crude product which on purification by column chromatography (eluent: pet ether/ethyl acetate: 70:30, R<sub>f</sub>: 0.5) yielded **1a** (0.26 g, 97%); IR (CHCl<sub>3</sub>) ν (cm<sup>-1</sup>): 3331, 3022, 1745, 1700, 1586, 1528, 1438, 1332, 1218, 1154, 1113, 850, 771, 497; <sup>1</sup>H NMR (400 MHz,

CDCl<sub>3</sub>)  $\delta$ : 9.98 (s, 1H), 8.37-8.35 (d,  $J$  = 8.3 Hz, 1H), 7.95-7.93 (d,  $J$  = 8 Hz, 1H), 7.67-7.63 (t,  $J$  = 7.8 Hz, 1H), 7.31-7.29 (d,  $J$  = 6.3 Hz, 1H), 5.55-5.52 (t,  $J$  = 5.3 Hz, 1H), 4.18-4.13 (q, ethyl acetate), 3.81-3.8 (d,  $J$  = 5.5 Hz, 2H), 3.63 (s, 3H), 2.11 (s, 6H); <sup>13</sup>C NMR (100 MHz, CDCl<sub>3</sub>)  $\delta$ : 170.1, 168.5, 135.6, 134.3, 129.4, 126.8, 124.3, 123.2, 60.5, 60.4, 52.7, 43.8, 31.5, 21, 14.1; HRMS: C<sub>13</sub>H<sub>17</sub>O<sub>5</sub>N<sub>2</sub>BrNaS, Calcd: 416.9913 Found: 416.9909.

**Methyl ((2-(2-azido-2-methylpropanamido)phenyl)sulfonyl)glycinate **1b**:**

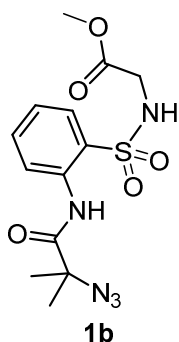

A solution of compound **1a** (0.36g, 0.9 mmol) and NaN<sub>3</sub> (0.18g, 2.9 mmol) in dry DMF was heated at 80 °C for 8h. Later, the reaction mixture was dissolved in ethyl acetate and washed with water and brine solutions sequentially to remove DMF. The organic layer was then dried over anhydrous Na<sub>2</sub>SO<sub>4</sub> and evaporated under reduced pressure to get the crude product which on purification by column chromatography (eluent: pet ether/ethyl acetate: 70:30, R<sub>f</sub>: 0.5) yielded **1b** (0.29 g, 89%); IR (CHCl<sub>3</sub>)  $\nu$  (cm<sup>-1</sup>): 3330, 3020, 2119, 1749, 1697, 1584, 1523, 1439, 1344, 1217, 1127, 771, 668, 460; <sup>1</sup>H NMR (400 MHz, CDCl<sub>3</sub>)

$\delta$ : 10.02 (s, 1H), 8.41-8.39 (d,  $J$  = 8 Hz, 1H), 7.94-7.92 (dd,  $J$  = 7.8 Hz,  $J$  = 1.5 Hz, 1H), 7.64-7.60 (t,  $J$  = 7 Hz, 1H), 7.30-7.25 (m, 1H), 5.5 (s, 1H), 3.8 (s, 2H), 3.63 (s, 3H), 1.68 (s, 6H); <sup>13</sup>C NMR (100 MHz, CDCl<sub>3</sub>)  $\delta$ : 171, 168.7, 135.4, 134.3, 129.4, 127.1, 124.2, 123, 64.7, 52.7, 43.7, 24.3; HRMS: C<sub>13</sub>H<sub>17</sub>O<sub>5</sub>N<sub>3</sub>NaS, Calcd: 378.0843 Found: 378.0842.

**Methyl-((2-(2-((tert-butoxycarbonyl)amino)-2-methylpropanamido)phenyl)sulfonyl)glycinate **1**:**

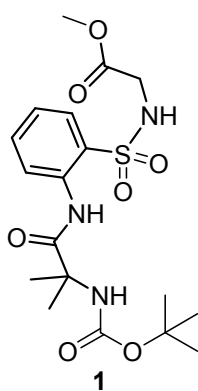

Compound **1** was isolated as a white solid; mp: 110-113 °C; IR (CHCl<sub>3</sub>)  $\nu$  (cm<sup>-1</sup>): 3356, 3020, 2400, 1698, 1583, 1514, 1439, 1336, 1218, 1128, 929, 771, 666, 476; <sup>1</sup>H NMR (500 MHz, CDCl<sub>3</sub>)  $\delta$ : 9.64 (s, 1H), 8.04-8.02 (d,  $J$  = 7.9 Hz, 1H), 7.86-7.85 (dd,  $J$  = 7.9 Hz,  $J$  = 1.2 Hz, 1H), 7.58-7.55 (t,  $J$  = 7.9 Hz, 1H), 7.22-7.19 (t,  $J$  = 7.9 Hz, 1H), 7.22-7.19 (t,  $J$  = 7.9 Hz, 1H), 6.93 (bs, 1H), 4.97 (s, 1H), 3.71-3.7 (d,  $J$  = 6.1 Hz, 2H), 3.47 (s, 3H), 1.6 (s, 6H), 1.5 (s, 9H); <sup>13</sup>C NMR (125 MHz, CDCl<sub>3</sub>)  $\delta$ : 172.8, 168.4, 156.1, 135.3, 133.4, 128.9, 124.1, 81.6, 57.7, 52.3, 44.1, 28.5, 25.5; HRMS: C<sub>18</sub>H<sub>27</sub>O<sub>7</sub>N<sub>3</sub>NaS, Calcd:

452.1462 Found: 452.1458



**tert-butyl-(2-methyl-1-((2-(N-(2-(methylamino)-2-oxoethyl)sulfamoyl)phenyl)amino)-1-oxopropan-2-yl)carbamate 2:**

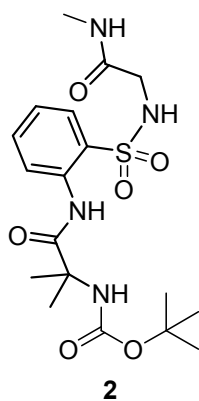

Compound **2** was isolated quantitatively according to the general method mentioned earlier (eluent: pet ether/ethyl acetate: 30:70, R<sub>f</sub>: 0.4); mp: 143-146 °C; IR (CHCl<sub>3</sub>)  $\nu$  (cm<sup>-1</sup>): 3683, 3620, 3439, 3376, 3217, 3020, 2400, 1682, 1582, 1503, 1337, 1217, 1159, 771, 669, 505; <sup>1</sup>H NMR (400 MHz, CDCl<sub>3</sub>)  $\delta$ : 9.28 (s, 1H), 7.83-7.81 (dd, *J* = 9 Hz, 1H), 7.54-7.50 (t, *J* = 8.2 Hz, 1H), 7.23-7.19 (t, *J* = 8 Hz, 1H), 6.99-6.96 (t, *J* = 6.2 Hz, 1H), 6.37 (bs, 1H), 5.14 (bs, 1H), 3.47-3.45 (d, *J* = 6.5 Hz, 2H), 2.58-2.57 (d, *J* = 4.8 Hz, 3H), 1.53 (s, 6H), 1.37 (s, 9H); <sup>13</sup>C NMR (100 MHz, CDCl<sub>3</sub>)  $\delta$ : 173.2, 168.2, 156.2, 134.8, 133.8, 129.7, 129.2, 125.1, 81.5, 57.3, 45.5, 28.3, 25.4; HRMS: C<sub>18</sub>H<sub>28</sub>O<sub>6</sub>N<sub>4</sub>NaS, Calcd: 451.1622 Found: 451.1617.

**Methyl-((2-(2-(2-((2-(2-azido-2-methylpropanamido)phenyl)sulfonamido)acetamido)-2-methylpropanamido)phenyl)sulfonyl)glycinate 6a:**

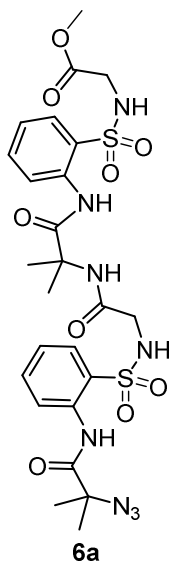

The acid **1c** (0.07 g, 0.2 mmol) was coupled with the amine **1b** (0.07 g, 0.2 mmol) using HBTU (0.1 g, 0.2 mmol), Et<sub>3</sub>N (0.05 mL, 0.3 mmol) and HOBT (0.006 g, 0.04 mmol) in dry CH<sub>3</sub>CN at 0 °C, the reaction mixture was allowed to attain room temperature and stirred for 72h. Later, the solvent in the reaction mixture was stripped off under reduced pressure; the residue obtained was dissolved in ethyl acetate and washed sequentially with sat. NaHCO<sub>3</sub>, brine and sat. KHSO<sub>4</sub> solutions. Then, the organic layer was dried over anhydrous Na<sub>2</sub>SO<sub>4</sub> and evaporated under reduced pressure to get the crude product which on purification by column chromatography (eluent: pet ether/ethyl acetate: 20:80, R<sub>f</sub>: 0.4) yielded **6a** (0.06 g, 40%); mp: 101-103 °C ; IR (CHCl<sub>3</sub>)  $\nu$  (cm<sup>-1</sup>): 3683, 3618, 3363, 3019, 2400, 2119, 1745, 1696, 1583, 1520, 1438, 1335, 1217, 1156, 928, 770, 668; <sup>1</sup>H NMR (400 MHz, CDCl<sub>3</sub>)  $\delta$ : 9.99 (s, 1H), 9.30 (s, 1H), 8.37-8.35 (d, *J* = 8.2 Hz, 1H), 8-7.98 (d, *J* = 8.2 Hz, 1H), 7.88-7.86 (d, *J* = 7.7 Hz, 1H), 7.72-7.7 (d, *J* = 7.7 Hz, 1H), 7.57-7.53 (t, *J* = 7.5 Hz, 1H), 7.51-7.47 (t, *J* = 7.5 Hz, 1H), 7.22-7.19 (t, *J* = 7.7 Hz, 1H), 7.14-7.11 (t, *J* = 7.7 Hz, 3.72 (s, 2H), 3.59 (s, 2H), 3.42 (s, 3H), 1.57 (s, 6H), 1.5 (s, 6H); <sup>13</sup>C NMR

(100 MHz, CDCl<sub>3</sub>)  $\delta$ : 171.5, 171.3, 170.6, 168.4, 165.7, 135.5, 134.5, 133.7, 129.5, 128.8, 128.5, 127.1, 124.7, 124.6, 124.2, 123.2, 64.7, 60.3, 58.3, 52.4, 46.5, 44, 38.5, 25.1, 24.4; HRMS: C<sub>25</sub>H<sub>33</sub>O<sub>9</sub>N<sub>8</sub>S, Calcd: 653.1806 Found: 653.1804; C<sub>25</sub>H<sub>33</sub>O<sub>9</sub>N<sub>8</sub>NaS, Calcd: 675.1626 Found: 675.1613.

**Methyl-((2-(2-(2-((2-(2-((tert-butoxycarbonyl)amino)-2-methylpropanamido)phenyl)sulfonamido)acetamido)-2-methylpropanamido)phenyl)sulfonyl)glycinate 6b:**

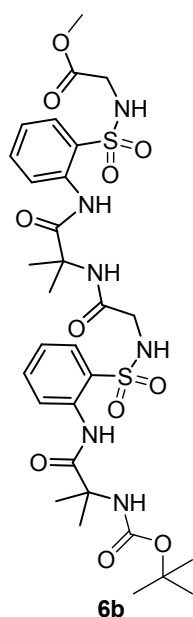

The Boc protected compound **6b** (0.15 g, 50%) was isolated as a white solid using the general method mentioned earlier; mp: 101-103 °C IR (CHCl<sub>3</sub>)  $\nu$  (cm<sup>-1</sup>): 3364, 3019, 2400, 1695, 1583, 1522, 1438, 1335, 1217, 1045, 929, 771, 669, 479; <sup>1</sup>H NMR (500 MHz, CDCl<sub>3</sub>)  $\delta$ : 10.1 (s, 1H), 9.56 (s, 1H), 8.67-8.66 (d, *J* = 8.2 Hz, 1H), 8.09-8.07 (d, *J* = 7.9 Hz, 1H), 7.83-7.81 (dd, *J* = 7.9 Hz, *J* = 1.5 Hz, 1H), 7.58-7.54 (m, 2H), 7.22-7.19 (m, 2H), 7.13-7.1 (m, 1H), 7.02-6.99 (m, 1H), 3.72-3.71 (m, 2H), 3.47-3.46 (m, 2H), 3.41 (s, 3H); <sup>13</sup>C NMR (100 MHz, CDCl<sub>3</sub>)  $\delta$ : 173.7, 169.1, 168.6, 154.6, 150.5, 138, 135.2, 133.5, 129, 128.9, 124.6, 124.1, 86, 58.1, 52.2, 49.7, 44.1, 28.2, 27.6, 25.3, 25.1; HRMS: C<sub>30</sub>H<sub>43</sub>O<sub>11</sub>N<sub>6</sub>S<sub>2</sub>, Calcd: 727.2426 Found: 727.2430.

**tert-butyl-(2-methyl-1-((2-(N-(2-((2-methyl-1-((2-(N-(2-(methylamino)-2-oxoethyl)sulfamoyl)phenyl)amino)-1-oxopropan-2-yl)amino)-2-oxoethyl)sulfamoyl)phenyl)amino)-1-oxopropan-2-yl)carbamate 4c:**

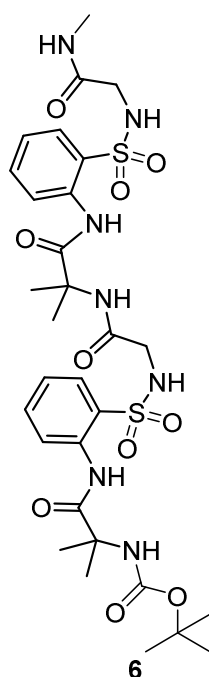

Compound **6** was isolated as a white solid using the general method mentioned earlier (eluent: pet ether/ethyl acetate: 30:70, *R<sub>f</sub>*: 0.4) quantitatively; mp: 168-171 °C; IR (CHCl<sub>3</sub>)  $\nu$  (cm<sup>-1</sup>): 3685, 3624, 3373, 3019, 2400, 1668, 1582, 1519, 1424, 1336, 1218, 1045, 929, 771, 668, 626; <sup>1</sup>H NMR (500 MHz, CDCl<sub>3</sub>)  $\delta$ : 9.39 (s, 1H), 9.17 (s, 1H), 7.93-7.91 (d, *J* = 7.9 Hz, 2H), 7.86-7.84 (dd, *J* = 7.9 Hz, *J* = 1.2 Hz, 1H), 7.66-7.62 (t, *J* = 8.5 Hz, 1H), 7.6-7.56 (t, *J* = 8.2 Hz, 1H), 7.34-7.31 (t, *J* = 7.3 Hz, 1H), 7.25-7.24 (d, *J* = 7 Hz, 2H), 7.07 (bs, 1H), 6.87-6.84 (t, *J* = 6.4 Hz, 1H), 6.48 (bs, 1H), 5.08 (bs, 1H), 3.64-3.63 (d, *J* = 6.1 Hz, 2H), 3.46-3.45 (d, *J* = 6.7 Hz, 2H),

2.68-2.67 (d,  $J = 4.8$  Hz, 3H), 1.61 (s, 6H), 1.54 (s, 6H), 1.49 (s, 9H);  $^{13}\text{C}$  NMR (100 MHz,  $\text{CDCl}_3$ )  $\delta$ : 173.1, 172, 170.8, 168.2, 156.4, 134.6, 134.2, 133.9, 129.8, 129.6, 129, 125.8, 124.9, 81.8, 57.9, 57.6, 46.1, 45.4, 28.5, 26.1, 25.5, 25; HRMS:  $\text{C}_{30}\text{H}_{44}\text{O}_{10}\text{N}_7\text{S}_2$ , Calcd: 726.2586 Found: 727.2590.  $\text{C}_{30}\text{H}_{44}\text{O}_{10}\text{N}_7\text{S}_2$ , Calcd: 748.2405 Found: 748.2397.

**tert-butyl-2-((2-(N-(2-methoxy-2-oxoethyl)sulfamoyl)phenyl)carbamoyl)pyrrolidine-1-carboxylate 3a:**

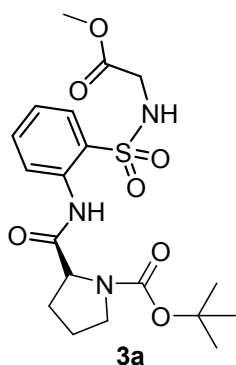

To a two necked round-bottom flask containing Boc-Pro-OH (0.21 g, 0.98 mmol) in THF, dry  $\text{Et}_3\text{N}$  (0.12 mL, 1.22 mmol) and ethyl chloroformate (0.09 mL, 0.98 mmol) were added drop wise at 0 °C followed by the addition of amine **11** (0.2 g, 0.81 mmol). The reaction mixture was stirred at 0 °C for 1 h and then refluxed for 48 h. Later, the reaction mixture was cooled to room temperature and filtered. The solvent was evaporated to get the crude product, which was taken into DCM (30 mL) and washed with sat.  $\text{NaHCO}_3$ , brine and sat.  $\text{KHSO}_4$  solutions. The organic layer was dried over

anhydrous  $\text{Na}_2\text{SO}_4$  and evaporated under reduced pressure to get the crude product which was further purified by column chromatography (eluent: pet ether/ethyl acetate: 30:70, Rf: 0.5) to furnish **3a** (0.21 g, 60%) as a sticky substance;  $[\alpha]_D^{26}$ :  $-110^\circ$  ( $c$  1,  $\text{CHCl}_3$ ); IR ( $\text{CHCl}_3$ )  $\nu$  ( $\text{cm}^{-1}$ ) 3684, 3621, 3344, 3213, 3020, 1742, 1673, 1583, 1519, 1476, 1440, 1392, 1295, 1217, 1157, 1130, 1044, 928, 770, 668, 491;  $^1\text{H}$  NMR (500 MHz,  $\text{CDCl}_3$ )  $\delta$ : 9.47 (s, 1H), 8.11-8.09 (d,  $J = 7.6$  Hz, 1H), 7.84-7.82 (dd,  $J = 7.9$  Hz, 1.5 Hz, 1H), 7.55-7.52 (t,  $J = 7$  Hz, 1H), 7.21-7.17 (t,  $J = 7.2$  Hz, 1H), 7.08 (bs, 1H), 4.36-4.34 (dd,  $J = 8.5$  Hz, 3 Hz, 1H), 3.76-3.71 (dd,  $J = 17.7$  Hz, 5.8 Hz, 1H), 3.66-3.61 (dd,  $J = 6.4$  Hz, 18 Hz, 1H), 3.55-3.51 (m, 1H), 3.42 (s, 3H), 2.3 (bs, 1H), 2.25-2.19 (m, 1H), 1.96-1.91 (m, 2H);  $^{13}\text{C}$  NMR (125 MHz,  $\text{CDCl}_3$ )  $\delta$ : 170.9, 168.4, 156.6, 134.8, 133.4, 129.0, 128.9, 124.4, 124.1, 81.8, 62.0, 52.2, 47.5, 43.8, 30.3, 28.4, 28.2, 24.3; HRMS:  $\text{C}_{19}\text{H}_{28}\text{O}_7\text{N}_3\text{S}$ , Calcd: 442.1642 Found: 442.1644;  $\text{C}_{19}\text{H}_{27}\text{O}_7\text{N}_3\text{SNa}$ , Calcd: 464.1462 Found: 464.1465.

**tert-butyl-2-((2-(N-(2-(methylamino)-2-oxoethyl)sulfamoyl)phenyl) carbamoyl)pyrrolidine-1-carboxylate 3:**

Compound **3** was isolated as a white solid using the general method mentioned earlier (eluent: pet. ether/ethyl acetate: 40:60, Rf: 0.4) in 95% yield; mp: 130-132 °C;  $[\alpha]_D^{26}$ :  $-42^\circ$  ( $c$  1,  $\text{CHCl}_3$ ); IR ( $\text{CHCl}_3$ )  $\nu$  ( $\text{cm}^{-1}$ ): 3683, 3618, 3438, 3356, 3192, 3018, 2888, 2400, 1670, 1583, 1523, 1475,

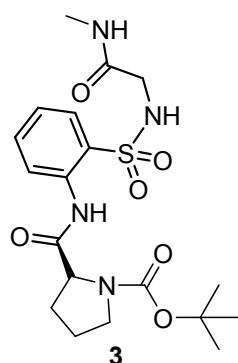

1420, 1394, 1336, 1218, 1158, 927, 847, 771, 590;  $^1\text{H}$  NMR (500 MHz,  $\text{CDCl}_3$ )  $\delta$ : 9.26 (s, 1H), 8.03-7.99 (d,  $J = 8.1$  Hz, 1H), 7.92-7.87 (dd,  $J = 7.9$  Hz, 1.5 Hz, 1H), 7.64-7.56 (m, 1H), 7.33-7.24 (m, 2H), 7.2-7.14 (m, 1H), 6.52-6.49 (m, 1H), 4.3-4.24 (m, 1H), 3.63-3.42 (m, 4H), 2.67-2.64 (d,  $J = 4.8$  Hz, 3H), 2.33-2.23 (m, 2H), 2.14-1.89 (m, 2H), 1.47 (s, 9H),  $^{13}\text{C}$  NMR (125 MHz,  $\text{CDCl}_3$ )  $\delta$ : 171.3, 168.1, 156.1, 134.2, 133.8, 129.3, 125.3, 125.0, 81.4, 61.9, 47.5, 45.4, 30.4, 28.4, 25.9, 24.5; HRMS:  $\text{C}_{19}\text{H}_{29}\text{O}_6\text{N}_4\text{S}$ , Calcd: 441.1802 Found: 441.1794;  $\text{C}_{19}\text{H}_{28}\text{O}_6\text{N}_4\text{SNa}$ , Calcd: 463.1622 Found: 463.1613.

**tert-butyl-2-((2-(N-(2-(2-((2-(N-(2-methoxy-2-oxoethyl)sulfamoyl)phenyl)-carbamoyl)pyrrolidin-1-yl)-2-oxoethyl)sulfamoyl)phenyl)carbamoyl) pyrrolidine-1-carboxylate 7a:**

The acid **3c** (0.09 g, 0.22 mmol) was coupled with the amine **3b** (0.07 g, 0.22 mmol) in the presence of EDC. HCl (0.05 g, 0.27 mmol),  $\text{Et}_3\text{N}$  (0.09 mL, 0.68 mmol) and HOBt (0.006 g, 0.04 mmol) using dry DCM as solvent at  $0^\circ\text{C}$ . The reaction mixture was allowed to attain room temperature and stirred for 12 h. Later, the reaction mixture was washed with sat.  $\text{NaHCO}_3$ , water, sat  $\text{KHSO}_4$  and brine solutions. The organic layer was dried over anhydrous  $\text{Na}_2\text{SO}_4$  and evaporated under reduced pressure to get the crude product which on purification by column chromatography (eluent: pet ether/ethyl acetate: 40:60, Rf: 0.4) yielded **16a** (0.08 g, 50%) as a white solid; mp:  $150\text{-}153^\circ\text{C}$ ;  $[\alpha]_{\text{D}}^{26}$ :  $-90^\circ$  ( $c$  1,  $\text{CHCl}_3$ ); IR ( $\text{CHCl}_3$ )  $\nu$  ( $\text{cm}^{-1}$ ): 3344, 3017, 1690, 1584, 1525, 1438, 1387, 1332, 1218, 1156, 1126, 847, 770, 480.  $^1\text{H}$  NMR (400 MHz,  $\text{CDCl}_3$ )  $\delta$ : 9.75 (s, 1H), 9.36 (s, 1H), 8.27 (d,  $J = 7.7$  Hz, 1H), 8.16-8.14 (d,  $J = 8$  Hz, 1H), 7.91-7.89 (d,  $J = 7.5$  Hz, 1H), 7.82-7.8 (d,  $J = 7.7$  Hz, 1H), 7.59-7.5 (m, 2H), 7.24-7.16 (m, 2H), 7.01 (bs, 1H), 6.75 (bs, 1H), 4.44-4.4 (m, 2H), 4.15-4.09 (q, ethyl acetate), 3.93-3.82 (m, 1H), 3.77-3.75 (m, 2H), 3.67-3.53 (m, 2H), 3.46 (s, 2H), 3.39-3.36 (m, 1H), 2.3-1.92 (m, 8H), 1.53 (s, 9H);  $^{13}\text{C}$  NMR (100 MHz,  $\text{CDCl}_3$ )  $\delta$ : 171.3, 169.1, 168.5, 156.5, 135.6, 134.8, 133.8, 133.5, 129.1, 129, 128.6, 124.1, 123.7, 81.4, 62.1, 61.9, 60.3, 52.3, 47.6, 46.5, 44.5, 44, 30.4, 28.7, 28.5, 24.8, 24.3; HRMS:  $\text{C}_{32}\text{H}_{43}\text{O}_{11}\text{N}_6\text{S}_2$ , Calcd: 751.2426 Found: 751.2418;  $\text{C}_{32}\text{H}_{42}\text{O}_{11}\text{N}_6\text{S}_2\text{Na}$ , Calcd: 773.2245 Found: 773.2234.

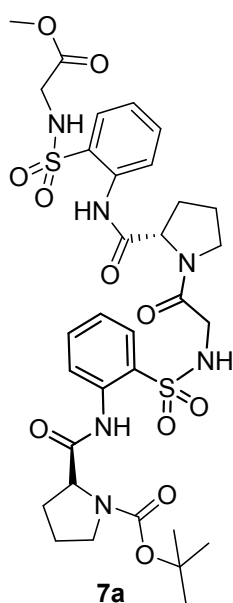

**tert-butyl-2-((2-(N-(2-(2-((2-(N-(2-(methylamino)-2-oxoethyl)sulfamoyl)phenyl)carbamoyl)pyrrolidin-1-yl)-2-oxoethyl)sulfamoyl)phenyl)carbamoyl)pyrrolidine-1-carboxylate 7:**

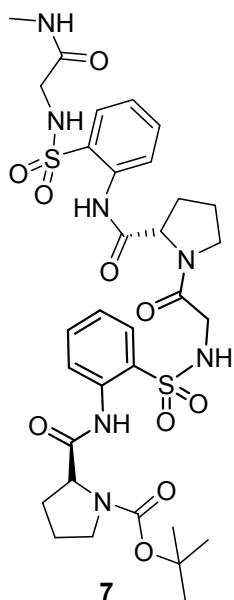

The compound 7 was isolated as a white solid following the general method mentioned earlier in 90% yield; mp: 160-162 °C;  $[\alpha]_D^{26}$ : -92.3° (c 0.26, CHCl<sub>3</sub>); IR (CHCl<sub>3</sub>)  $\nu$  (cm<sup>-1</sup>): 3684, 3618, 3019, 2400, 1666, 1584, 1523, 1475, 1423, 1334, 1215, 1045, 928, 770, 669, 490; <sup>1</sup>H NMR (400 MHz, CDCl<sub>3</sub>)  $\delta$ : 9.45 (s, 1H), 9.41 (s, 1H), 8.22-8.2 (d, *J* = 8.2 Hz, 1H), 8.11-8.09 (d, *J* = 7.9 Hz, 1H), 7.94-7.92 (d, *J* = 7.3 Hz, 1H), 7.88-7.86 (d, *J* = 7.3 Hz, 1H), 7.62-7.59 (t, *J* = 7.6 Hz, 1H), 7.58-7.55 (t, *J* = 8.2 Hz, 1H), 7.25-7.21 (m, 2H), 7.01 (bs, 2H), 6.73 (bs, 1H), 4.33-4.32 (dd, *J* = 8.9 Hz, 2.7 Hz, 1H), 4.28-4.27 (d, *J* = 5.2 Hz, 1H), 3.92-3.88 (dd, *J* = 16.9 Hz, 3.2 Hz, 1H), 3.73-3.69 (m, 1H), 3.56-3.42 (m, 5H), 3.31-3.28 (m, 1H), 2.69-2.68 (d, *J* = 4.9 Hz, 3H), 2.3-2.29 (m, 1H), 2.25-2.22 (m, 2H), 2.1-1.93 (m, 5H), 1.53 (s, 9H); <sup>13</sup>C NMR (100 MHz, CDCl<sub>3</sub>)  $\delta$ : 171.2, 169.3, 168.5, 168.3, 157.1,

135.1, 134.6, 134.2, 130.0, 129.1, 128.7, 126.6, 124.9, 124.4, 124.2, 123.4, 82.1, 62.1, 47.7, 46.6, 45.3, 44.3, 30.5, 29.1, 28.6, 26.6, 24.7, 24.3; HRMS: C<sub>32</sub>H<sub>44</sub>O<sub>10</sub>N<sub>7</sub>S<sub>2</sub>, Calcd: 750.2586 Found: 751.2578; C<sub>32</sub>H<sub>43</sub>O<sub>10</sub>N<sub>7</sub>S<sub>2</sub>Na, Calcd: 772.2405 Found: 772.2386.

**Methyl ((2-(2-nitrobenzamido)phenyl)sulfonyl)prolinate 4:**

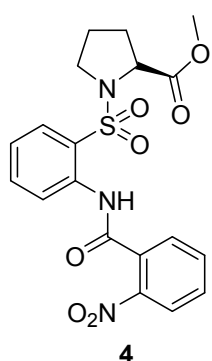

To a solution of amine 13 (0.2 g, 0.7 mmol) in DCM (10 mL), pyridine (0.08 mL, 1.05 mmol) was added followed by the addition of 2-nitro benzoyl chloride (0.19 g, 1.05 mmol) drop wise at 0 °C. The reaction mixture was allowed to attain room temperature and stirred for 5 h. Later, the reaction mixture was diluted with DCM and washed with CuSO<sub>4</sub> solution, water, sat. NaHCO<sub>3</sub> solutions. The organic layer was dried over Na<sub>2</sub>SO<sub>4</sub> and evaporated under reduced pressure. The residue obtained was purified by column chromatography (eluent: pet ether/ethyl acetate: 60:40, R<sub>f</sub>: 0.5) yielding 4 (0.277 g, 90%); mp: 143-146 °C;  $[\alpha]_D^{26}$ : -164° (c 1, CHCl<sub>3</sub>); IR (CHCl<sub>3</sub>)  $\nu$  (cm<sup>-1</sup>): 3323, 3022, 2400, 1743, 1690, 1586, 1531, 1437, 1348, 1218, 1157, 1077, 1020, 857, 771, 499; <sup>1</sup>H NMR (200 MHz, CDCl<sub>3</sub>)  $\delta$ : 10.08 (s, 1H), 8.69-8.65 (d, *J* = 8.2 Hz, 1H), 8.16-8.12

(d,  $J = 7.3$  Hz, 1H), 7.99-7.94 (dd,  $J = 7.9$  Hz, 1.5 Hz, 1H), 7.78-7.59 (m, 4H), 7.34-7.26 (m, 1H), 4.45-4.38 (dd,  $J = 8.8$  Hz, 4.2 Hz, 1H), 3.44 (s, 3H), 3.33-3.21 (m, 2H), 2.29-2.14 (m, 1H), 2.06-1.83 (m, 3H);  $^{13}\text{C}$  NMR (50 MHz,  $\text{CDCl}_3$ )  $\delta$ : 172.4, 164.8, 146.5, 136.3, 134.7, 133.8, 132.9, 130.5, 130, 128.6, 125.7, 124.4, 124.3, 123.4, 59.2, 52.4, 48.7, 30.8, 24.7; HRMS:  $\text{C}_{19}\text{H}_{20}\text{O}_7\text{N}_3\text{S}$ , Calcd: 434.1016 Found: 434.1016.

**Methyl ((2-(2-acetamidobenzamido)phenyl)sulfonyl)prolinate 4a:**

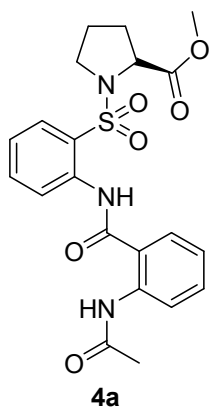

Compound **4a** was obtained as white solid using the general method mentioned earlier. mp: 113-115 °C;  $[\alpha]_D^{26}$ :  $-62^\circ$  ( $c$  1,  $\text{CHCl}_3$ ); IR ( $\text{CHCl}_3$ )  $\nu$  ( $\text{cm}^{-1}$ ): 3785, 3682, 3620, 3343, 3018, 2400, 1748, 1686, 1663, 1583, 1522, 1429, 1336, 1294, 1218, 1045, 928, 668;  $^1\text{H}$  NMR (500 MHz,  $\text{CDCl}_3$ )  $\delta$ : 11.13 (s, 1H), 8.69-8.67 (d,  $J = 8.2$  Hz, 1H), 8.57-8.55 (dd,  $J = 8.5$  Hz, 1 Hz, 1H), 7.95-7.94 (dd,  $J = 8.2$  Hz, 1.5 Hz, 1H), 7.79-7.78 (dd,  $J = 7.9$  Hz, 1.2 Hz, 1H), 7.68-7.64 (t,  $J = 8.6$  Hz, 1H), 7.56-7.52 (t,  $J = 8.5$  Hz, 1H), 7.31-7.28 (t,  $J = 8.2$  Hz, 1H), 7.19-7.15 (t,  $J = 8.2$  Hz, 1H), 4.54-4.32 (dd,  $J = 8.5$

Hz, 3.3 Hz, 1H), 3.46 (s, 3H), 3.44-3.35 (m, 2H), 2.23 (s, 3H), 2.18-2.08 (m, 1H), 2.04-1.92 (m, 2H), 1.91-1.82 (m, 1H);  $^{13}\text{C}$  NMR (125 MHz,  $\text{CDCl}_3$ )  $\delta$ : 171.8, 168.9, 167.4, 140.5, 136.2, 134.3, 133.4, 129.8, 126.9, 124.3, 123, 121.5, 119.5, 59.9, 52.3, 48.5, 30.9, 25.3, 24.5; HRMS:  $\text{C}_{21}\text{H}_{24}\text{O}_6\text{N}_3\text{S}$ , Calcd: 446.138 Found: 446.138;  $\text{C}_{24}\text{H}_{22}\text{O}_6\text{N}_4\text{BrS}$ , Calcd: 468.12 Found: 468.1199.

**((2-(2-acetamidobenzamido)phenyl)sulfonyl)proline 5:**

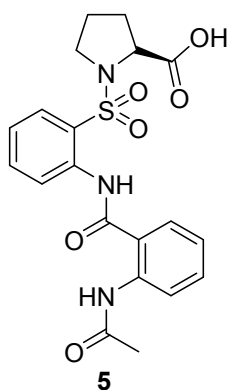

Compound **5** was obtained as a brown solid using the general method mentioned earlier. mp: 169-172 °C;  $[\alpha]_D^{26}$ :  $-92^\circ$  ( $c$  1,  $\text{CHCl}_3$ ); IR ( $\text{CHCl}_3$ )  $\nu$  ( $\text{cm}^{-1}$ ): 3684, 3619, 3353, 3020, 2400, 1734, 1664, 1583, 1523, 1471, 1430, 1331, 1296, 1217, 1045, 928, 770, 667, 626, 607;  $^1\text{H}$  NMR (400 MHz,  $\text{CDCl}_3$ )  $\delta$ : 10.42 (s, 1H), 10.25 (s, 1H), 8.48-8.46 (d,  $J = 8$  Hz, 1H), 8.19-8.17 (dd,  $J = 8$  Hz, 1H), 7.96-7.94 (d,  $J = 9$  Hz, 1H), 7.74-7.72 (d,  $J = 7.7$  Hz, 1H), 7.68-7.64 (t,  $J = 7.5$  Hz, 1H), 7.55-7.51 (t,  $J = 7.5$  Hz, 1H), 7.3-7.23 (m, 4H), 4.47-4.44 (dd,  $J = 3$  Hz,  $J = 8.7$  Hz, 1H), 3.46-3.36 (m, 2H),

3.3-3.25 (m, 1H), 2.21 (s, 3H), 2.17-2.04 (m, 2H), 1.94-1.88 (m, 2H);  $^{13}\text{C}$  NMR (100 MHz,  $\text{CDCl}_3$ )  $\delta$ : 173.8, 171.3, 167, 138.1, 136, 134.2, 132.6, 129.8, 127.1, 126.7, 124.6, 124.2, 124, 123, 60, 47.9, 30.9, 24.9, 24.6; HRMS:  $\text{C}_{20}\text{H}_{22}\text{O}_6\text{N}_3\text{S}$ , Calcd: 432.1224 Found: 432.1224.

**Crystal data:** Data for the compounds **1**, **2**, **3**, **4** and **5** were collected on SMART APEX-II CCD using Mo-K $\alpha$  radiation ( $\lambda = 0.7107 \text{ \AA}$ ) to a maximum  $\theta$  range of  $25.00^\circ$ . Crystal to detector distance 5.00 cm, 512 x 512 pixels / frame, Oscillation / frame  $-0.5^\circ$ , maximum detector swing angle =  $-30.0^\circ$ , beam center = (260.2, 252.5), in plane spot width = 1.24, SAINT integration with different exposure time per frame and SADABS correction applied. All the structures were solved by direct methods using SHELXTL. All the data were corrected for Lorentzian, polarisation and absorption effects. SHELX-97 (ShelxTL) was used for structure solution and full matrix least squares refinement on  $F^2$ . Hydrogen atoms were included in the refinement as per the riding model. The refinements were carried out using SHELXL-97.

**Crystal data for 1:**

Single crystals of **1** were grown by slow evaporation of its solution in ethyl acetate and DCM. Colorless cube like crystal of approximate size  $0.31 \times 0.12 \times 0.07 \text{ mm}^3$ , was used for data collection. Multi-run data acquisition. Total scans = 4, total frames = 1271, Oscillation / frame -  $0.3^\circ$ , exposure / frame = 15.0 sec / frame,  $\theta$  range = 2.23 to  $25.00^\circ$ , completeness to  $\theta$  of  $25.00^\circ$  is 99.9 %.  $C_{18}H_{27}N_3O_7S$ ,  $MW = 429.49$ , Crystals belong to Triclinic, space group P-1,  $a = 10.0269(3)$ ,  $b = 11.0127(3)$ ,  $c = 19.1212(5) \text{ \AA}$ ,  $V = 2072.5(1) \text{ \AA}^3$ ,  $Z = 4$ ,  $D_c = 1.376 \text{ g/cc}$ , (Mo-K $\alpha$ ) =  $0.201 \text{ mm}^{-1}$ , 30705 reflections measured, 7277 unique [ $I > 2\sigma(I)$ ],  $R1 = 0.036$ ,  $wR2 = 0.0829$ , Largest diff. peak and hole  $0.576$  and  $-0.519 \text{ e.\AA}^{-3}$ . Two molecules with different conformations were present in the unit cell of **1**. One of the molecules showed intra-residual C6 H-bonding while the other molecule revealed inter-residual C11 H-bonding. The two molecules are shown in Fig. 1.

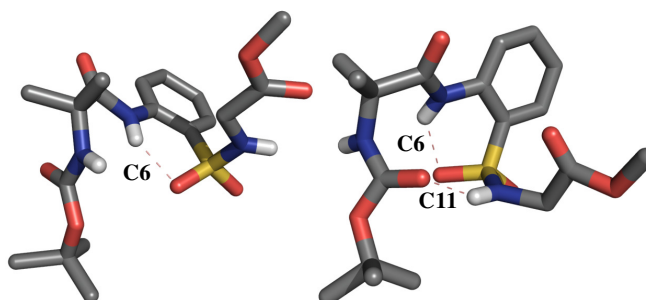

**Fig. 1:** Crystal structures of peptide **1** with only C6 H-bonding (left) and with C6 and C11 H-bonding (right) present in the unit cell of **1**.

**Crystal data for 2:**

Single crystals of **2** were grown by slow evaporation of the solution in ethyl acetate. Colorless needle like crystal of approximate size 0.42 x 0.25 x 0.12 mm<sup>3</sup>, was used for data collection. Multi-run data acquisition. Total scans = 4, total frames = 1271, Oscillation / frame -0.3°, exposure / frame = 15.0 sec / frame,  $\theta$  range = 2.23 to 25.00°, completeness to  $\theta$  of 25.00 ° is 100%. C<sub>18</sub>H<sub>28</sub>N<sub>4</sub>O<sub>6</sub>S, MW = 428.5, Crystals belong to Monoclinic, space group P21/c,  $a = 15.5747(6)$ ,  $b = 9.4947(3)$ ,  $c = 15.4473(6)$  Å,  $V = 2141.33(14)$  Å<sup>3</sup>,  $Z = 4$ ,  $D_c = 1.329$  g/cc, (Mo-K $\alpha$ ) = 0.192 mm<sup>-1</sup>, 16008 reflections measured, 3775 unique [ $I > 2\sigma(I)$ ],  $R1 = 0.0532$ ,  $wR2 = 0.1145$ , Largest diff. peak and hole 0.286 and -0.347 e.Å<sup>-3</sup>.

**Crystal data for 3:**

Single crystals of **3** were grown by slow evaporation of its solution in DCM and pet. ether. Colorless needle like crystal of approximate size 0.32 x 0.09 x 0.07 mm<sup>3</sup>, was used for data collection. Multi-run data acquisition. Total scans = 4, total frames = 1559, exposure / frame = 10.0 sec / frame,  $\theta$  range = 2.53 to 25.00°, completeness to  $\theta$  of 25.00 ° is 99.9 %. C<sub>19</sub>H<sub>28</sub>N<sub>4</sub>O<sub>6</sub>S, MW = 440.51, crystals belong to orthorhombic, space group P2<sub>1</sub>2<sub>1</sub>2<sub>1</sub>,  $a = 9.2146(8)$  Å,  $b = 14.611(1)$  Å,  $c = 16.096(1)$  Å,  $V = 2166.9(3)$  Å<sup>3</sup>,  $Z = 4$ ,  $D_c = 1.35$  g/cc, (Mo-K $\alpha$ ) = 0.192 mm<sup>-1</sup>, 9609 reflections measured, 3803 unique, [ $I > 2\sigma(I)$ ]  $R1 = 0.0376$ ,  $wR2 = 0.0809$ , largest diff. peak and hole 0.389 and -0.425 e.Å<sup>-3</sup>.

**Crystal data for 4:**

Single crystals of **4** were grown by slow evaporation of the solution in chloroform. Colorless plate like crystal of approximate size 0.42 x 0.31 x 0.08 mm<sup>3</sup>, was used for data collection. Multi-run data acquisition. Total scans = 4, total frames = 1559, exposure / frame = 10.0 sec / frame,  $\theta$  range = 1.90 to 25.00°, completeness to  $\theta$  of 25.00 ° is 99.9 %. C<sub>19</sub>H<sub>19</sub>N<sub>3</sub>O<sub>7</sub>S, MW = 433.43, crystals belong to monoclinic, space group P2<sub>1</sub>,  $a = 7.5913(1)$  Å,  $b = 12.3192(2)$  Å,  $c = 11.3409(2)$  Å,  $V = 1004.34(3)$  Å<sup>3</sup>,  $Z = 4$ ,  $D_c = 1.433$  g/cc, (Mo-K $\alpha$ ) = 0.209 mm<sup>-1</sup>, 14526 reflections measured, 3527 unique, [ $I > 2\sigma(I)$ ]  $R1 = 0.0344$ ,  $wR2 = 0.0857$ , largest diff. peak and hole 0.137 and -0.189 e.Å<sup>-3</sup>.

**Crystal data for 5:**

Single crystals of **5** were grown by slow evaporation of the solution in acetone. Colorless needle like crystal of approximate size 0.43 x 0.19 x 0.1 mm<sup>3</sup>, was used for data collection. Multi-run



data acquisition. Total scans = 4, total frames = 1559, exposure / frame = 10.0 sec / frame,  $\theta$  range = 2.20 to 25.00°, completeness to  $\theta$  of 25.00 ° is 99.9 %.  $C_{20}H_{21}N_3O_6S$ ,  $MW = 431.46$ , crystals belong to monoclinic, space group  $P2_1$ ,  $a = 10.3772(5)$  Å,  $b = 10.9443(5)$  Å,  $c = 17.4395(7)$  Å,  $V = 1979.93(15)$  Å<sup>3</sup>,  $Z = 4$ ,  $D_c = 1.447$  g/cc,  $(Mo-K\alpha) = 0.208$  mm<sup>-1</sup>, 14978 reflections measured, 6559 unique,  $[I > 2\sigma(I)]$   $R1 = 0.0388$ ,  $wR2 = 0.1001$ , largest diff. peak and hole 0.244 and -0.274 e.Å<sup>-3</sup>. It was observed that in the crystal lattice of **5**, there existed two molecules with slightly different conformation at C-terminus. The overlaid structure of **5** is shown in Fig. 2.

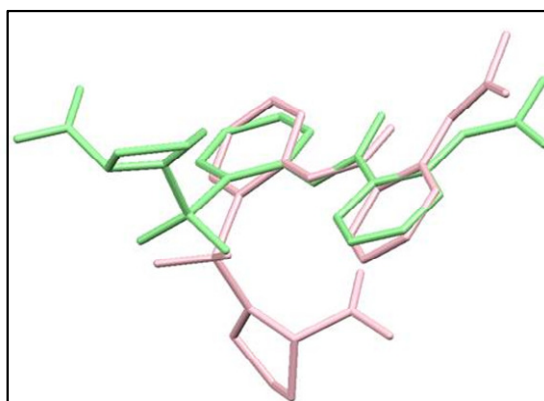

**Fig. 2:** Overlaid structure of the two conformers present in crystal lattice of **5**.

D:\Data\SGP-1

12/31/2012 4:58:13 PM

SGP-1 #816 RT: 3.63 AV: 1 NL: 2.53E9  
T: FTMS + p ESI Full ms [100.00-700.00]

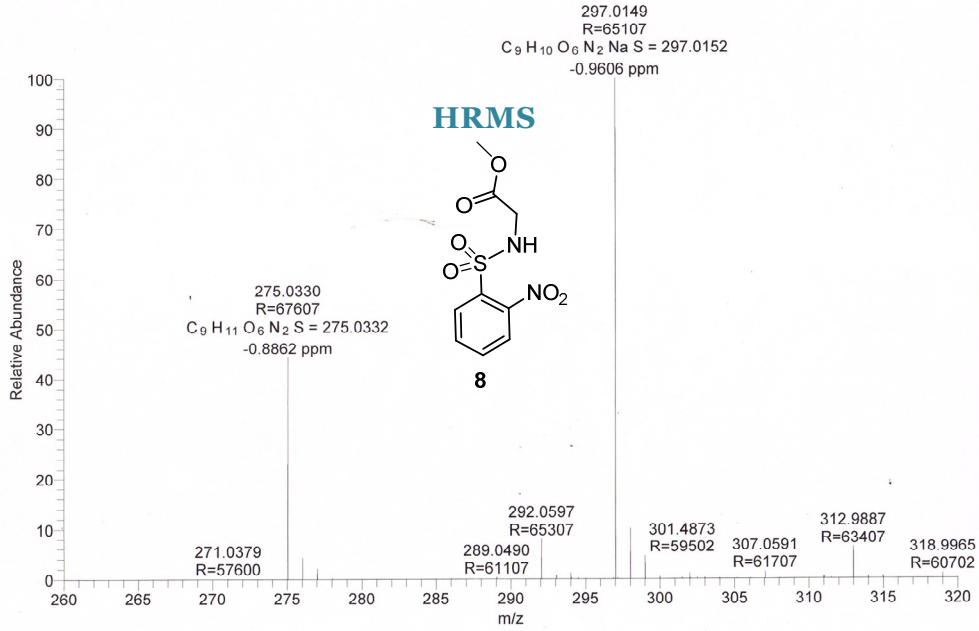

D:\Data\SGP-2

12/31/2012 5:09:25 PM

SGP-2 #898 RT: 4.00 AV: 1 NL: 6.08E8  
T: FTMS + p ESI Full ms [100.00-700.00]

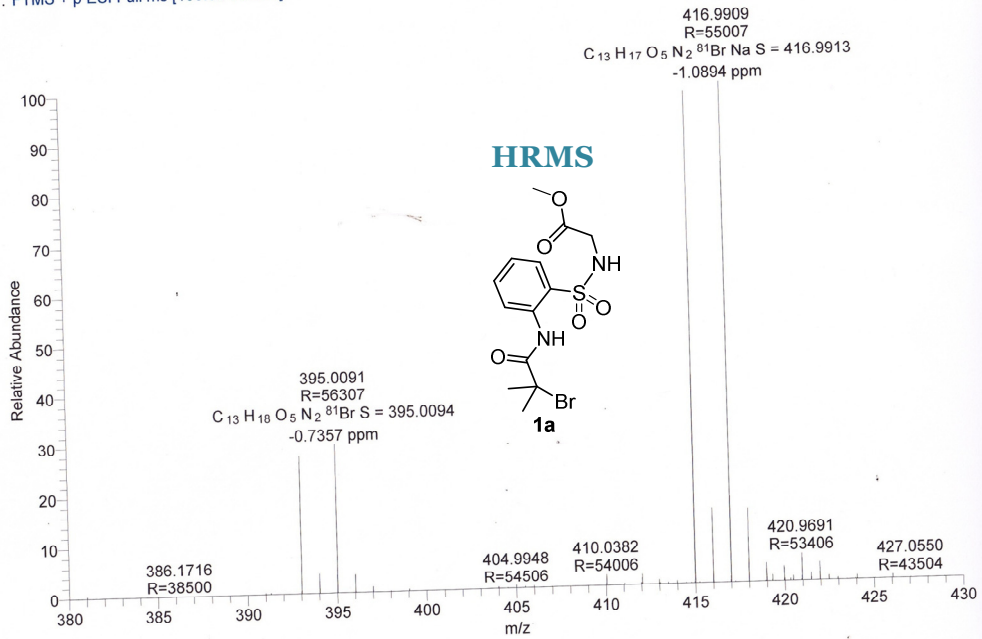

D:\Data\SGP-3

12/31/2012 5:20:37 PM

SGP-3 #892 RT: 3.97 AV: 1 NL: 1.42E9  
T: FTMS + p ESI Full ms [100.00-700.00]

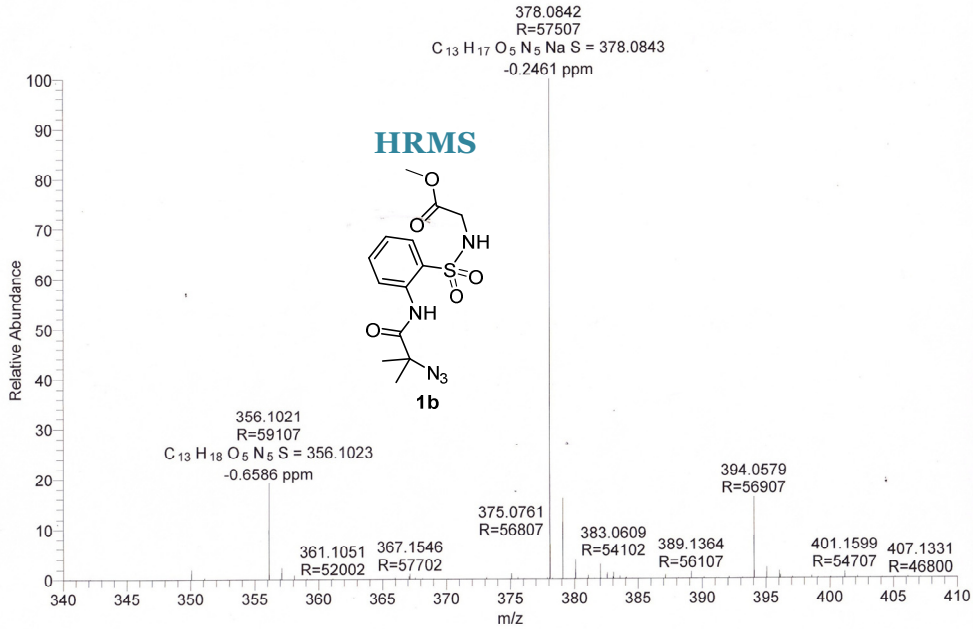

D:\Data\SGP-4

12/31/2012 5:31:45 PM

SGP-4 #884 RT: 3.94 AV: 1 NL: 9.57E8  
T: FTMS + p ESI Full ms [100.00-700.00]

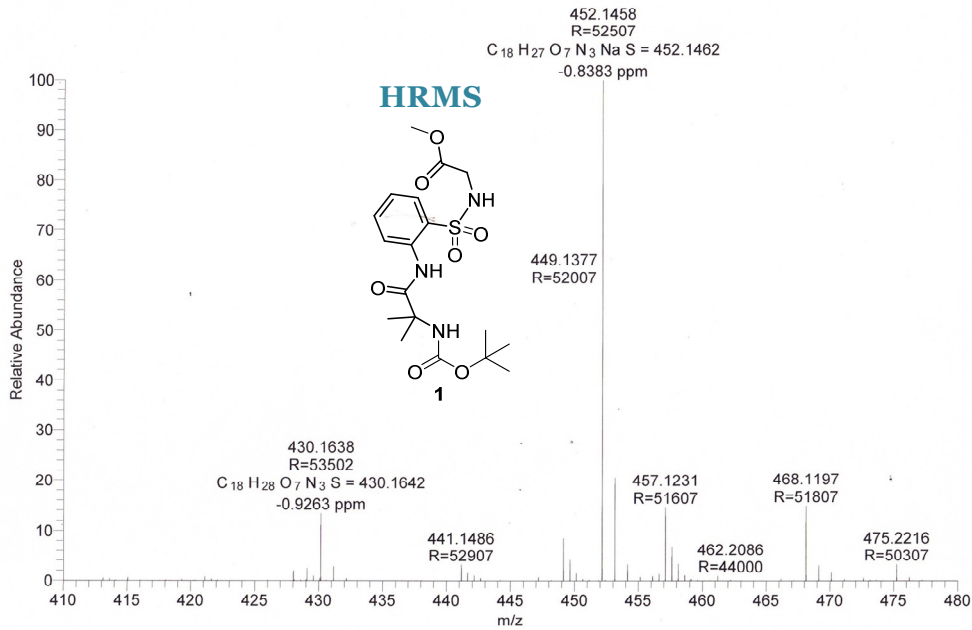

D:\Data\SGP-5

12/31/2012 5:42:53 PM

SGP-5 #919 RT: 4.09 AV: 1 NL: 3.87E8  
T: FTMS + p ESI Full ms [100.00-700.00]

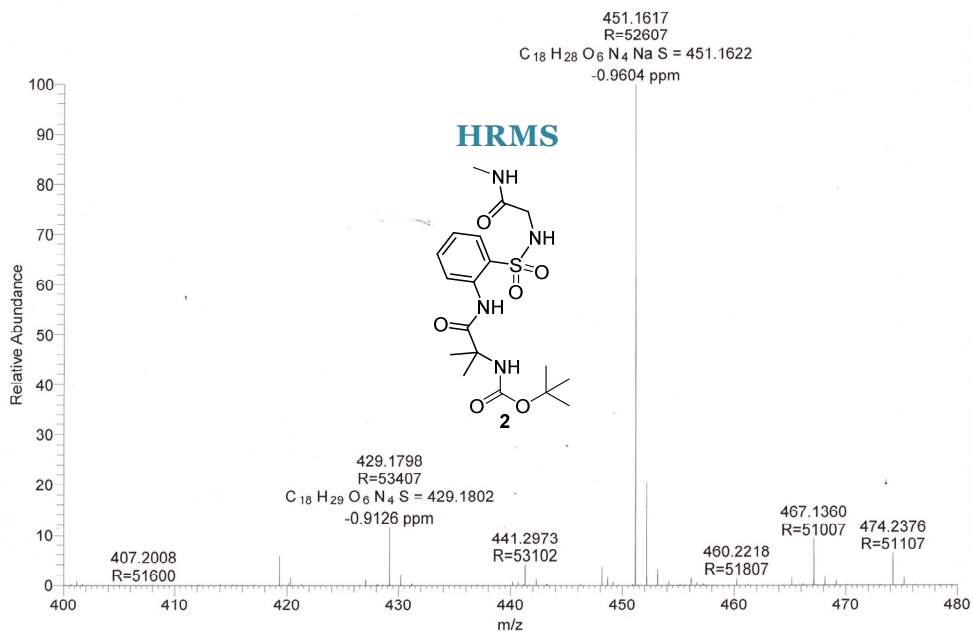

D:\Data\SGP-3

12/31/2012 5:20:37 PM

SGP-3 #892 RT: 3.97 AV: 1 NL: 1.42E9  
T: FTMS + p ESI Full ms [100.00-700.00]

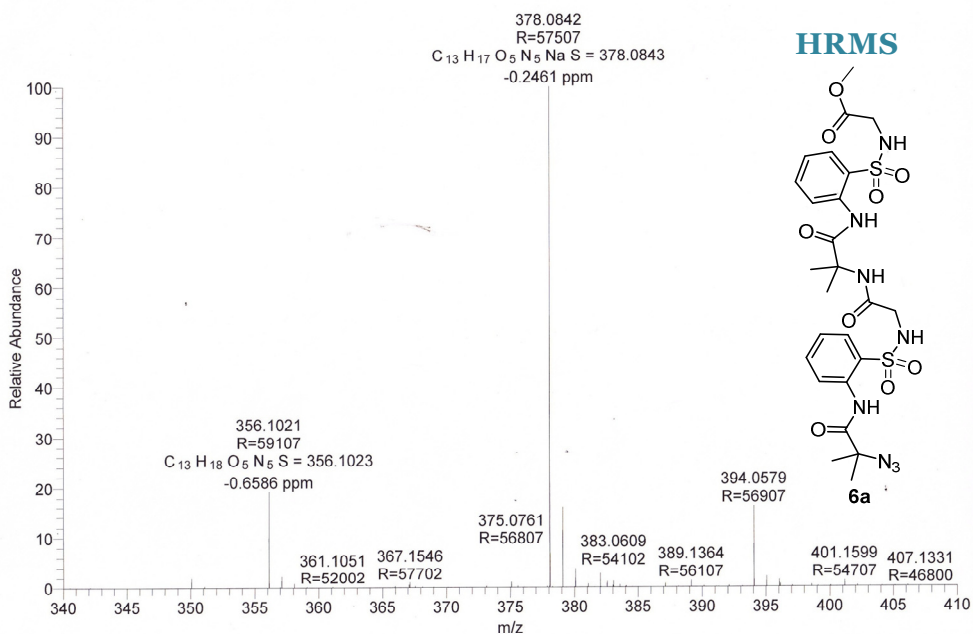

D:\Data\SGP-7

1/2/2013 3:28:03 PM

SGP-7 #909 RT: 4.05 AV: 1 NL: 3.19E9  
T: FTMS + p ESI Full ms [200.00-1200.00]

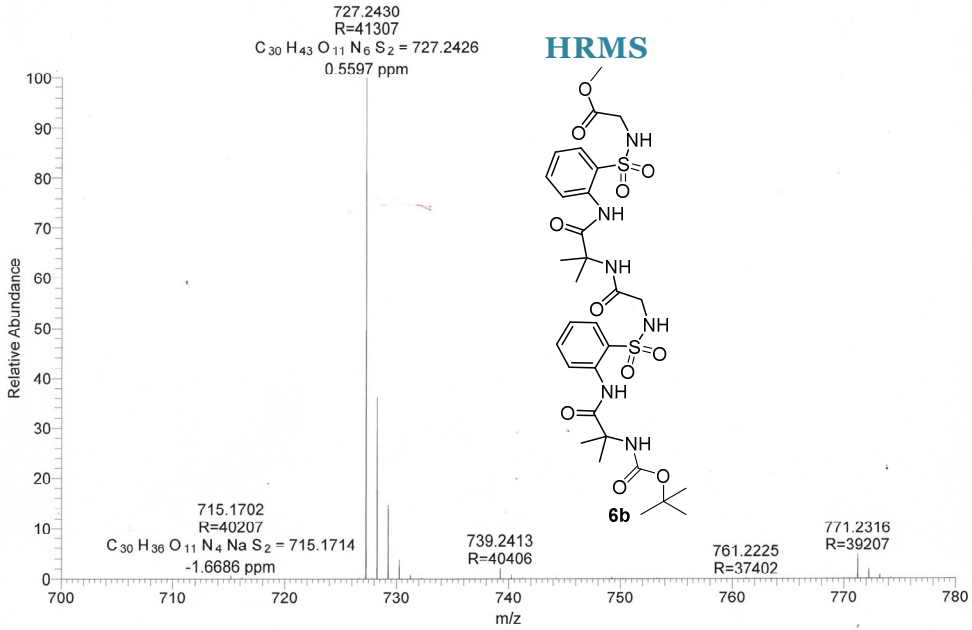

D:\Data\SGP-8

1/2/2013 5:08:32 PM

SGP-8 #875 RT: 3.90 AV: 1 NL: 2.00E9  
T: FTMS + p ESI Full ms [200.00-1200.00]

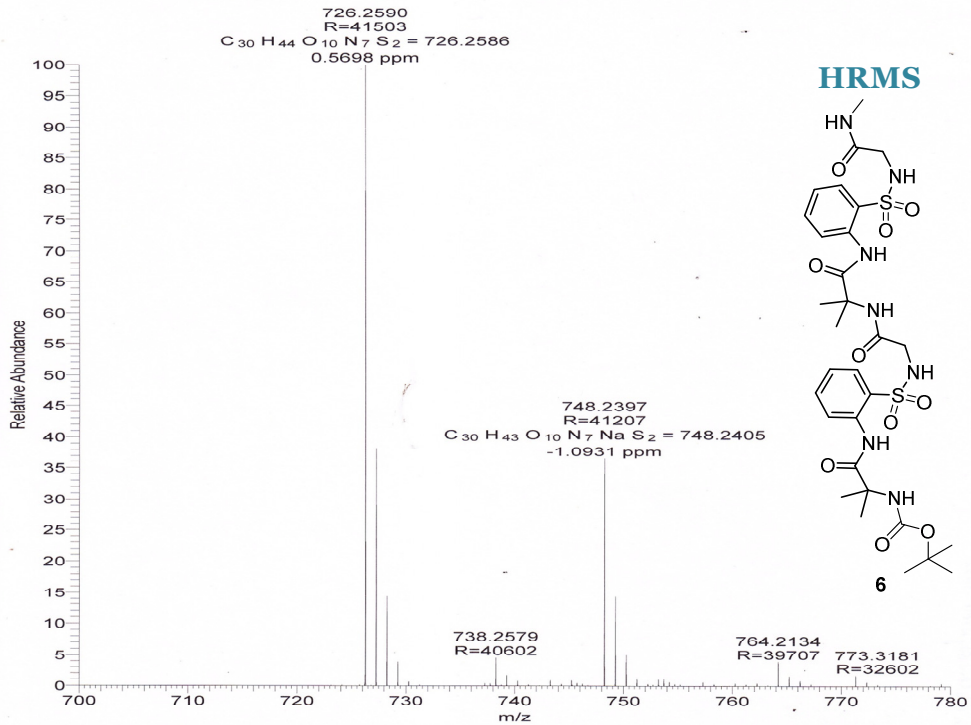

D:\Data\SGP-11

1/2/2013 2:54:33 PM

SGP-11 #894 RT: 3.98 AV: 1 NL: 5.57E8  
T: FTMS + p ESI Full ms [100.00-700.00]

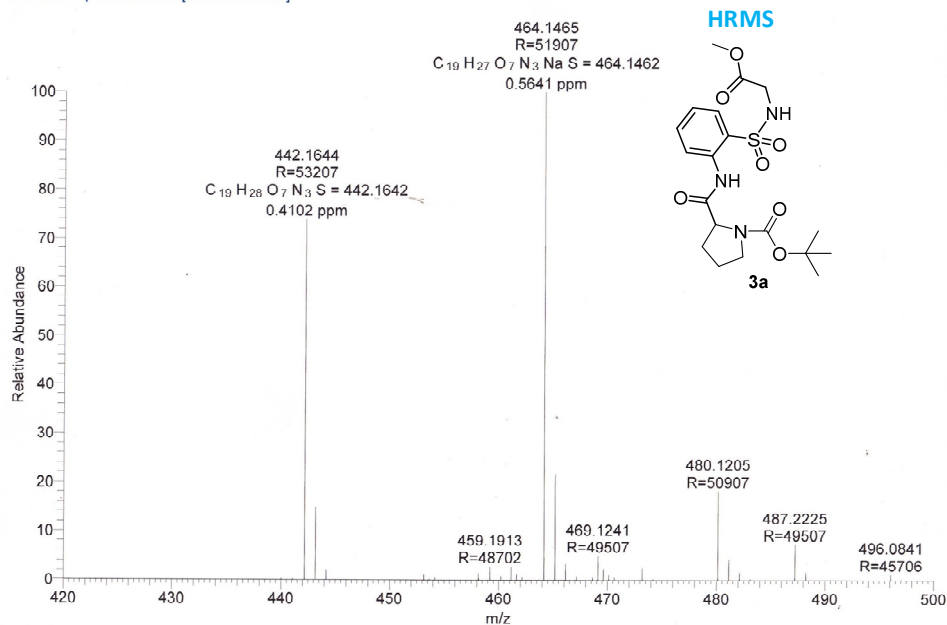

D:\Data\SGP-46

2/6/2013 3:51:56 PM

SGP-46 #864 RT: 3.85 AV: 1 NL: 9.36E7  
T: FTMS + p ESI Full ms [100.00-700.00]

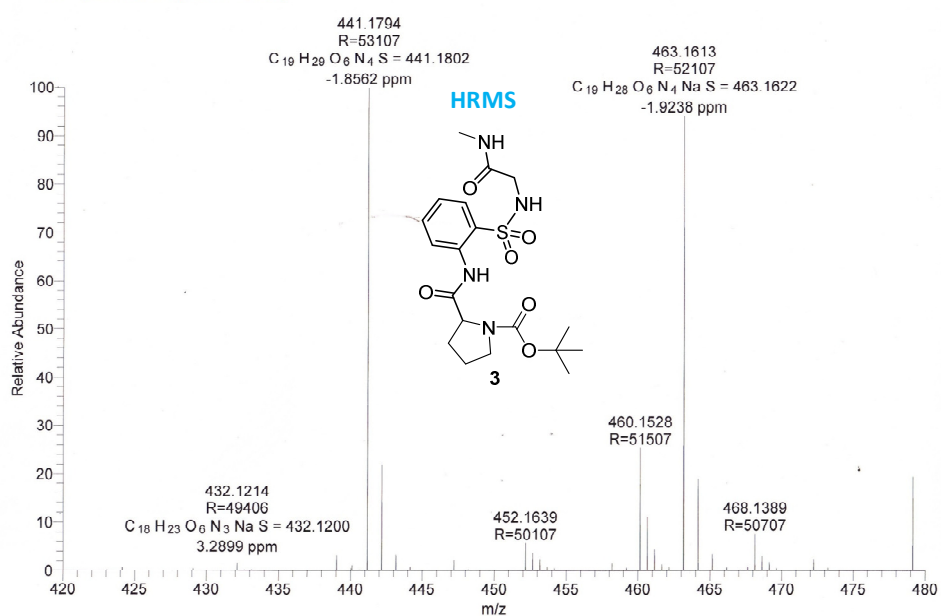

Note: The stereochemistry of prolines in **3a** and **3** is 'S'

SGP-21 #921 RT: 4.10 AV: 1 NL: 4.51E8  
T: FTMS + p ESI Full ms [200.00-1200.00]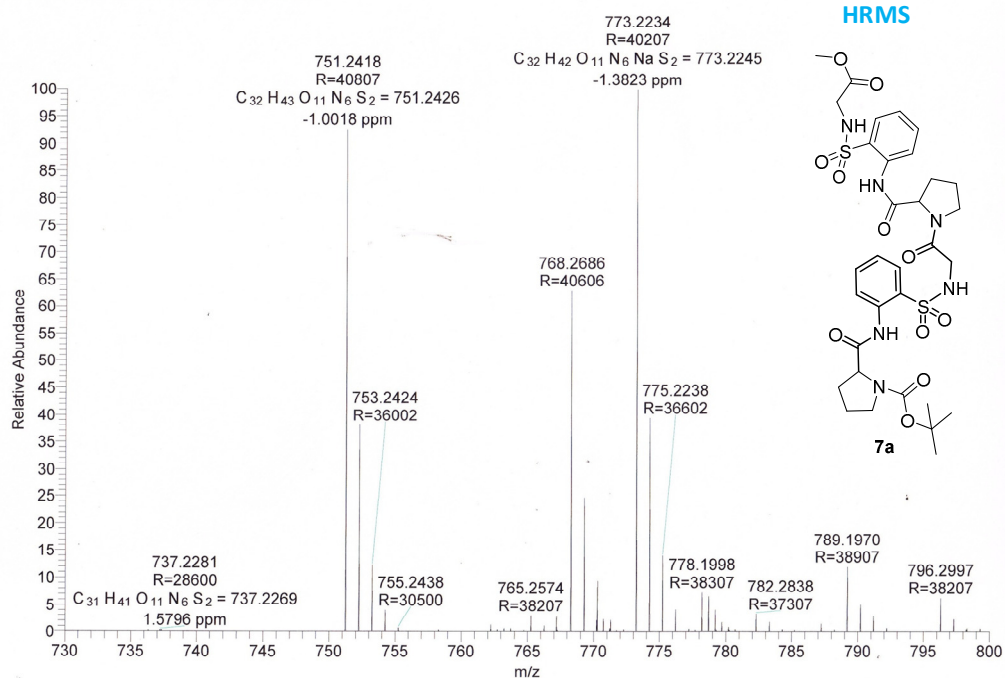

Note: The stereochemistry of prolines in **7** is 'S'

SGP-22 #903 RT: 4.02 AV: 1 NL: 2.20E9  
T: FTMS + p ESI Full ms [200.00-1200.00]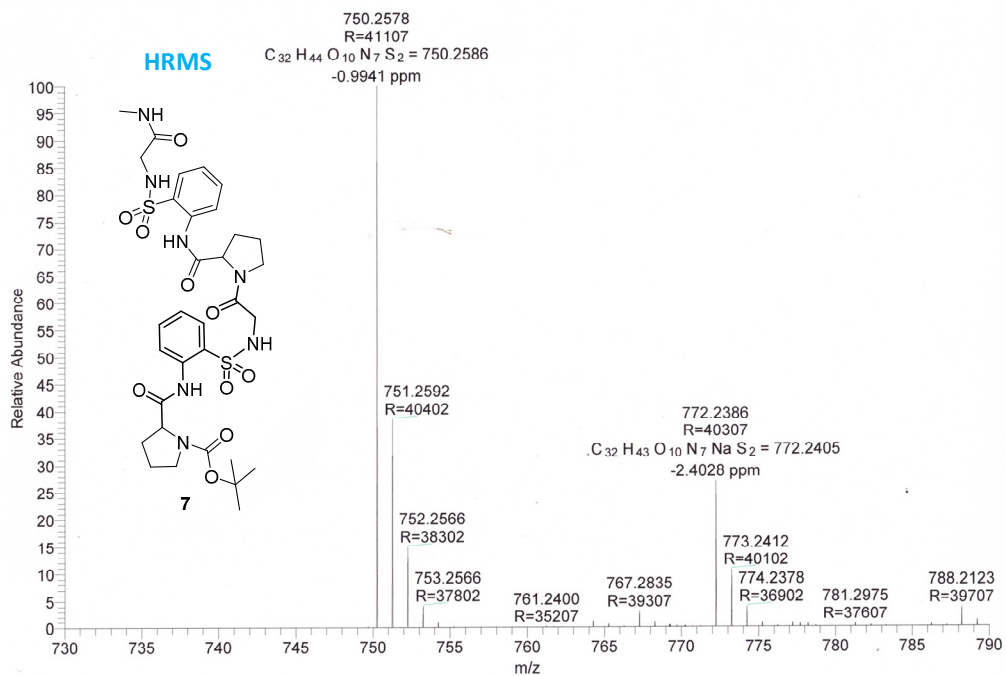SGP-31 #884 RT: 3.94 AV: 1 NL: 1.72E9  
T: FTMS + p ESI Full ms [100.00-700.00]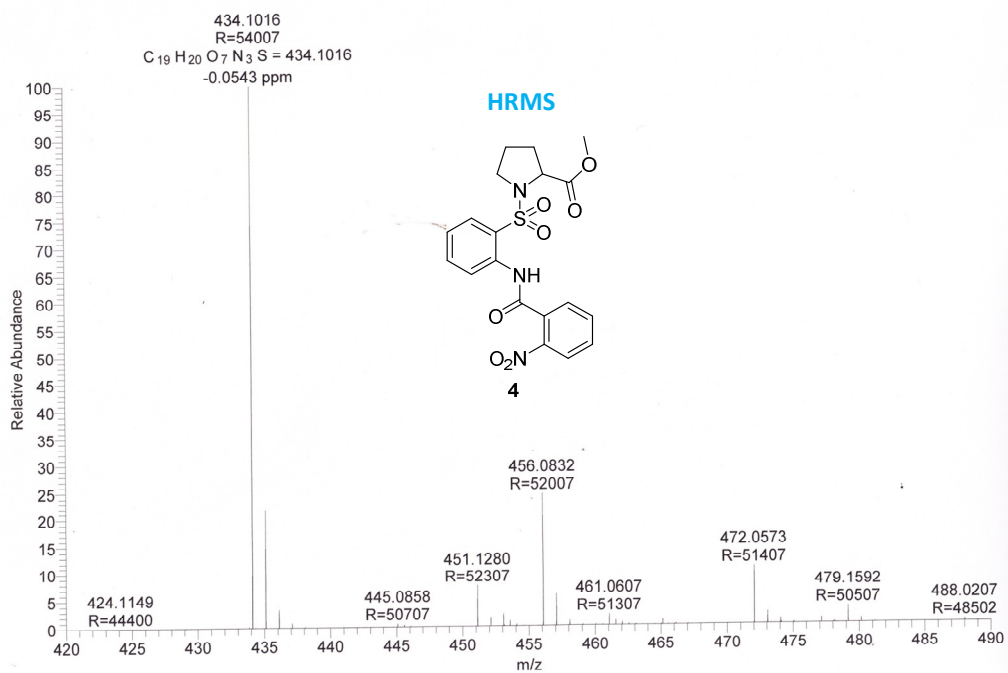

Note: The stereochemistry of prolines in **4** and **7**



D:\Data\SGP-12

1/2/2013 3:05:45 PM

SGP-12 #900 RT: 4.01 AV: 1 NL: 8.29E8  
T: FTMS + p ESI Full ms [100.00-700.00]

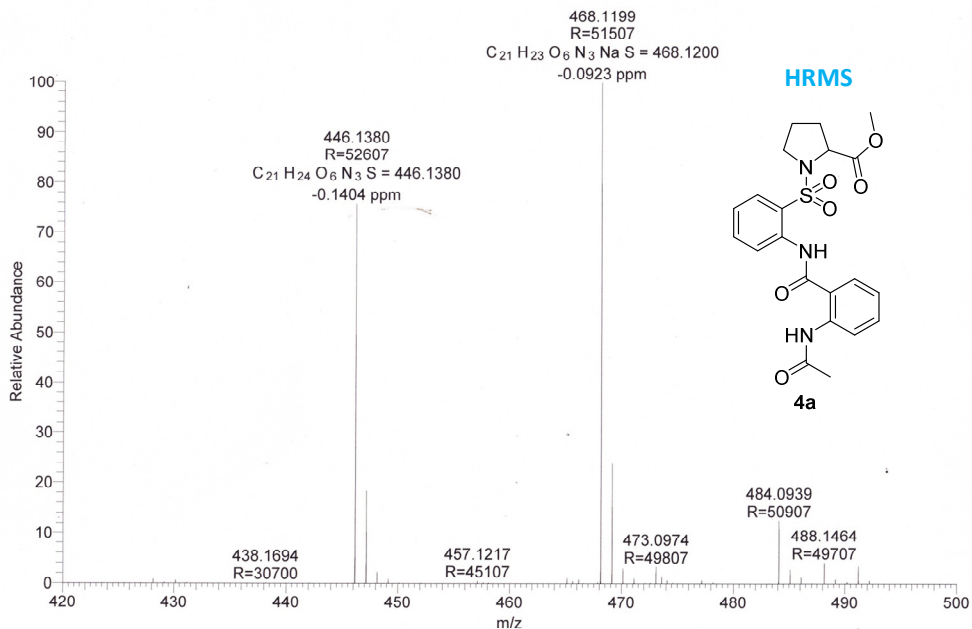

D:\Data\SGP-64

2/7/2013 12:42:30 PM

SGP-64 #917 RT: 4.08 AV: 1 NL: 2.18E8  
T: FTMS + p ESI Full ms [100.00-700.00]

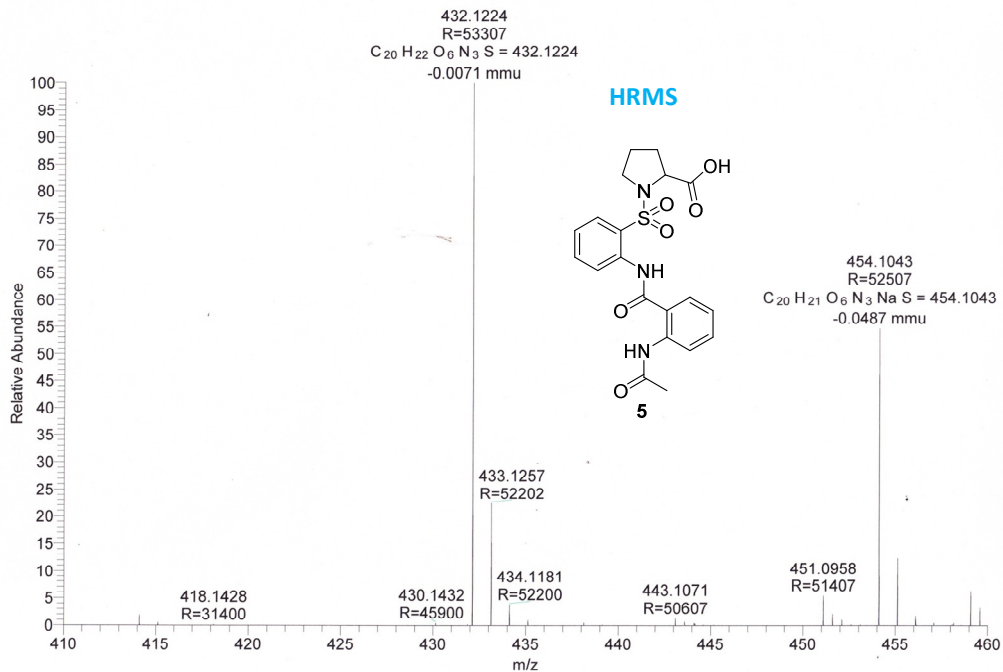

Note: The stereochemistry of prolines in **4a** and **5** is 'S'

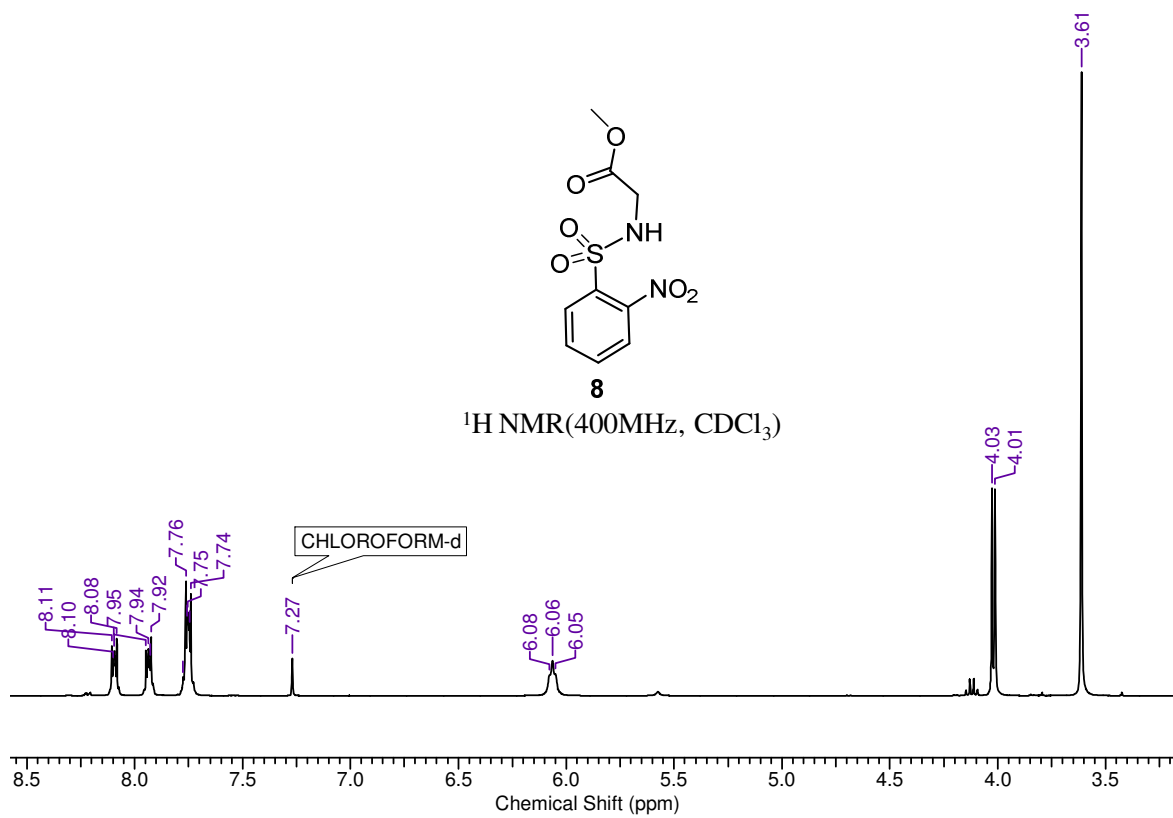

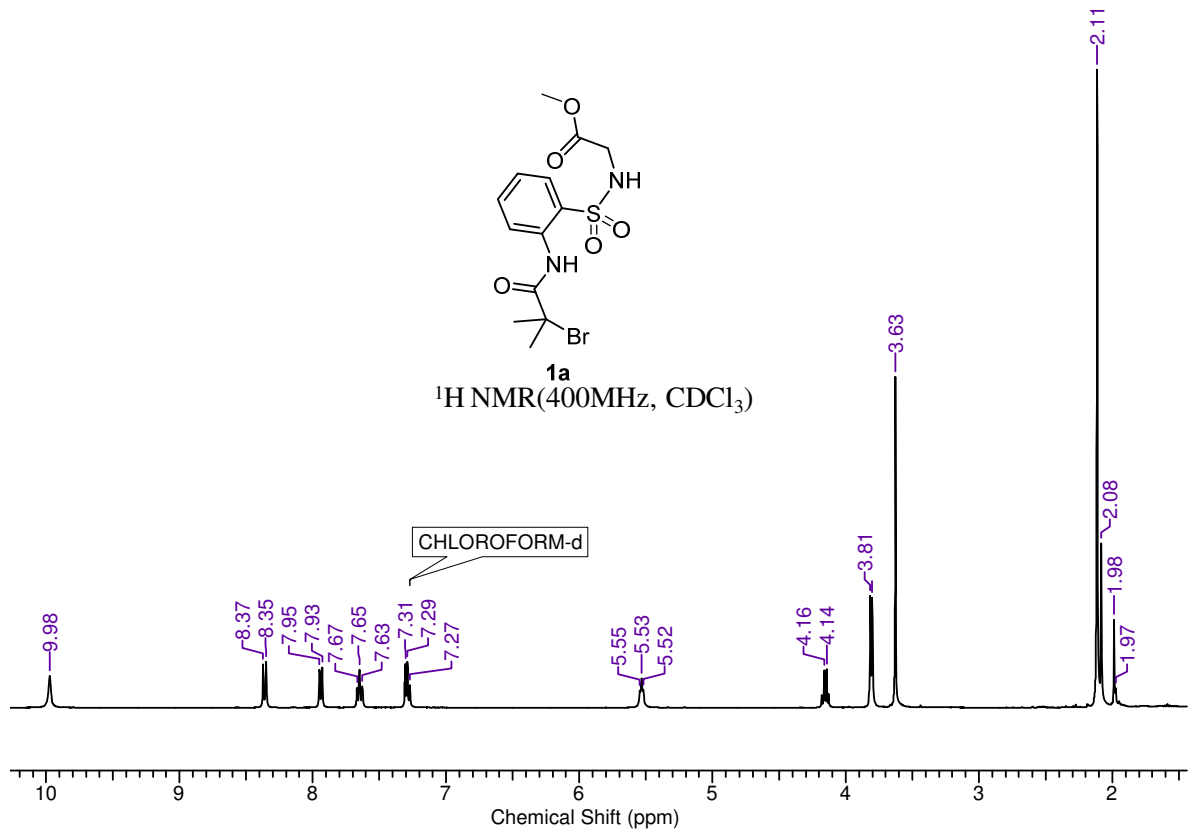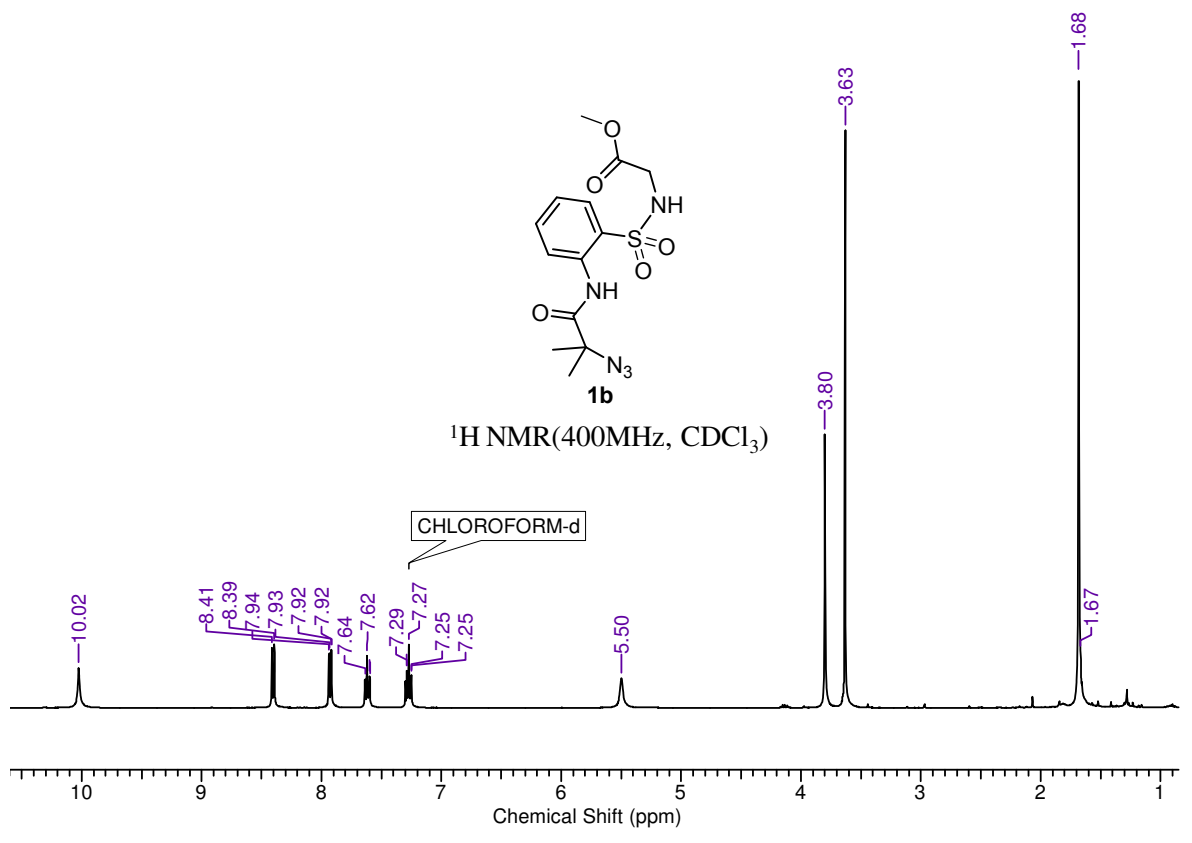

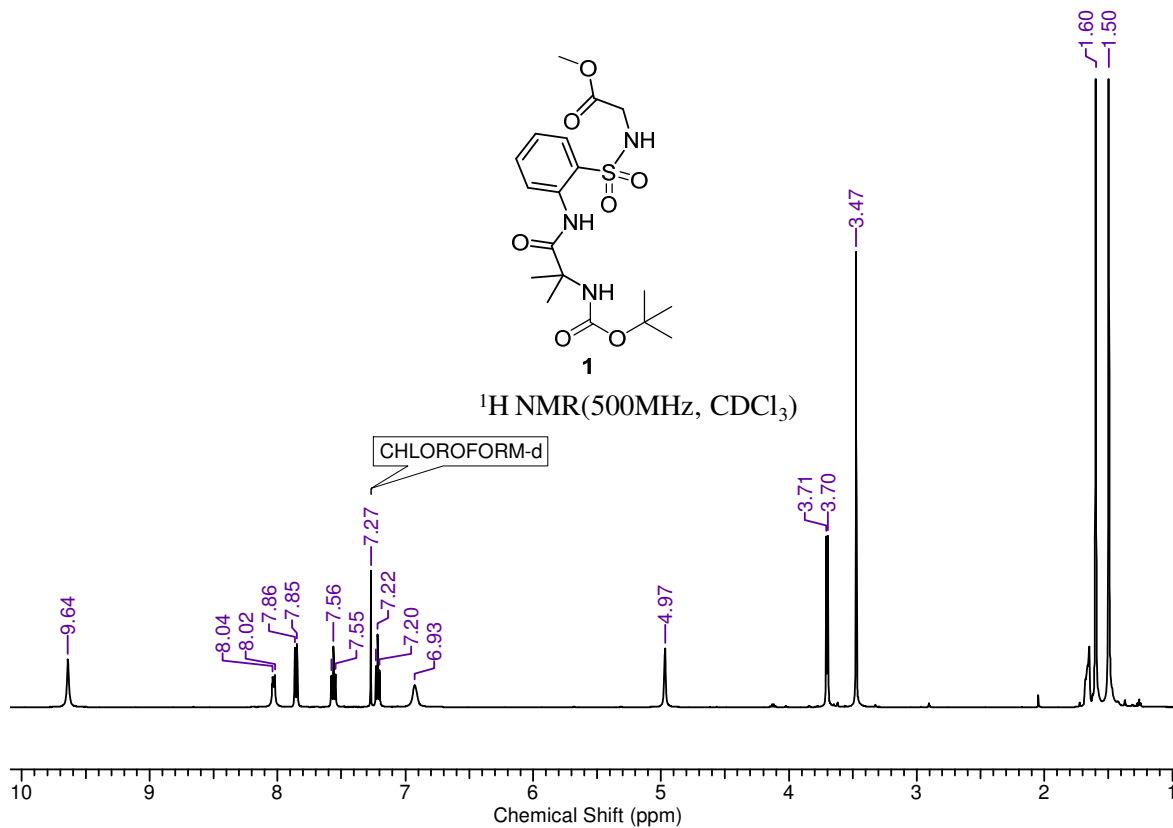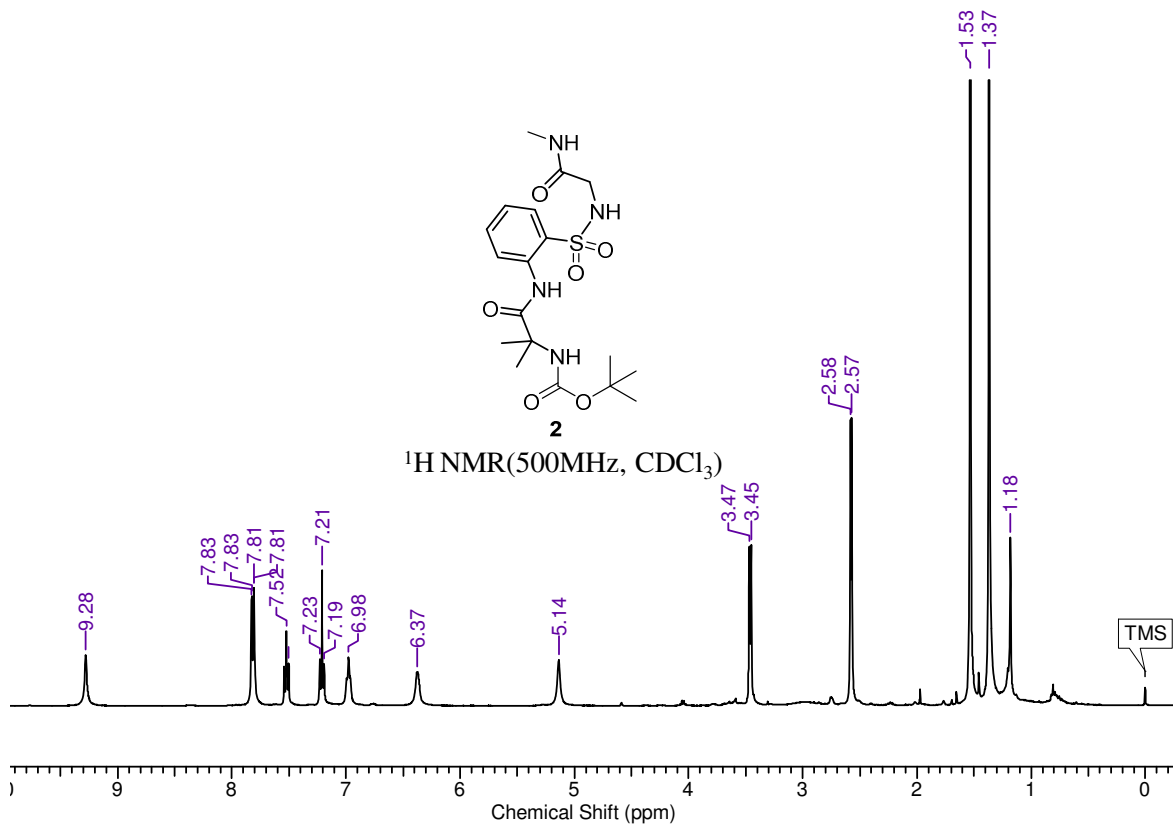

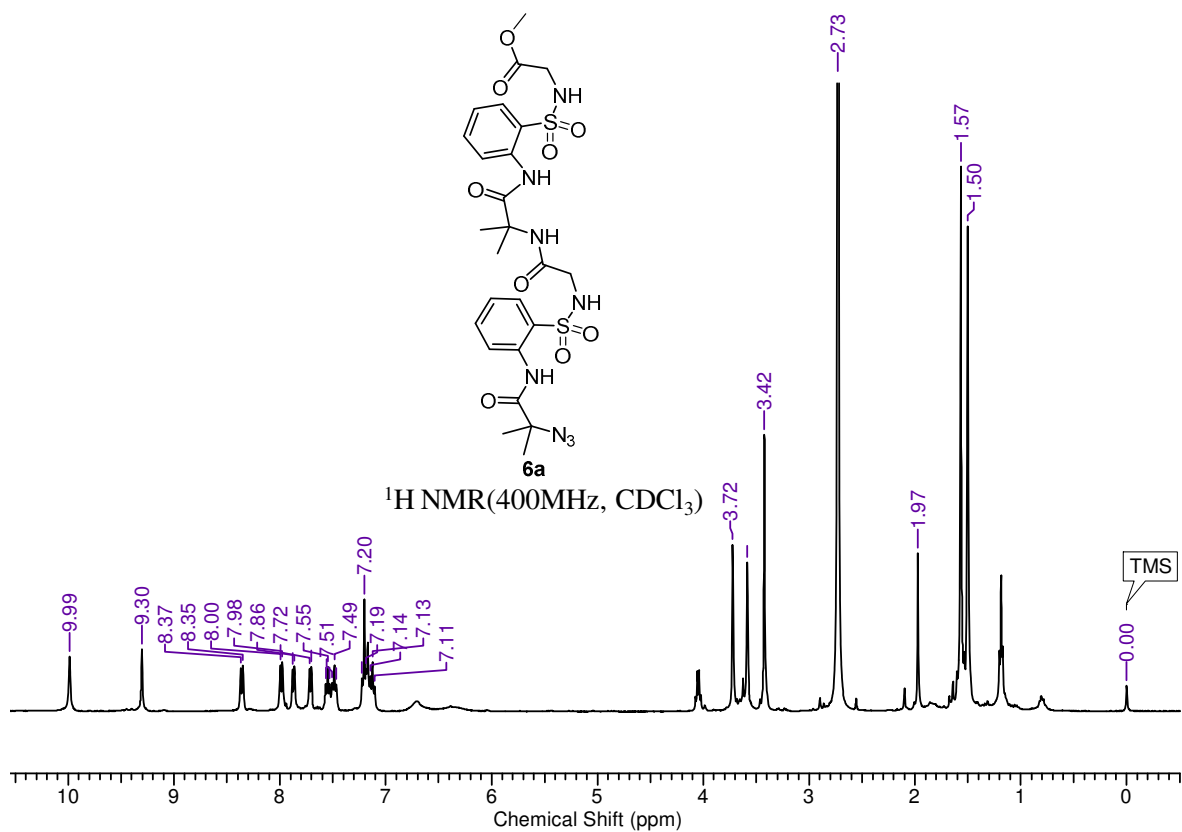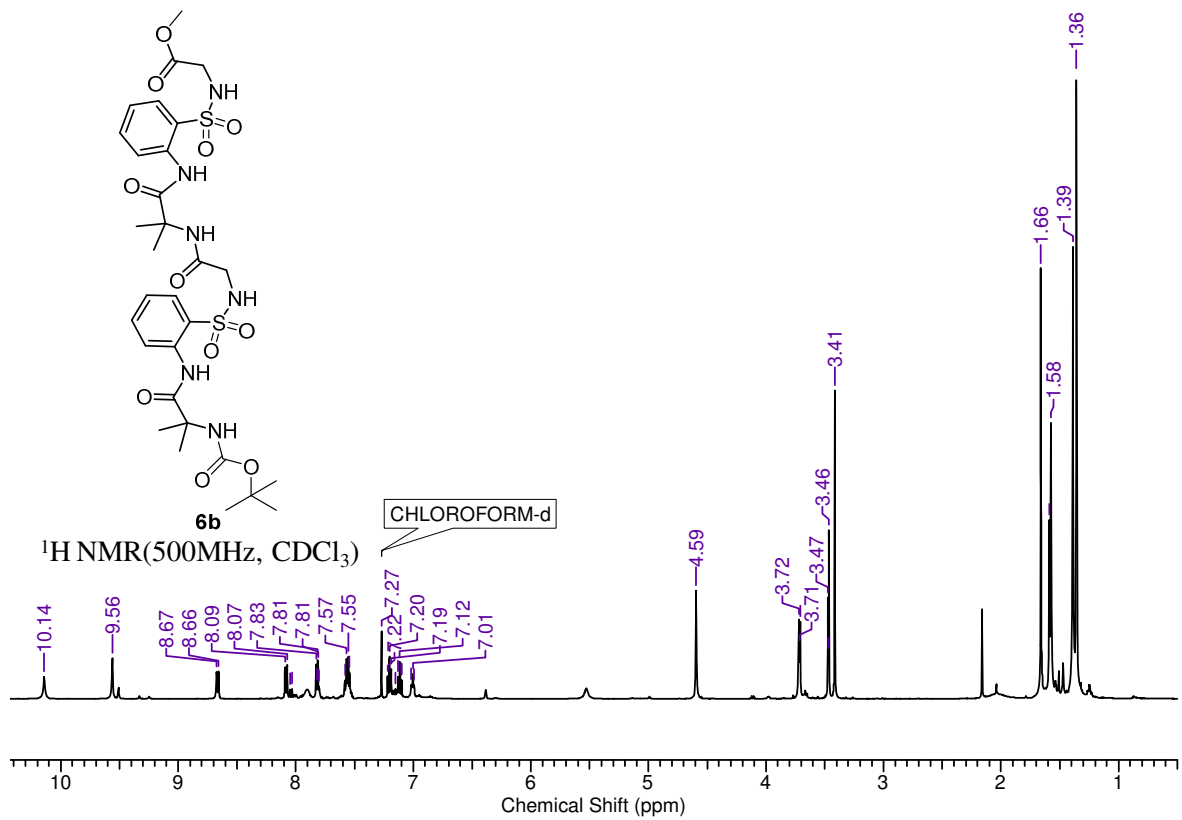

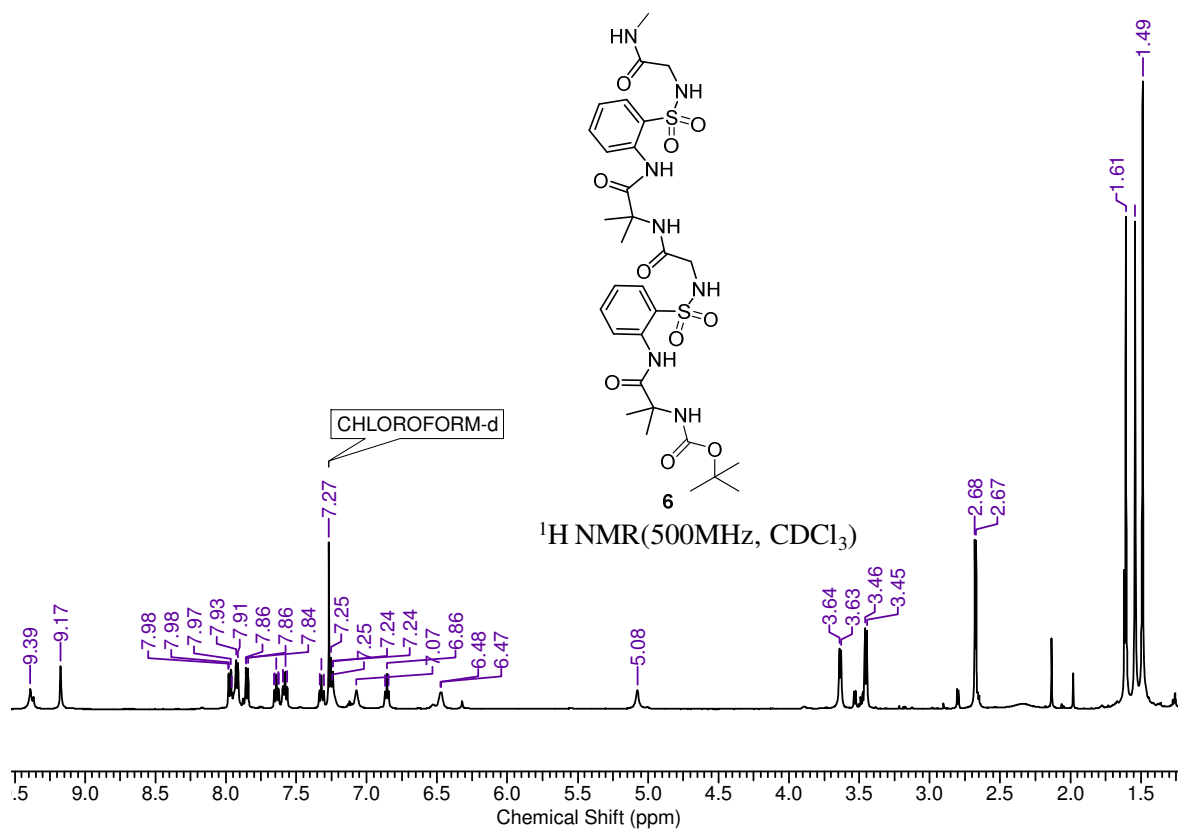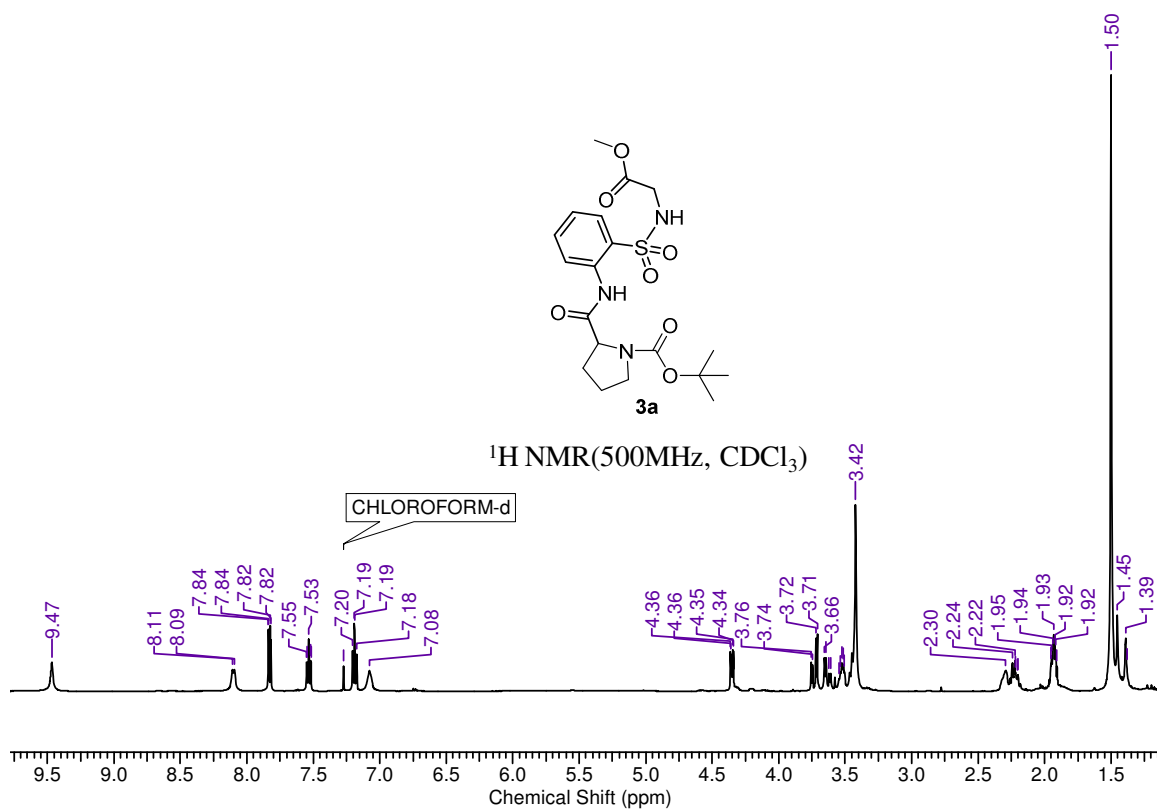

*Note:* The stereochemistry of prolines in **3a** is 'S'

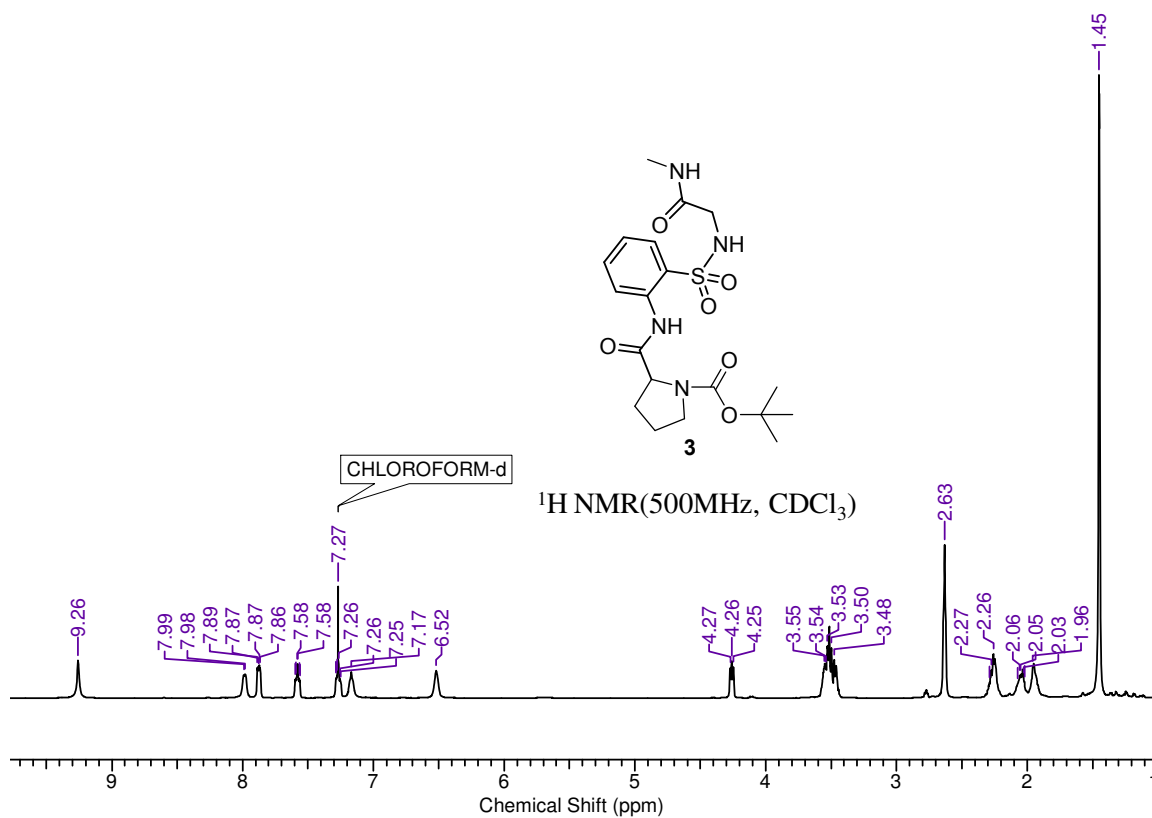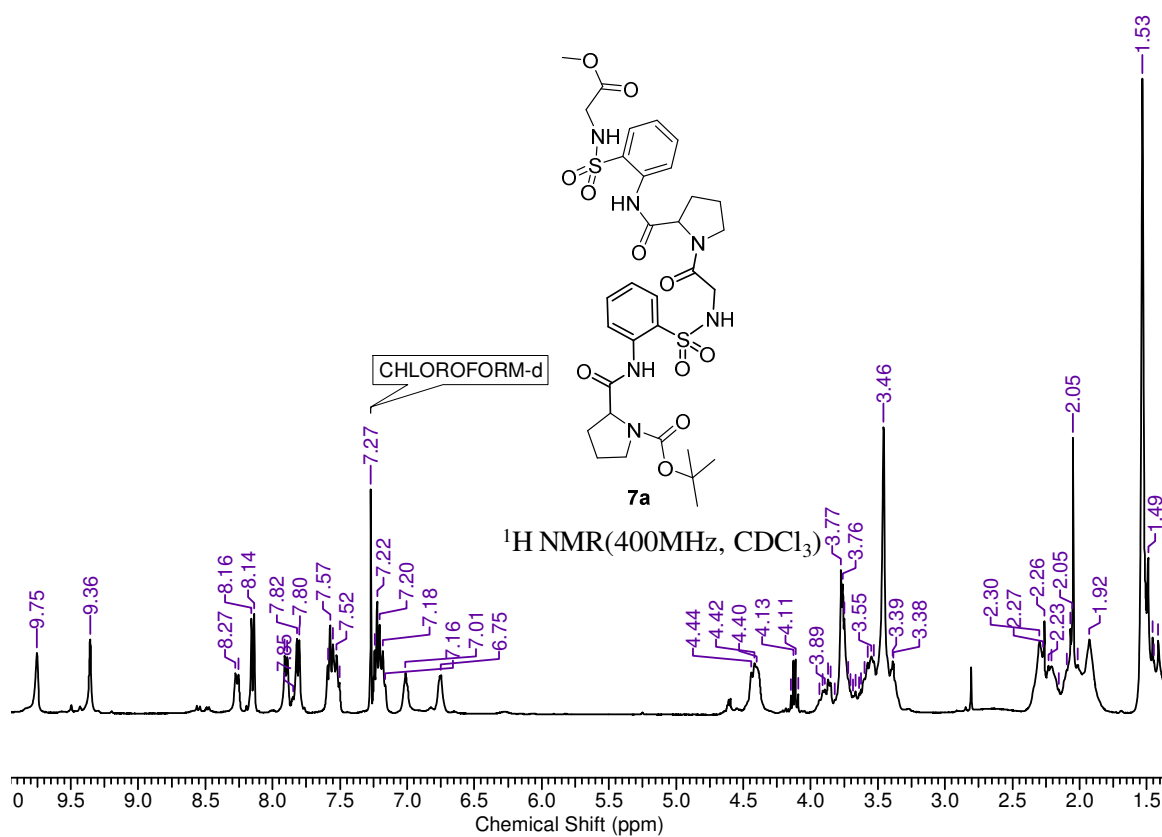

*Note:* The stereochemistry of prolines in **7a** and **3** is 'S'

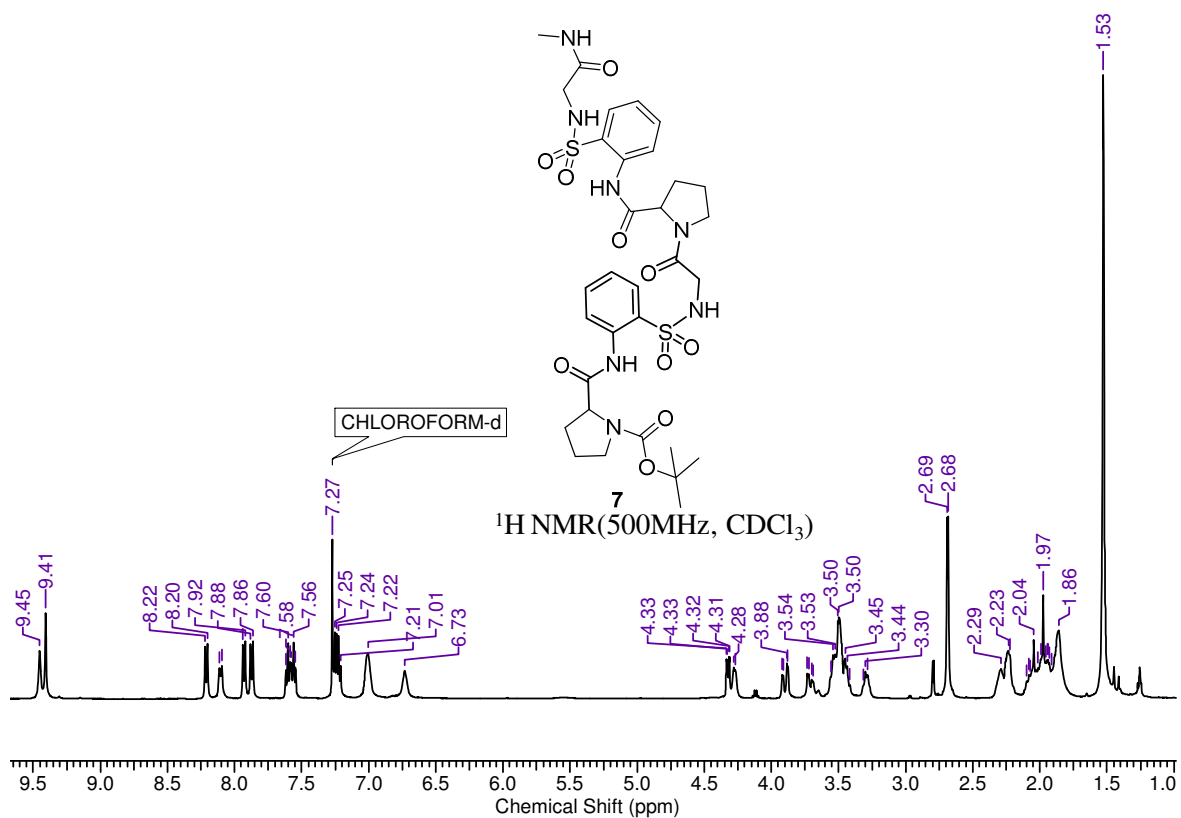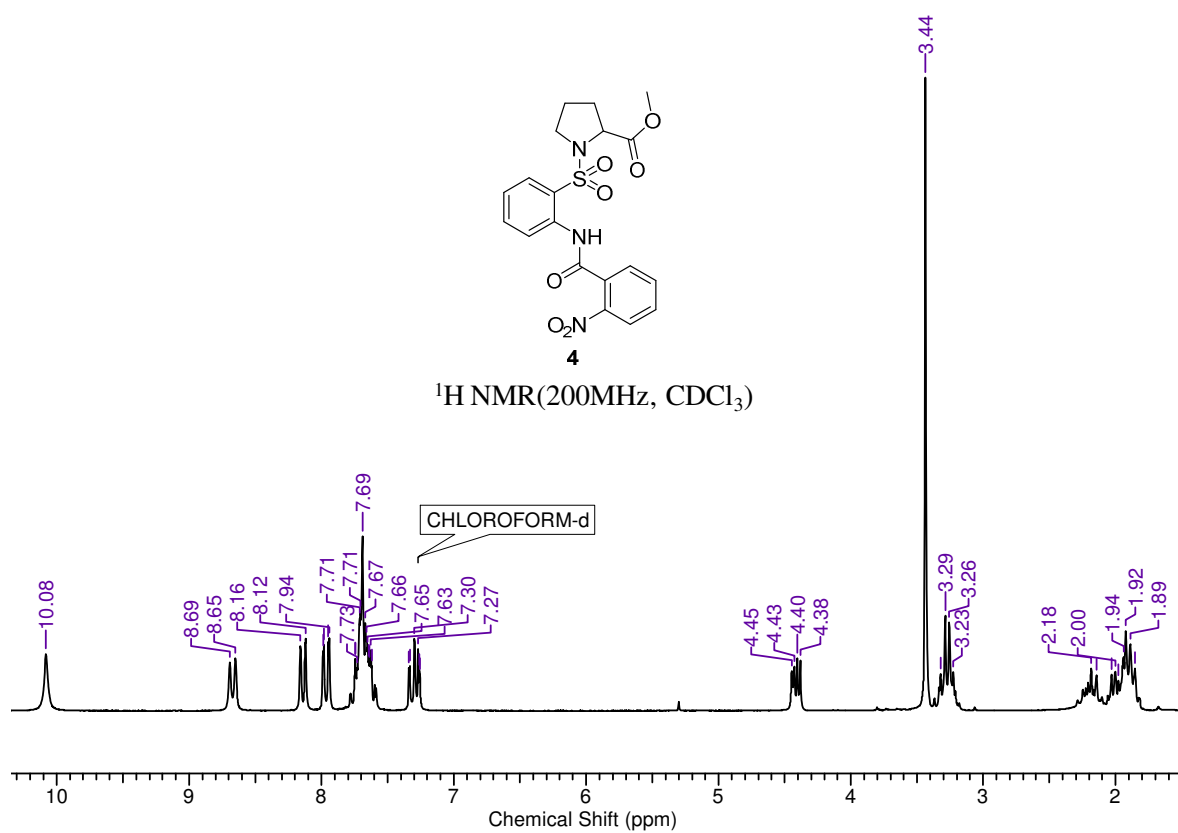

*Note:* The stereochemistry of prolines in **7** and **4** is 'S'



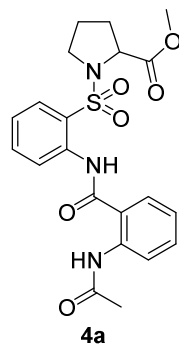

$^1\text{H NMR}$  (500MHz,  $\text{CDCl}_3$ )

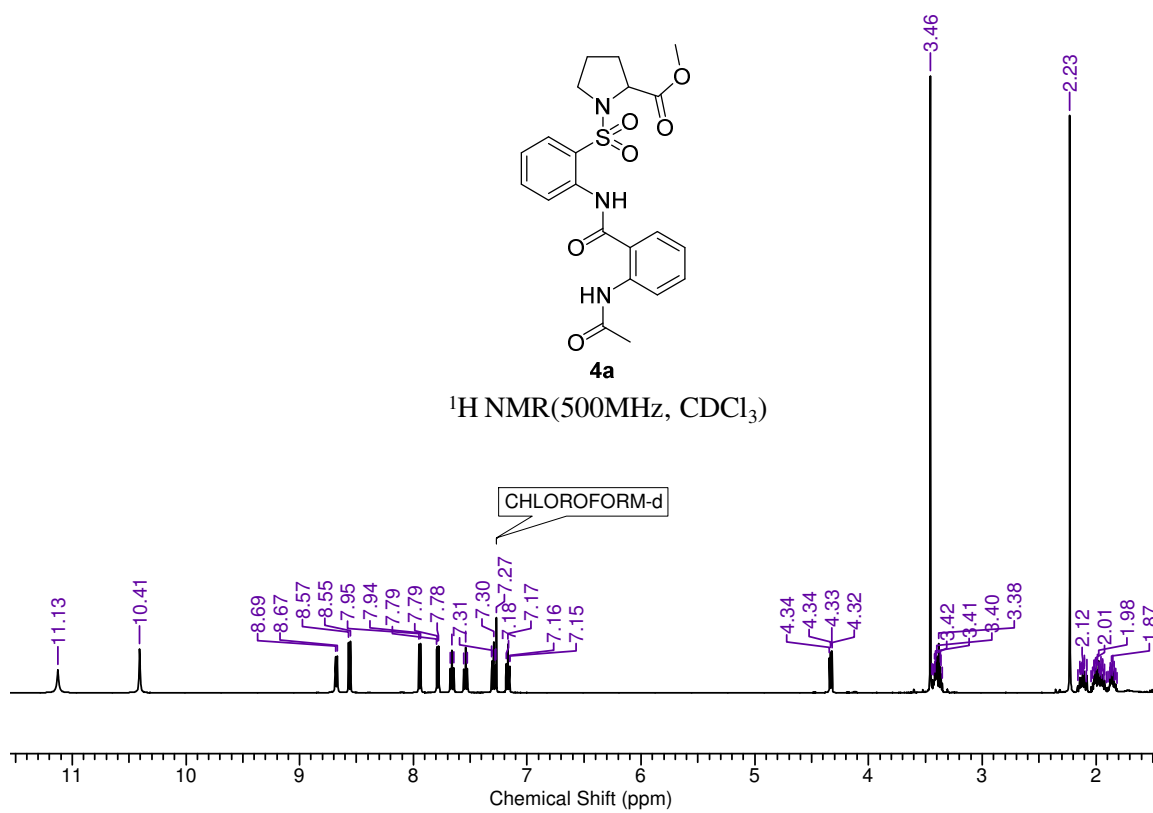

*Note:* The stereochemistry of prolines in **4a** is 'S'

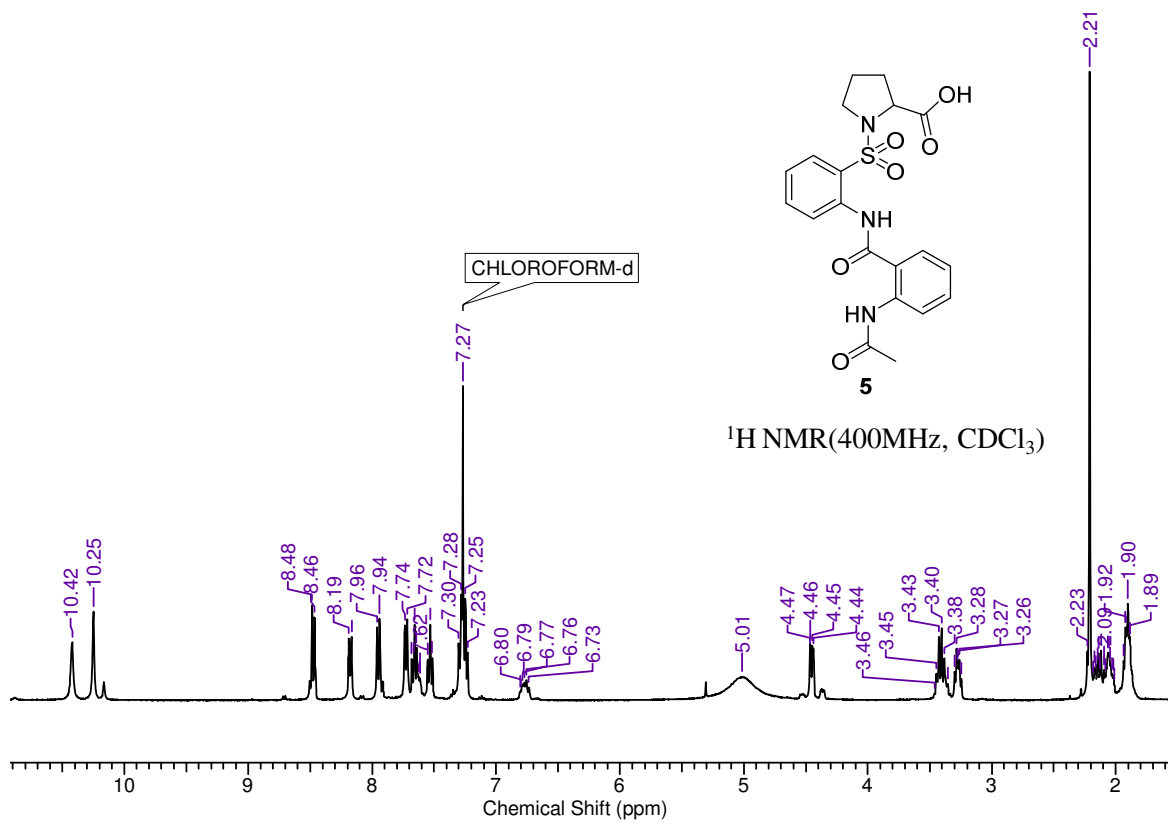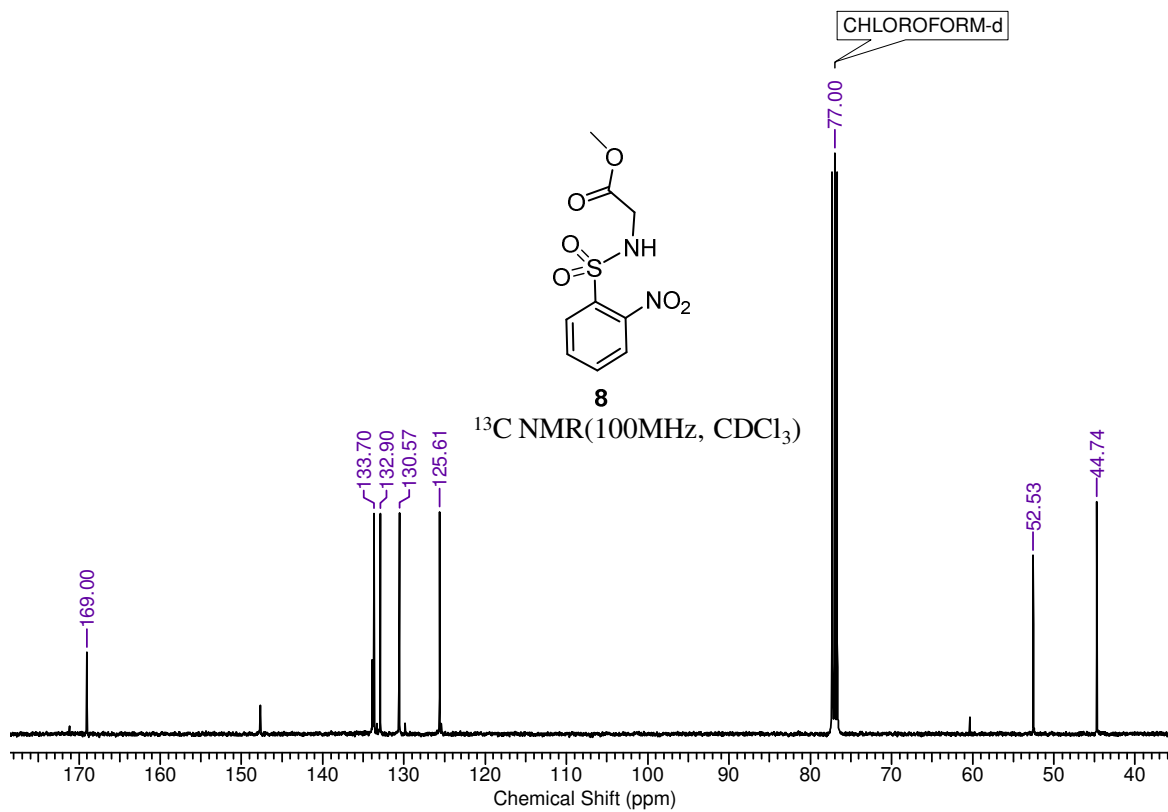

*Note:* The stereochemistry of prolines in **5** is 'S'

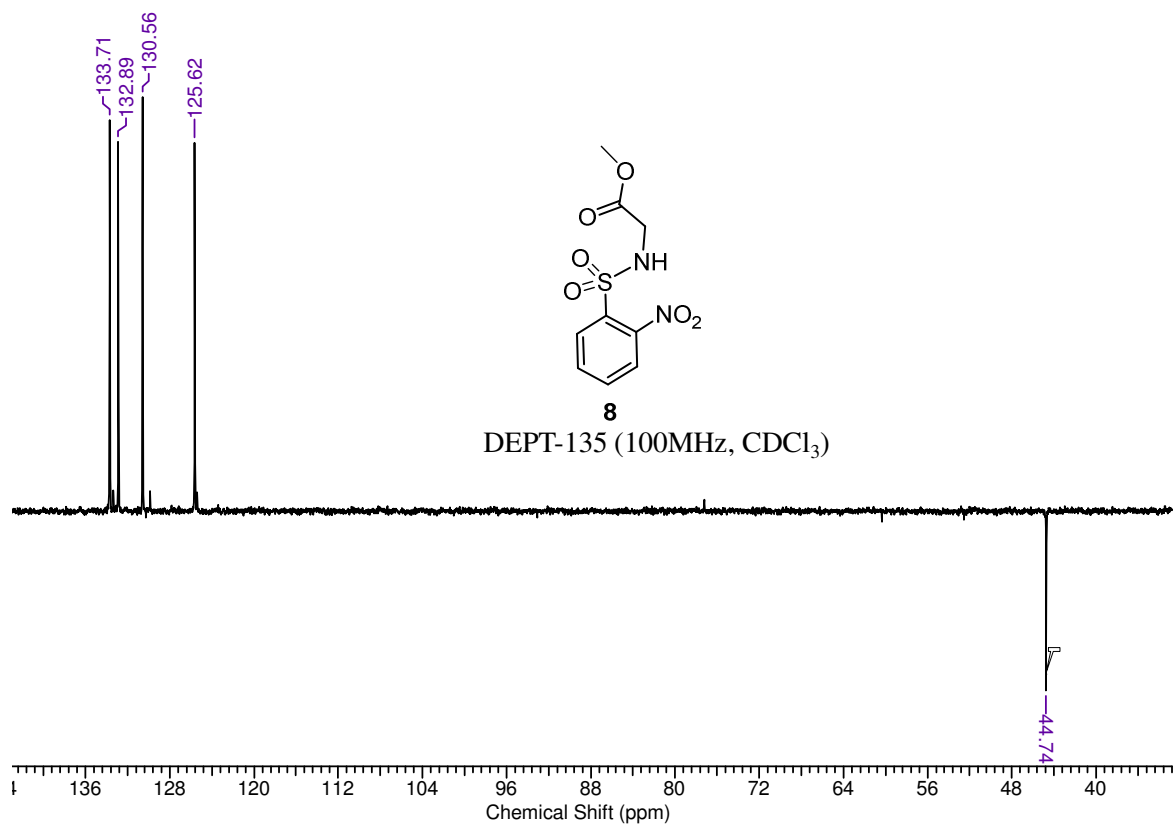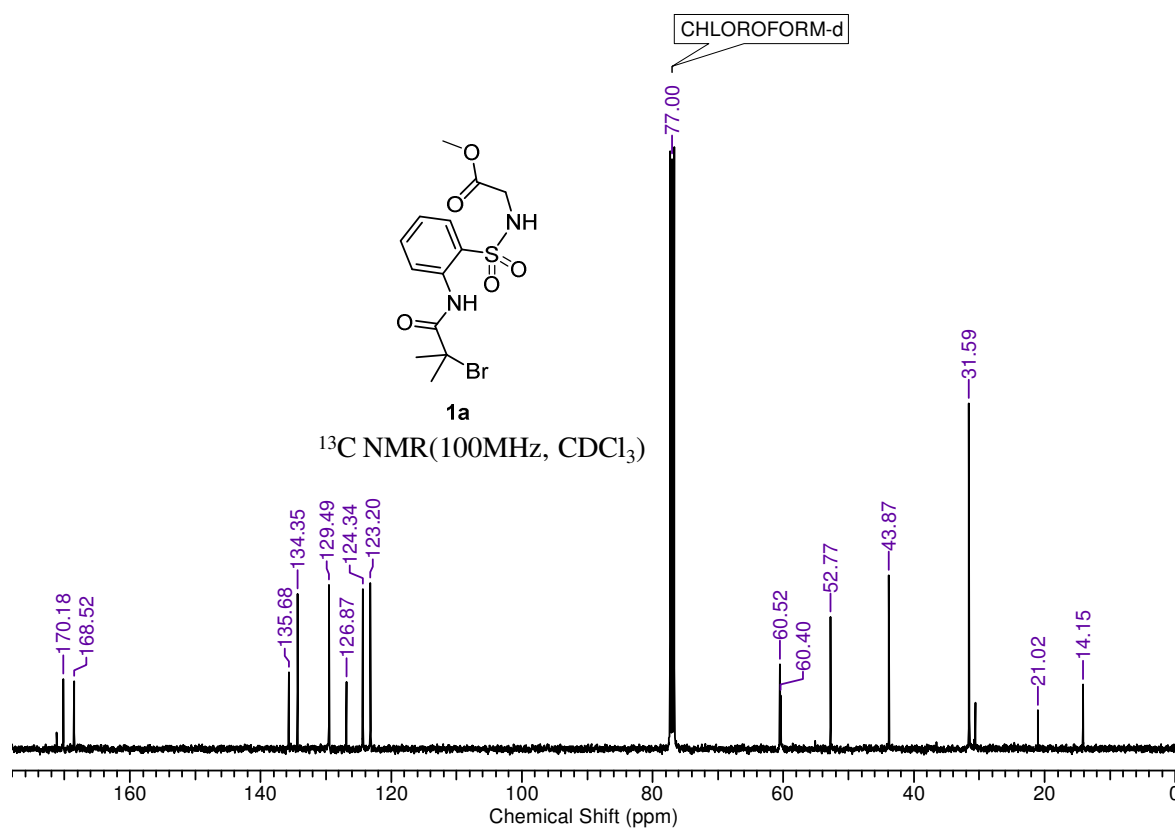

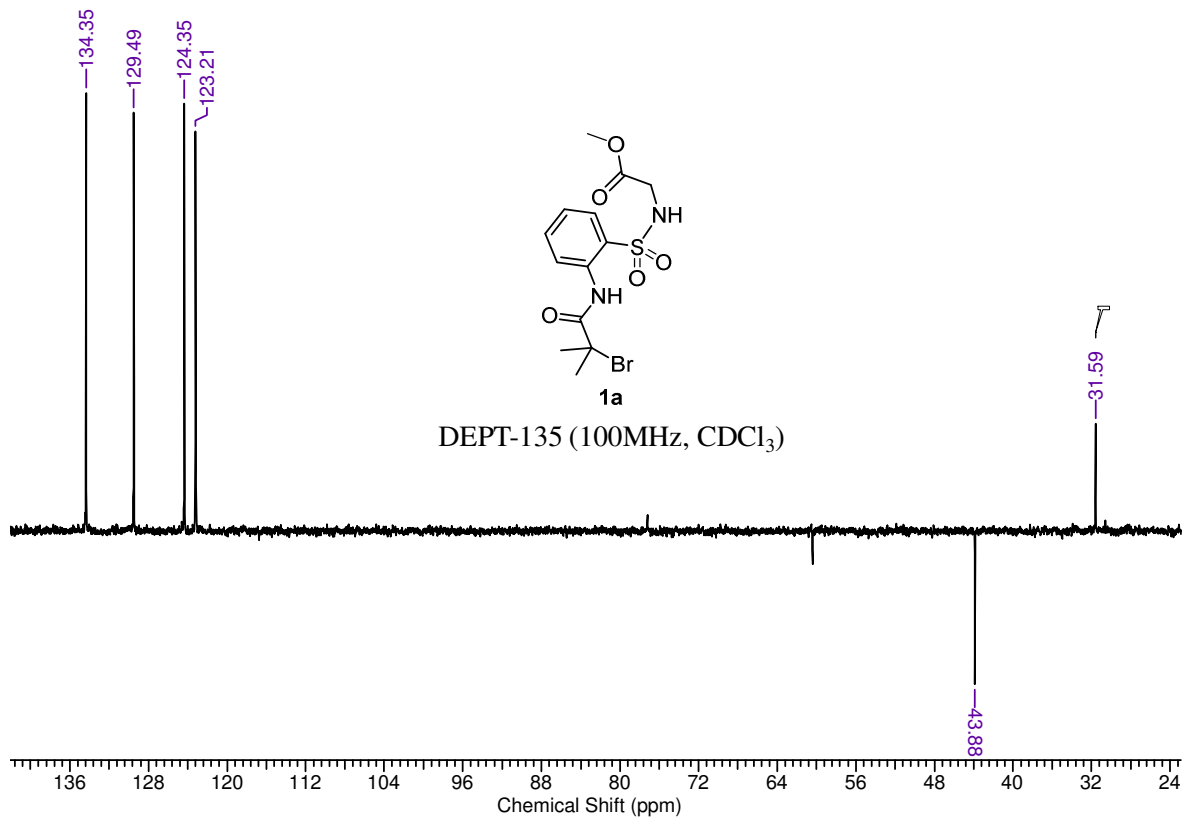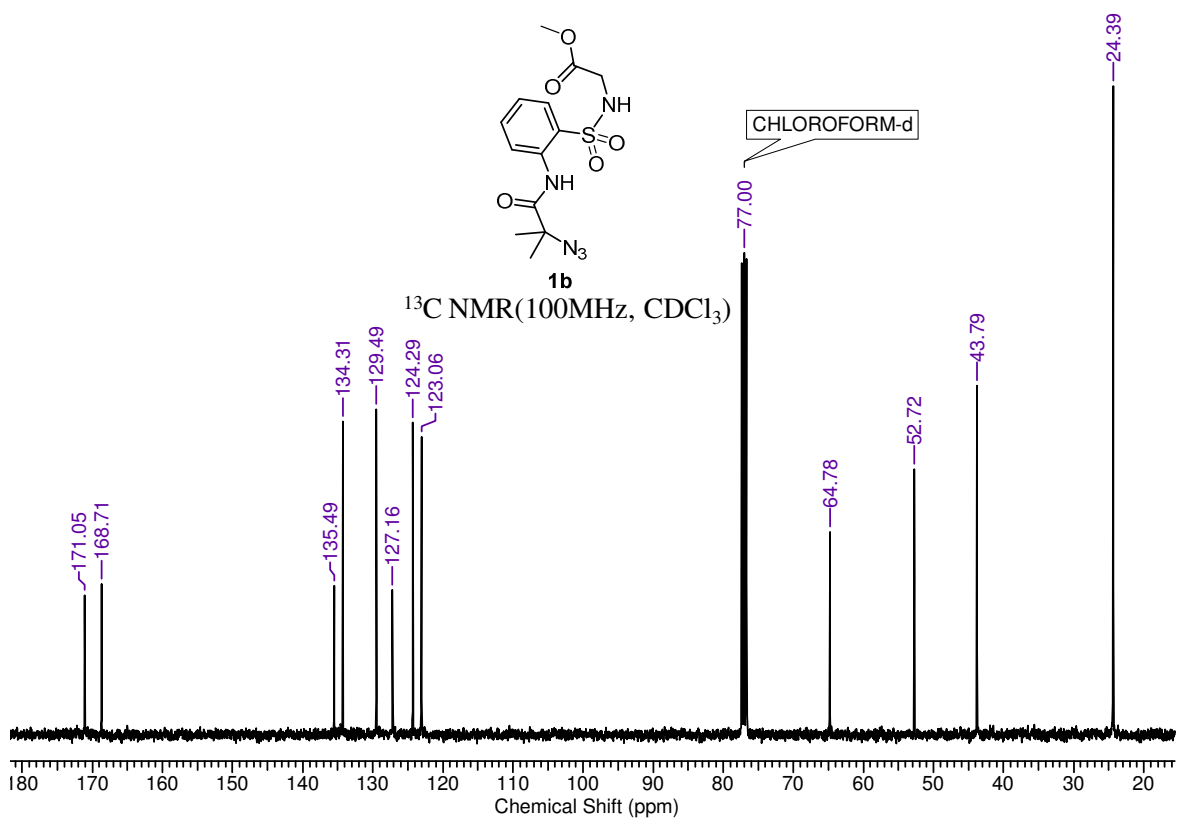

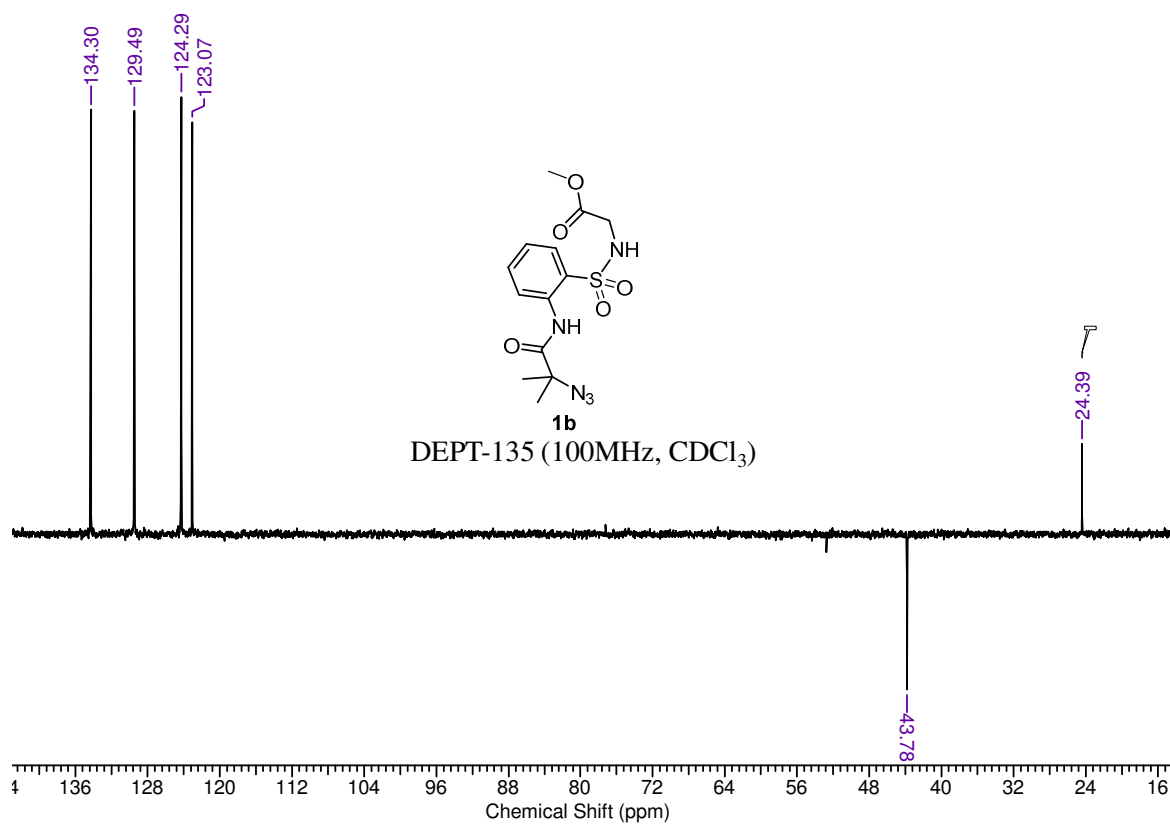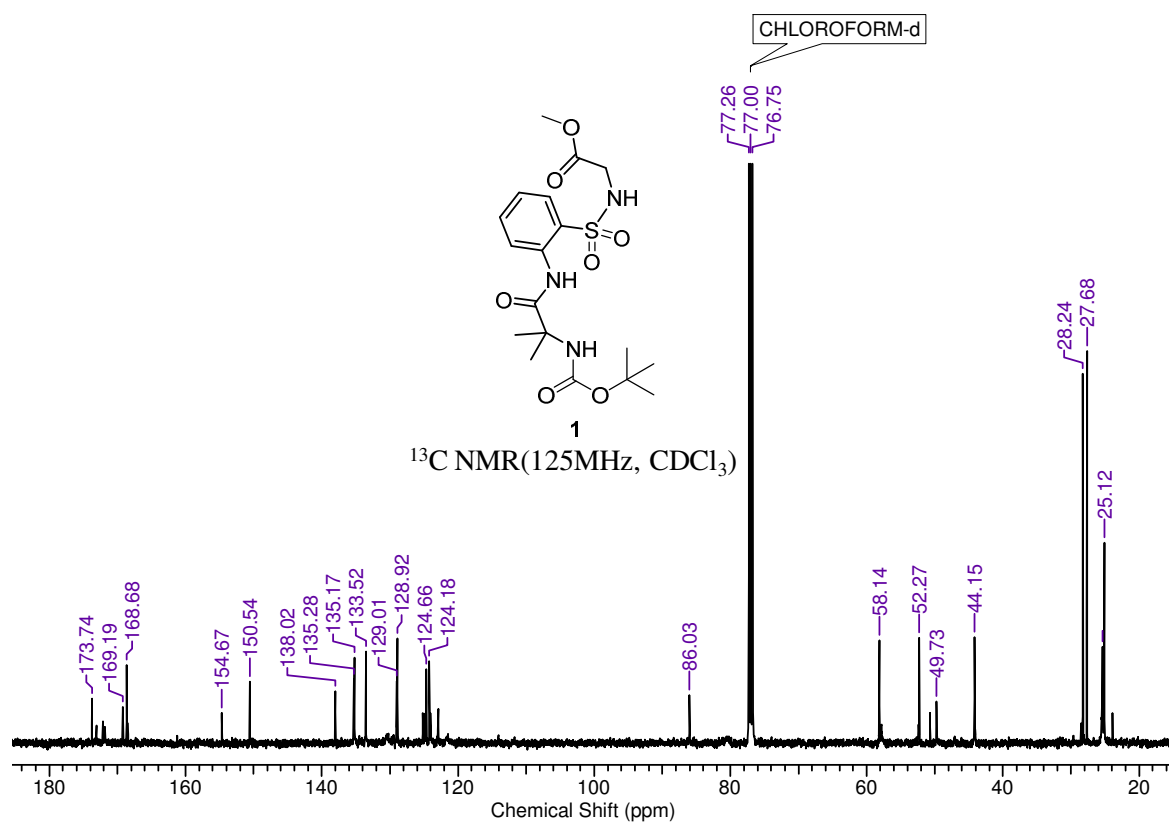

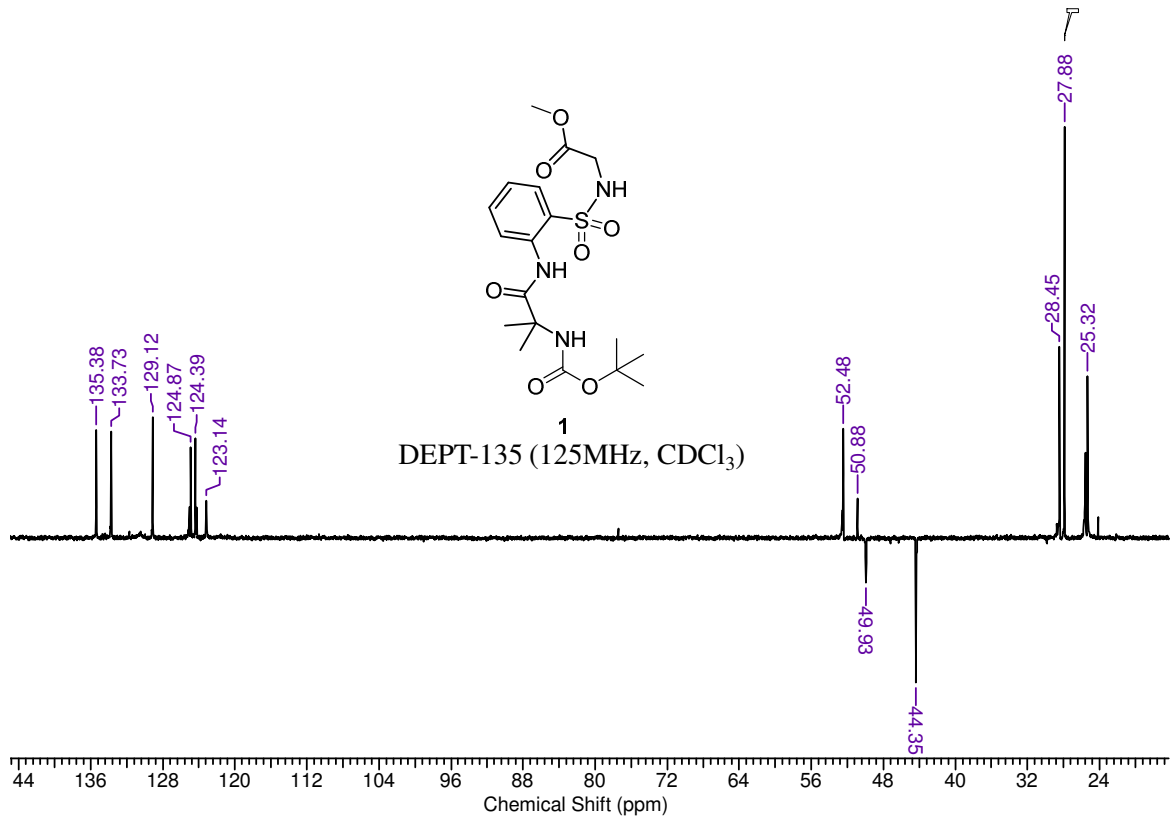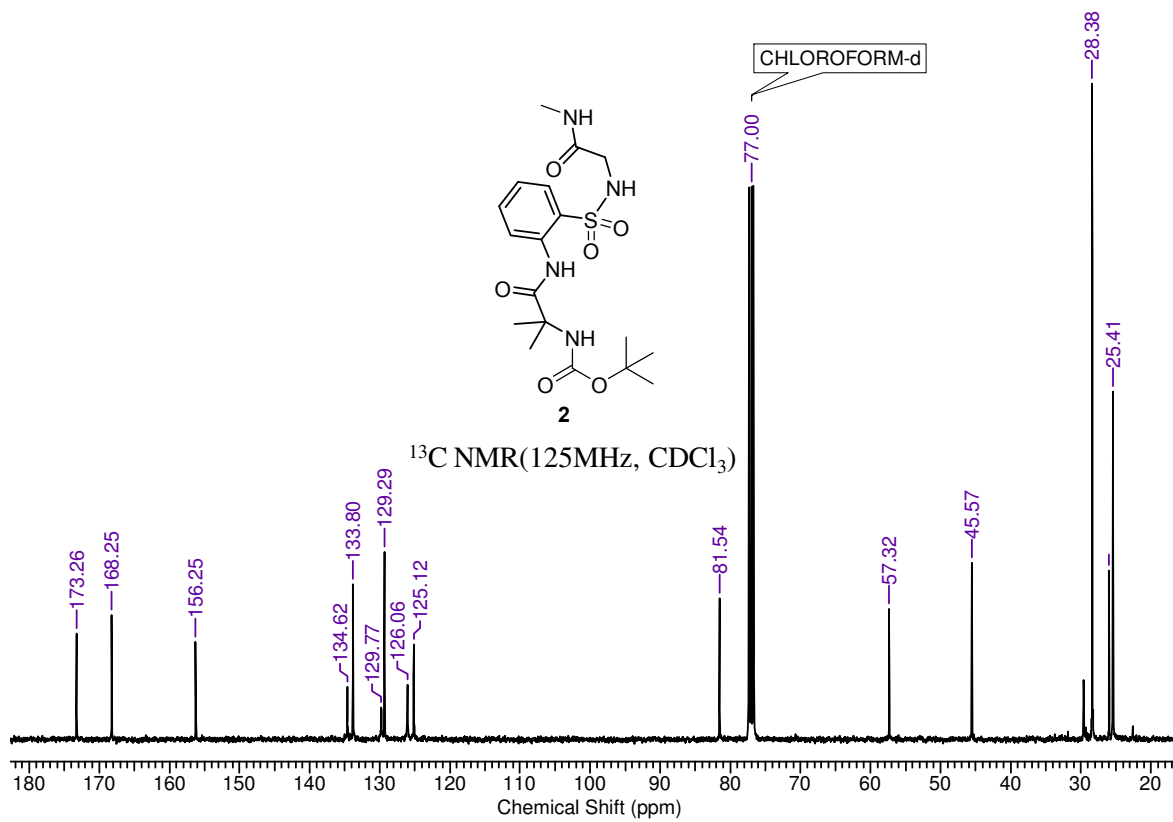

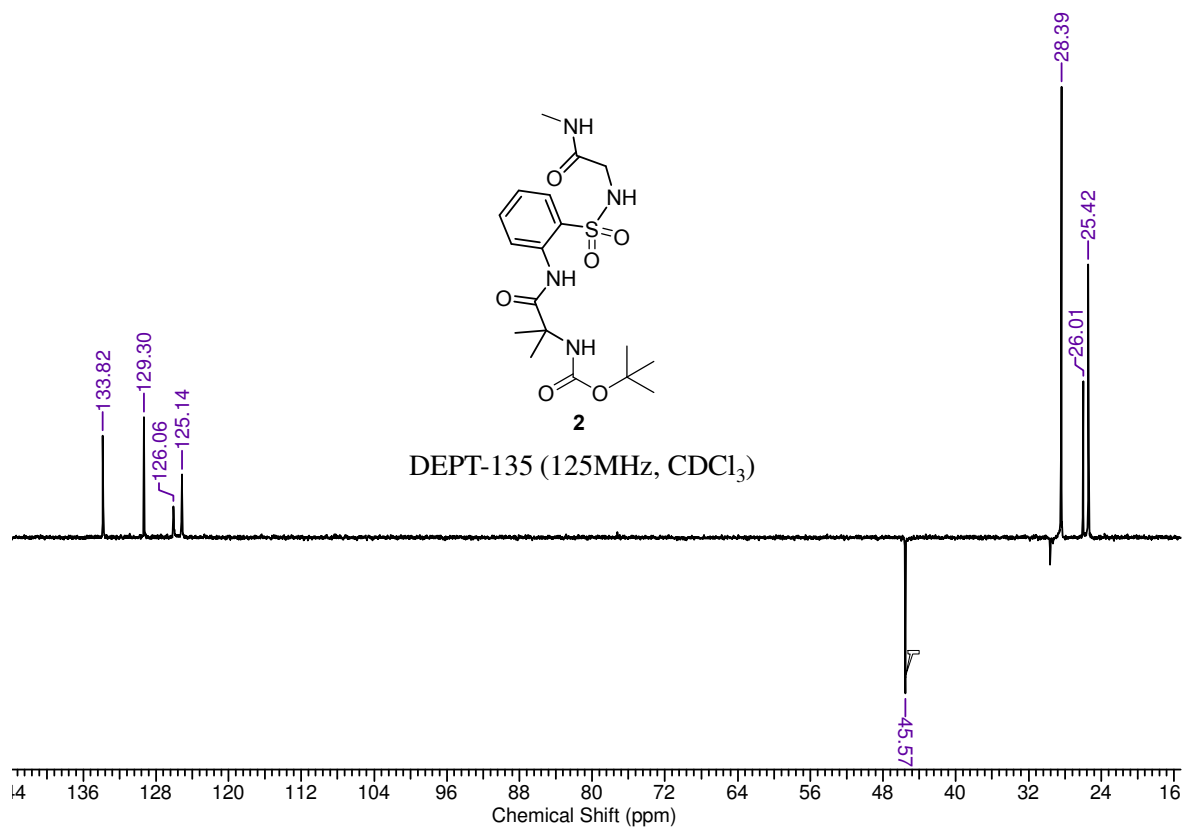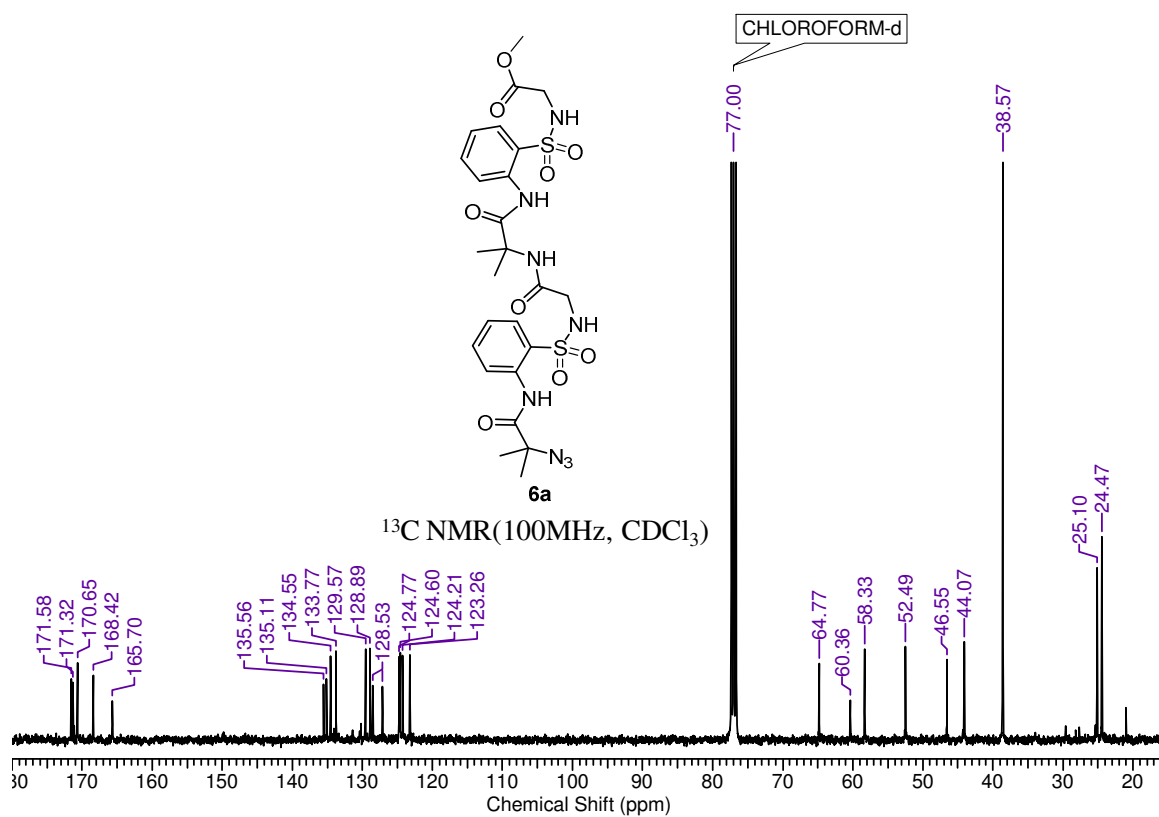

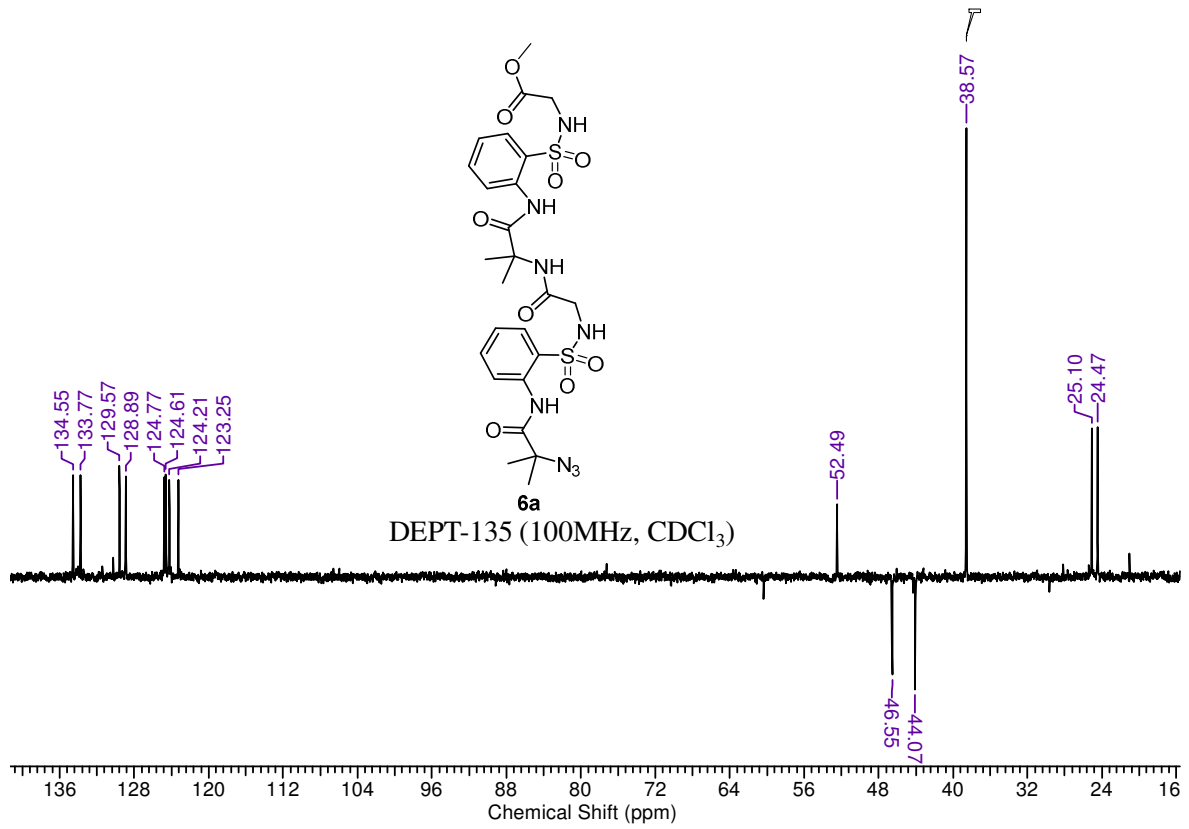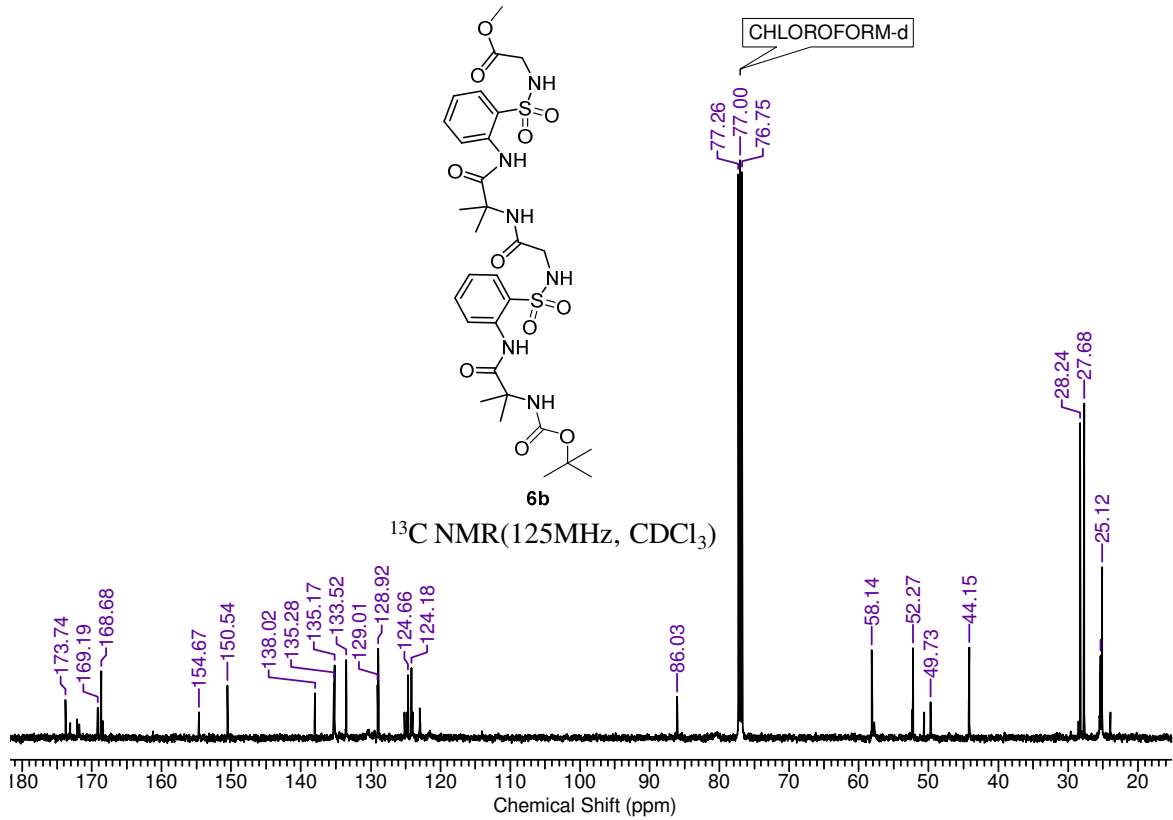



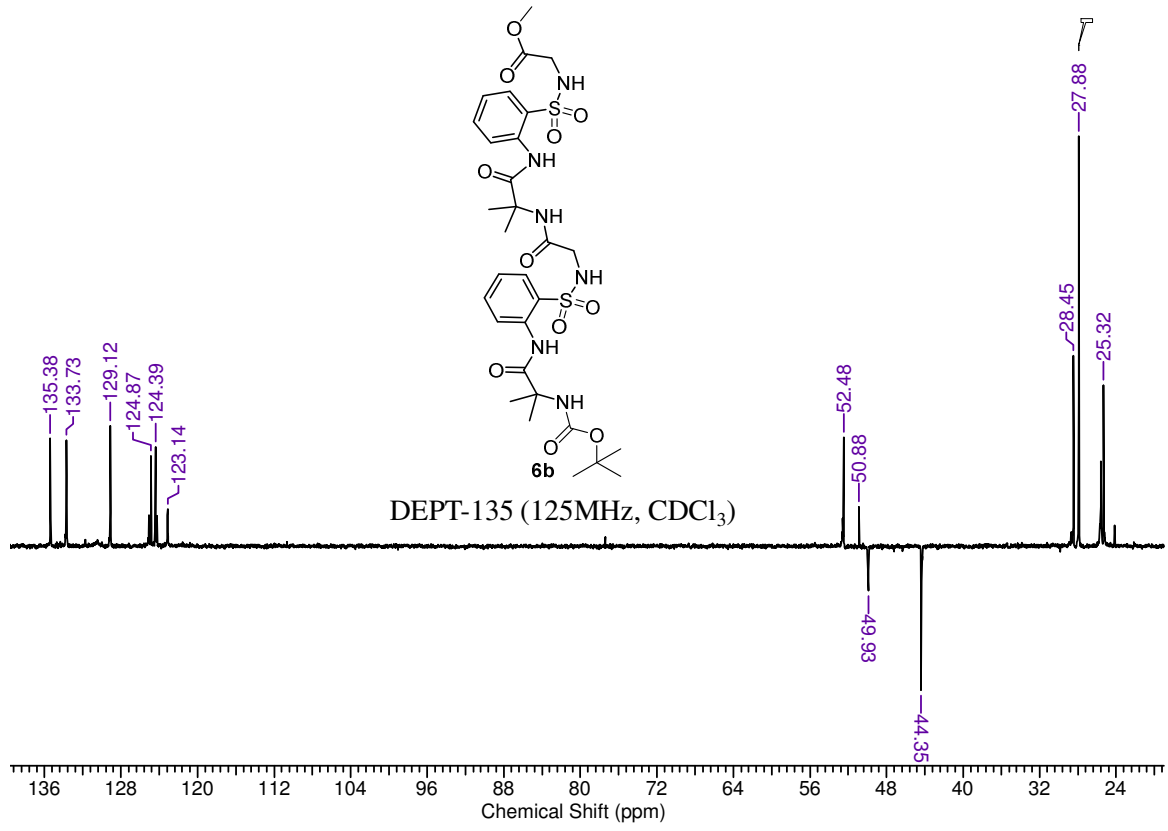

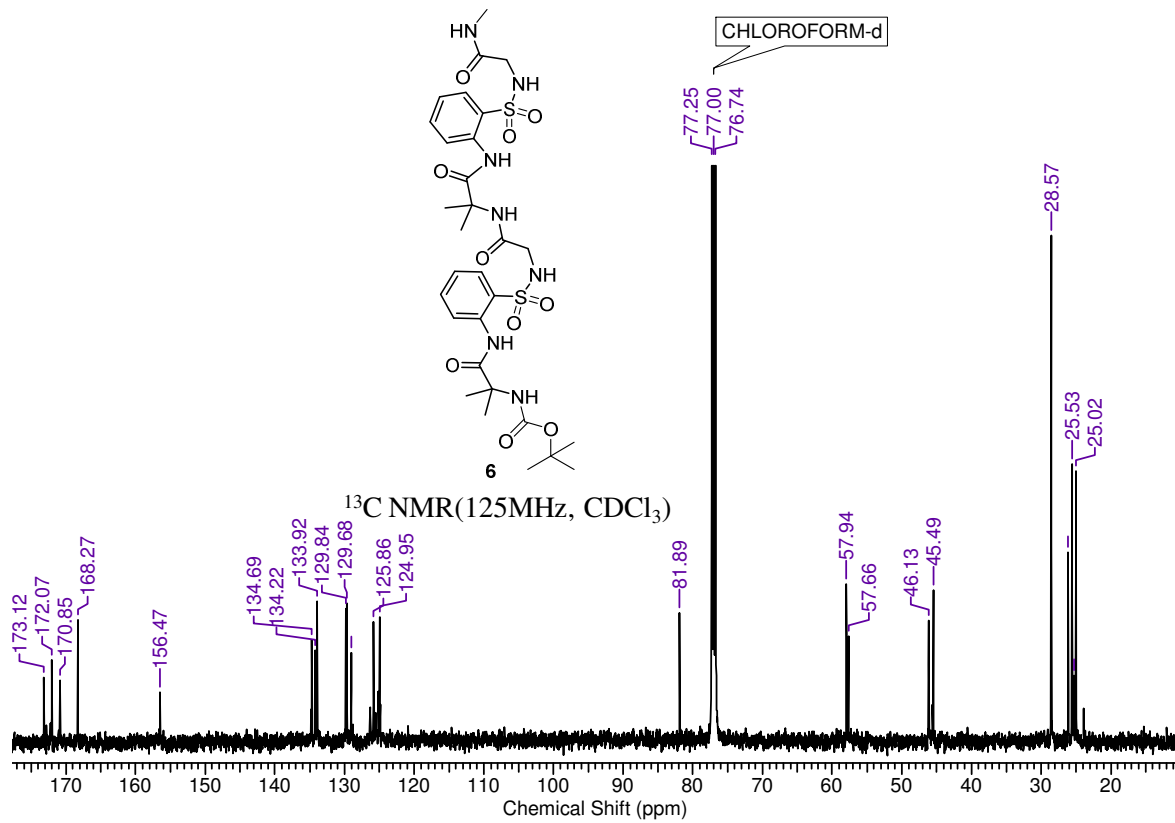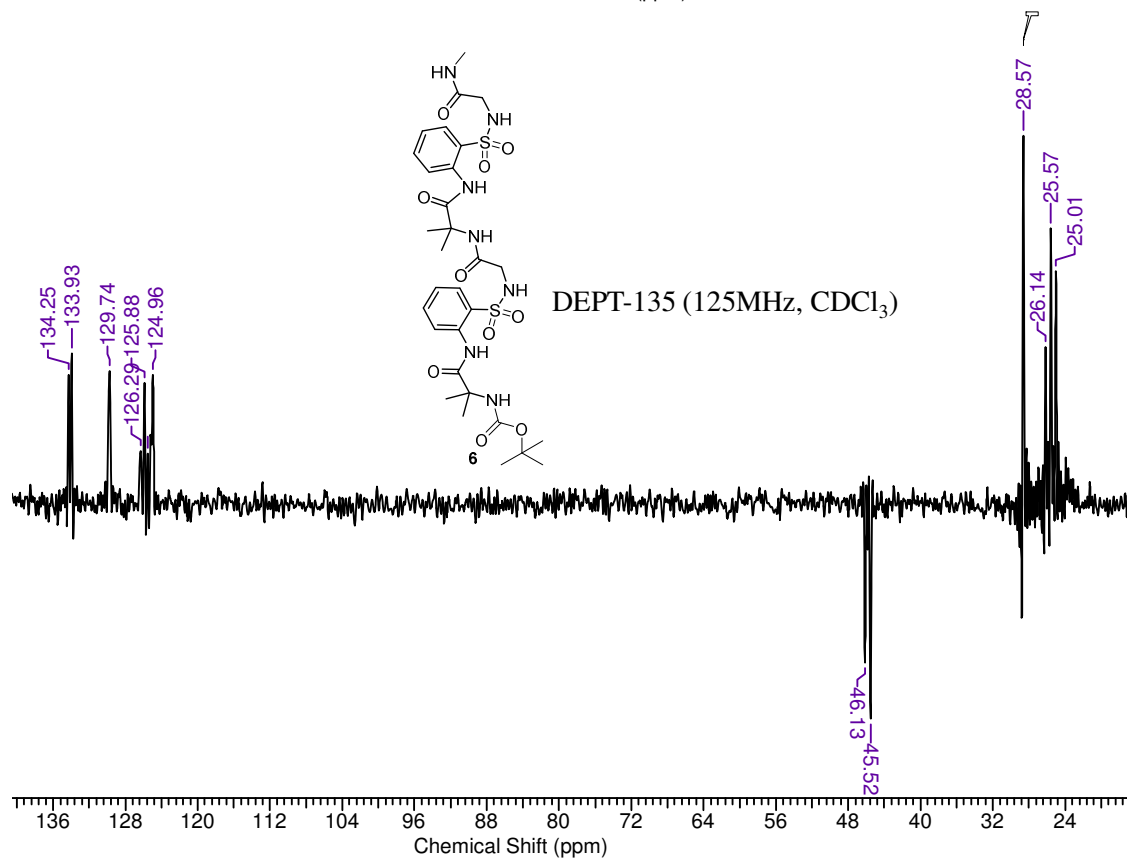

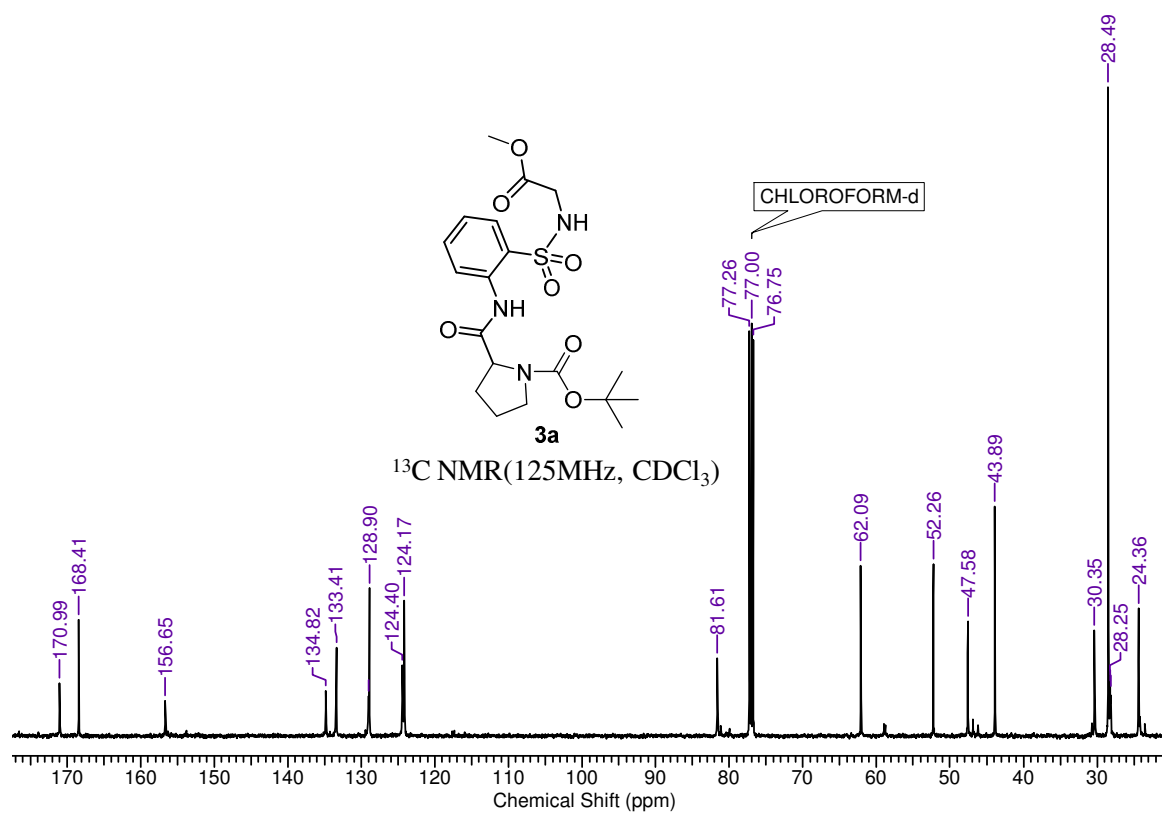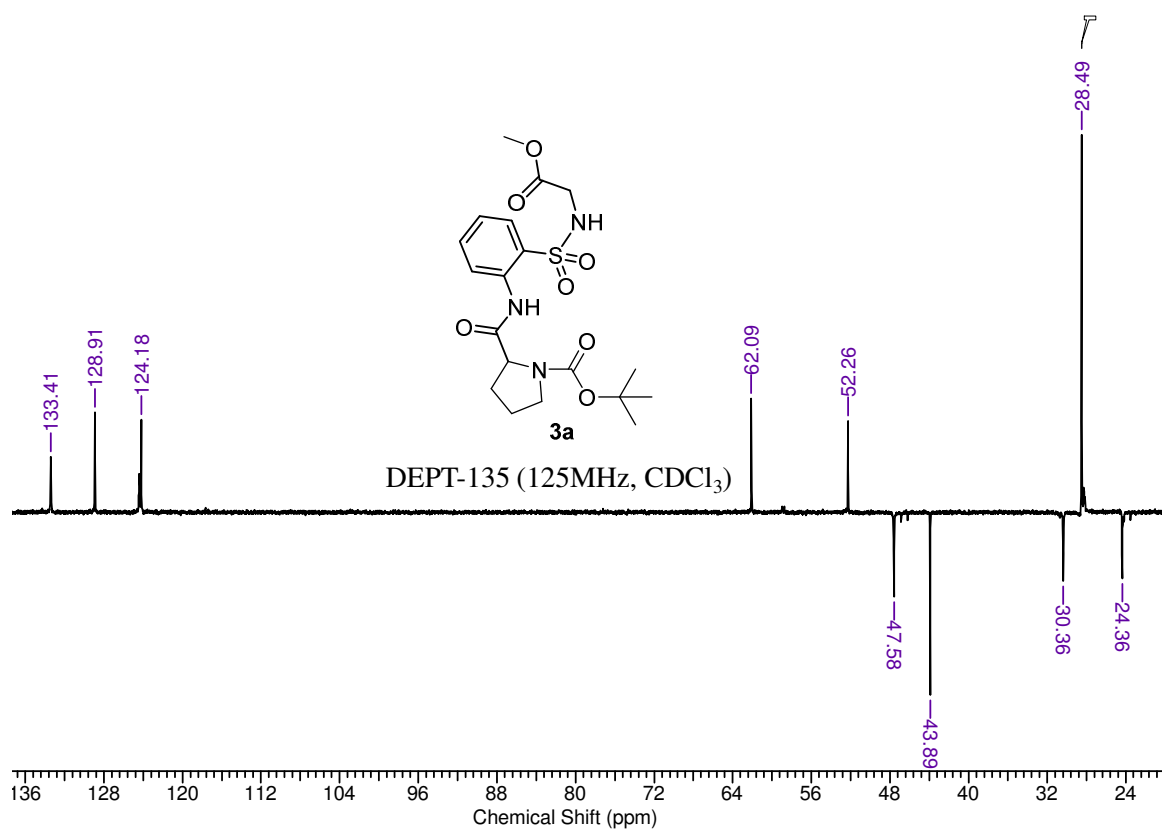

Note: The stereochemistry of prolines in **3a** is 'S'

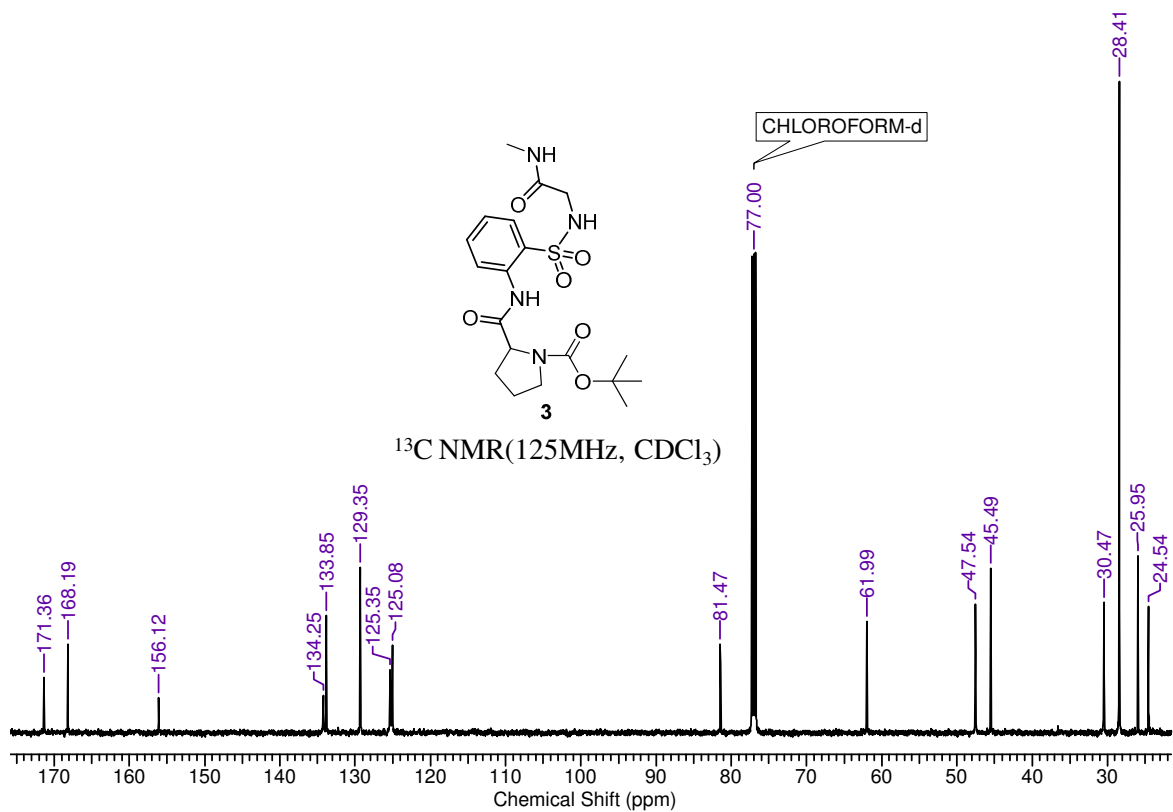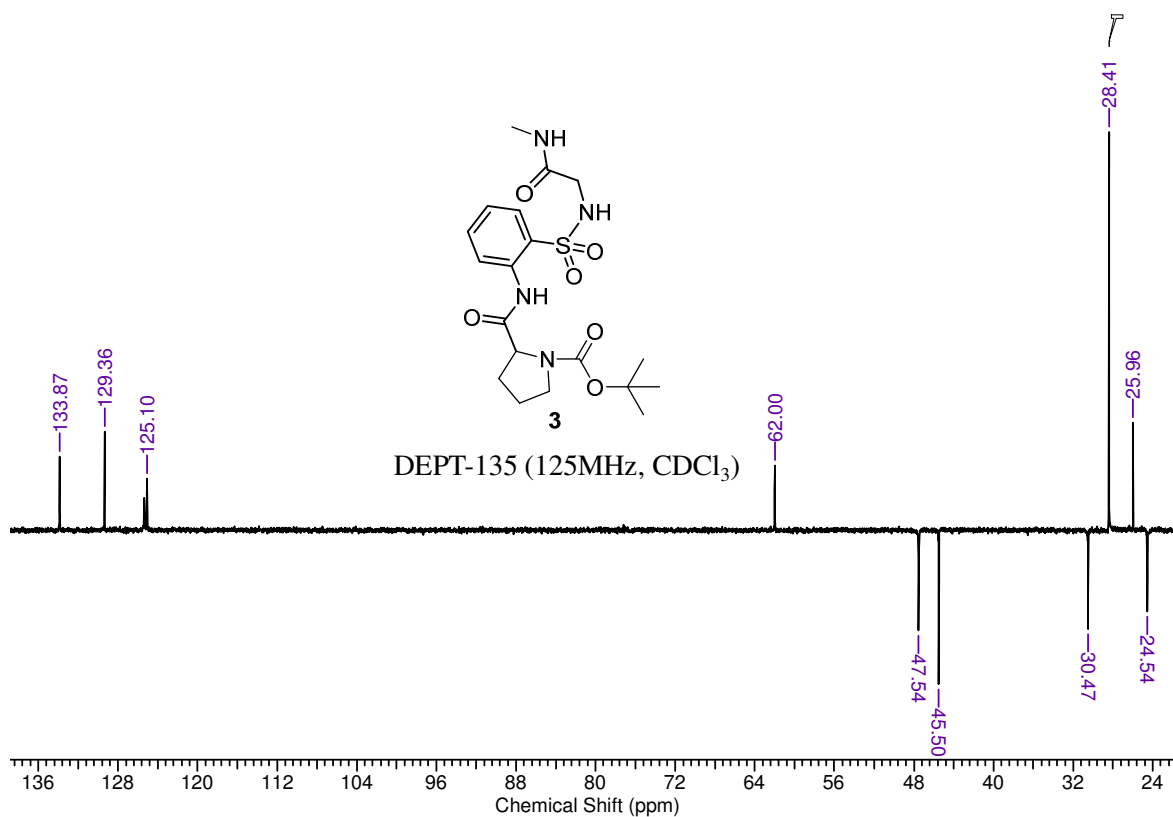

*Note:* The stereochemistry of prolines in **3** is 'S'

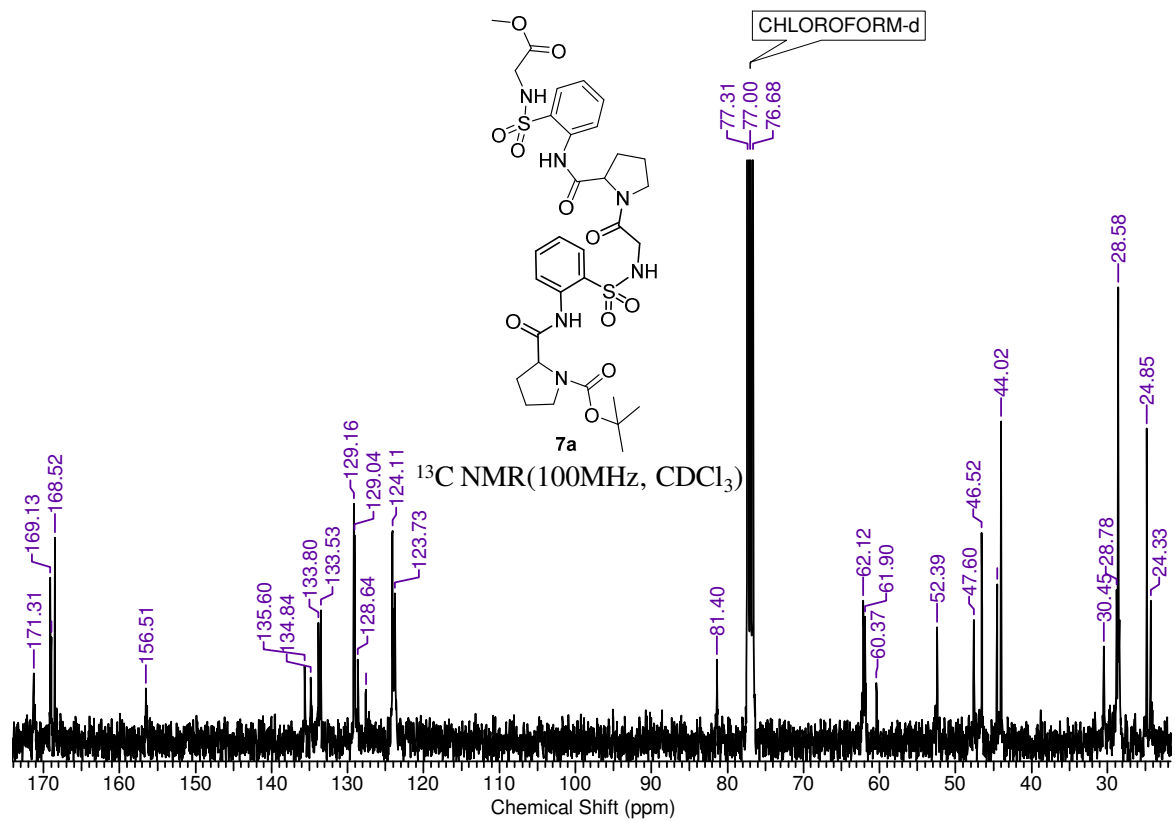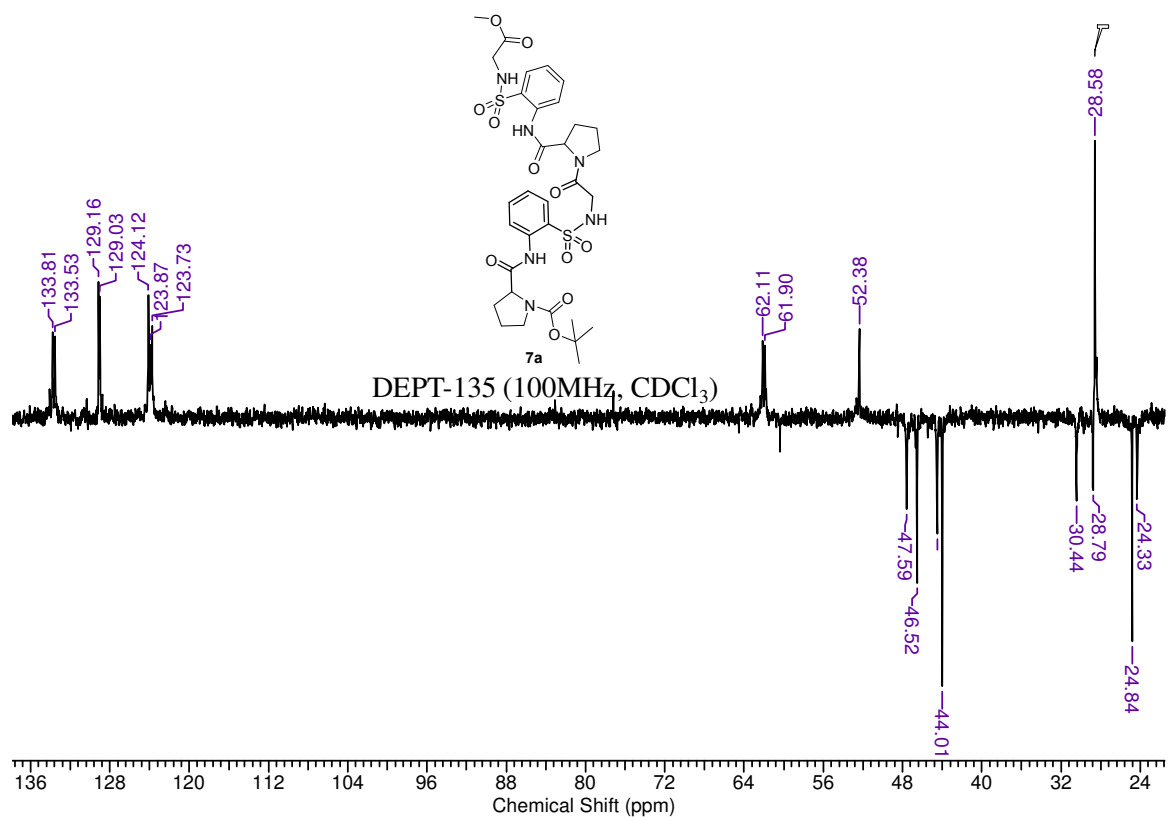

Note: The stereochemistry of prolines in **7a** is 'S'

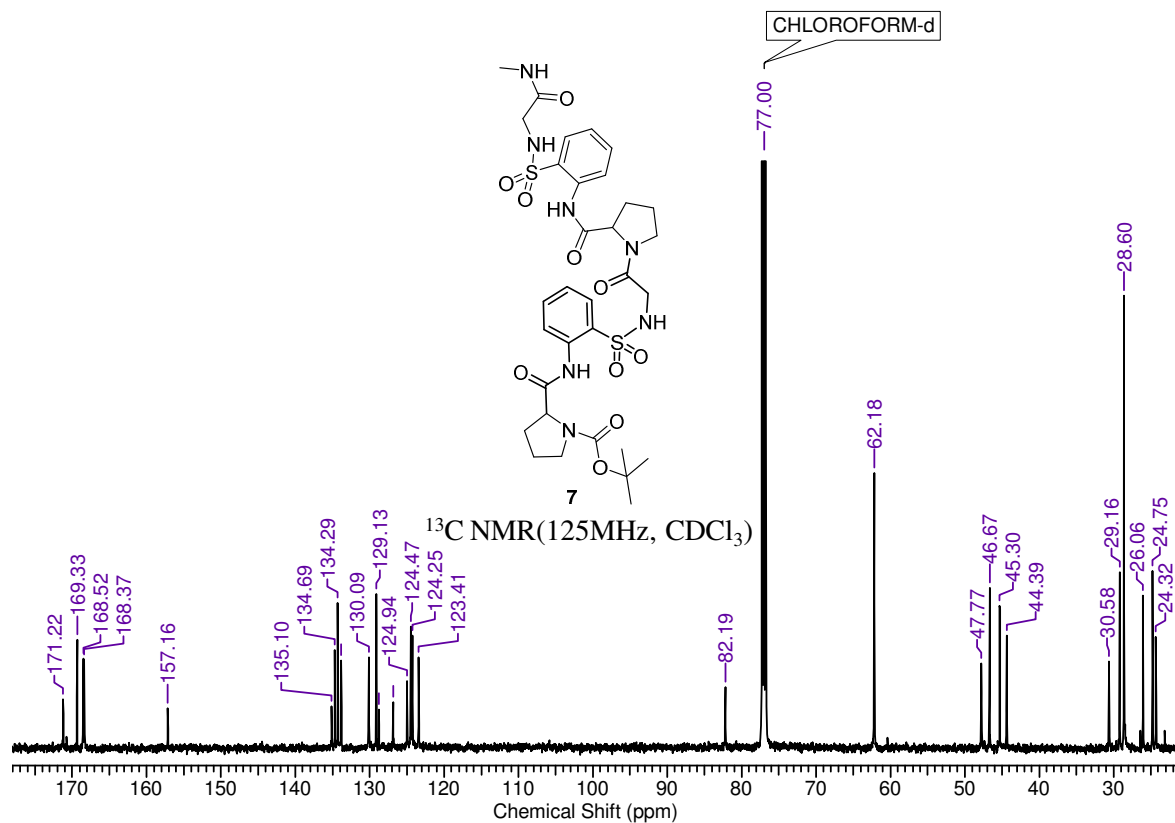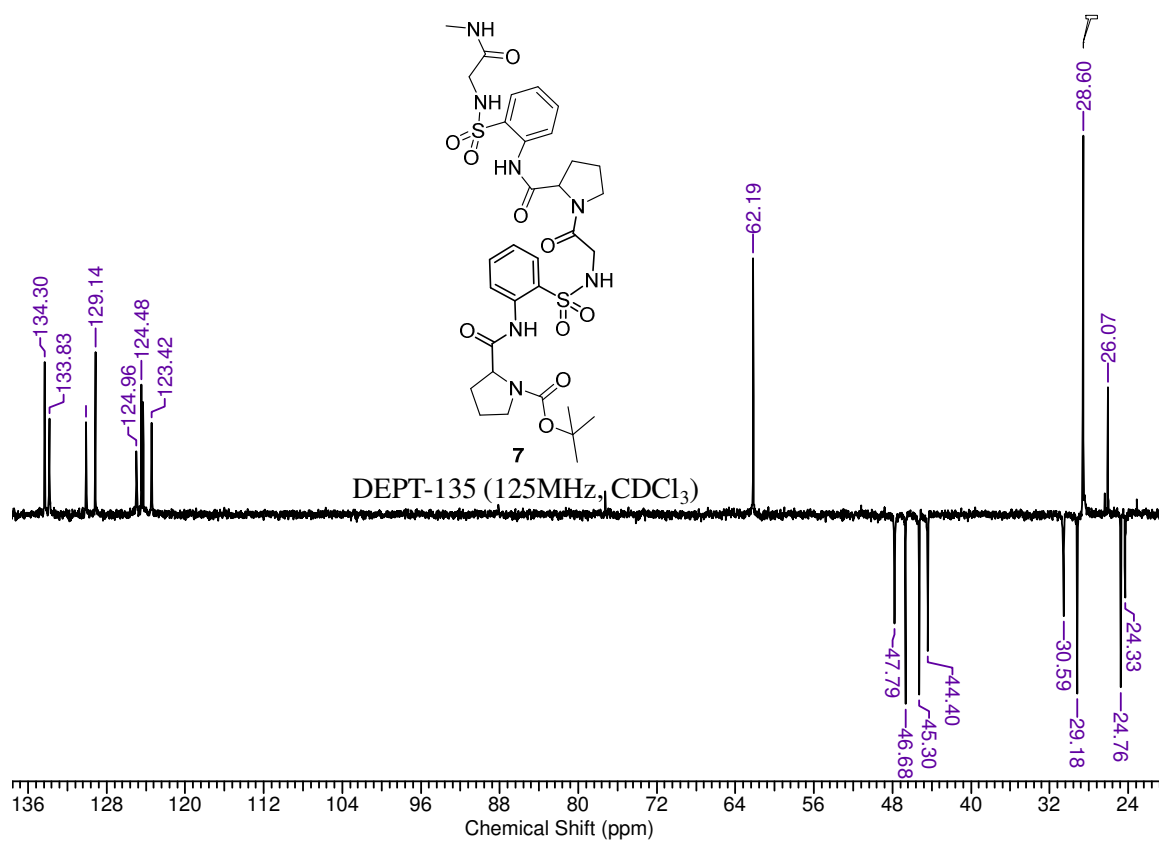

Note: The stereochemistry of prolines in **7** is 'S'

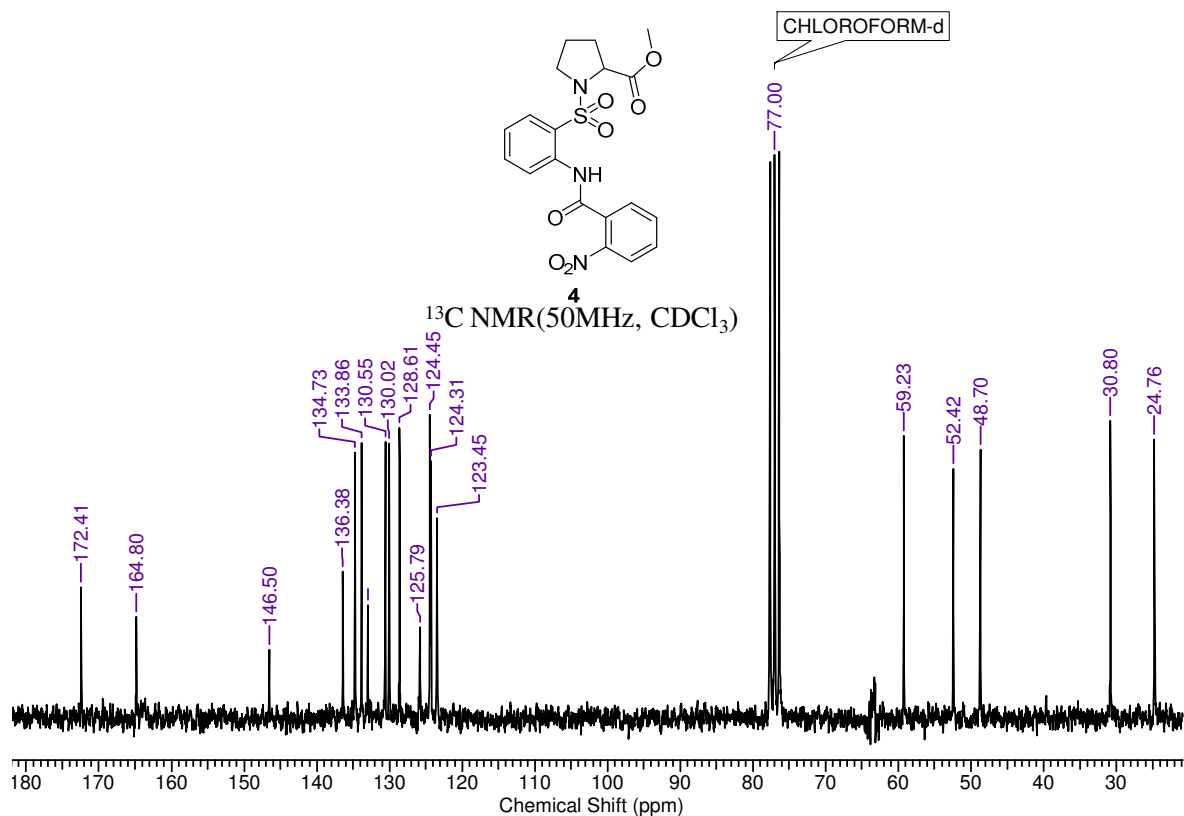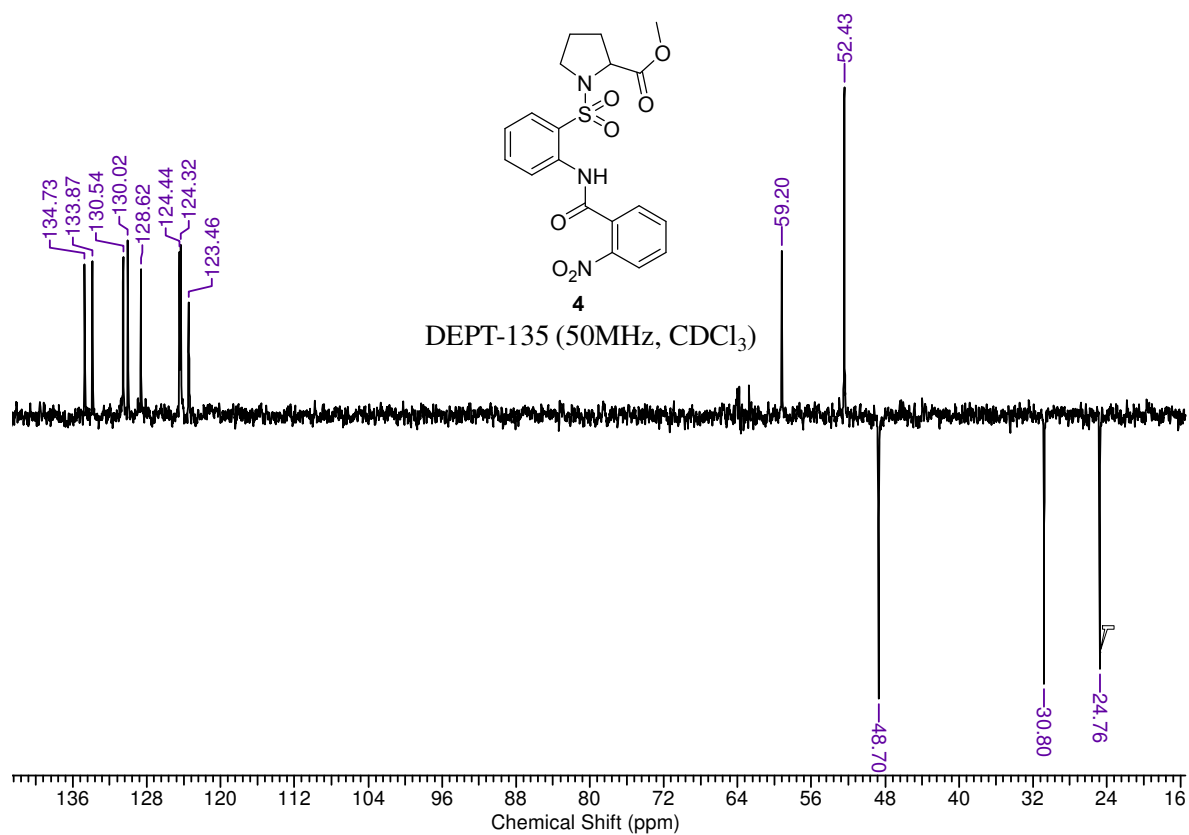

Note: The stereochemistry of prolines in **4** is 'S'

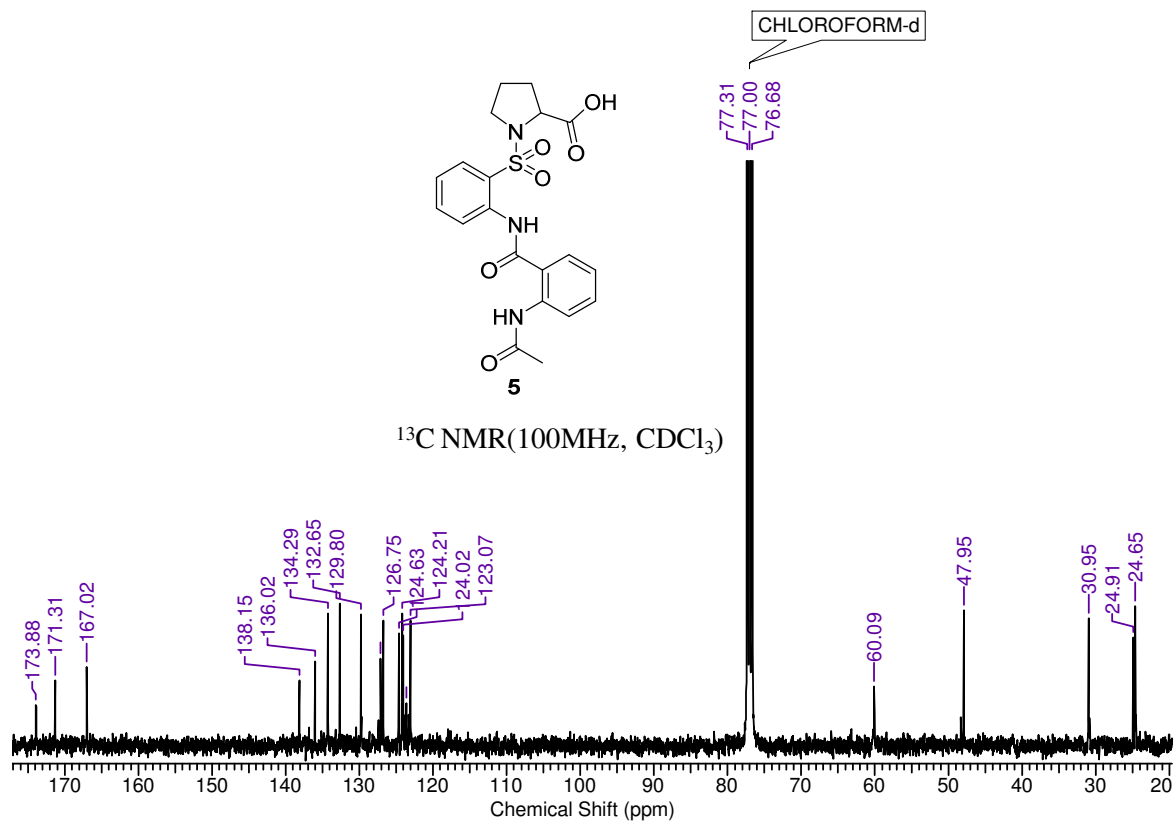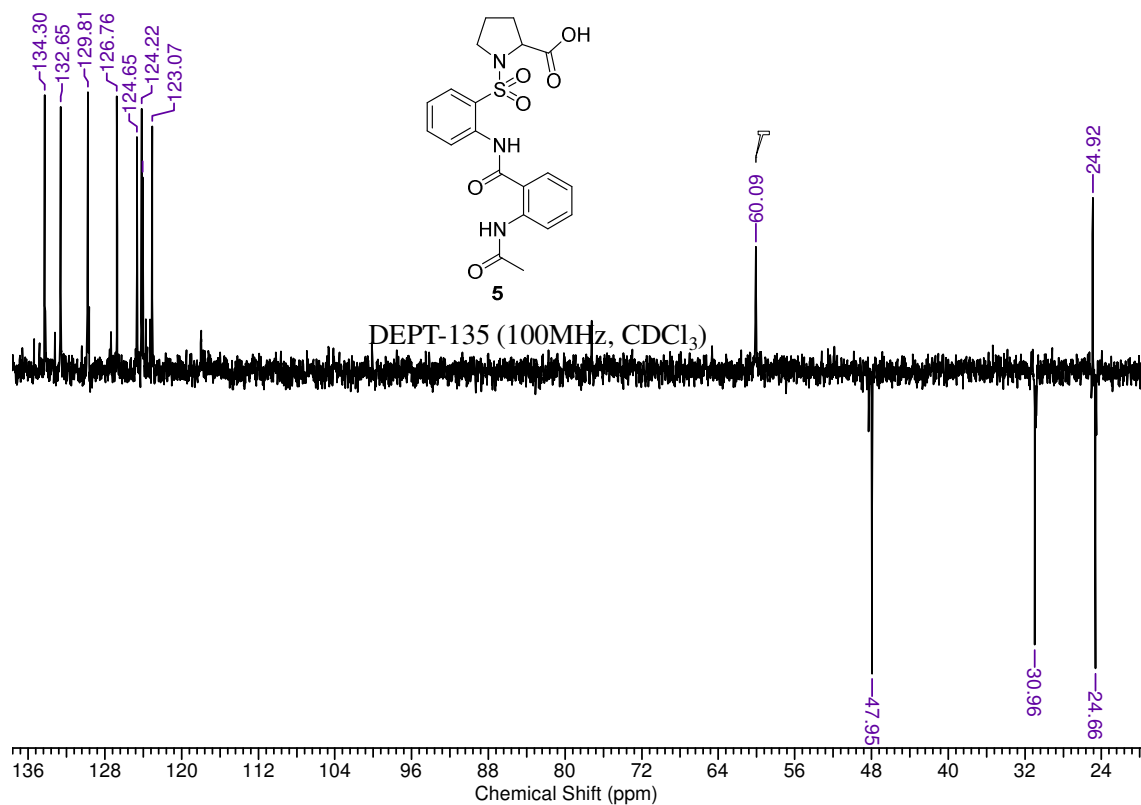

Note: The stereochemistry of prolines in **5** is 'S'



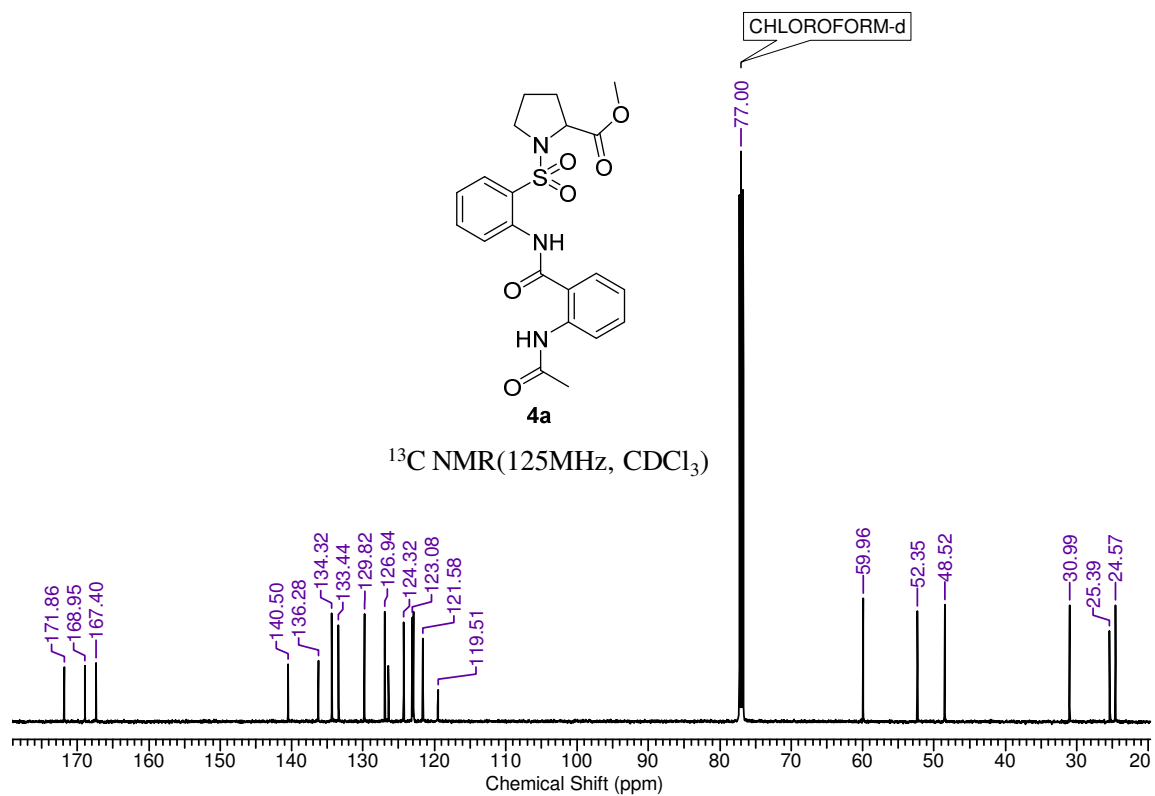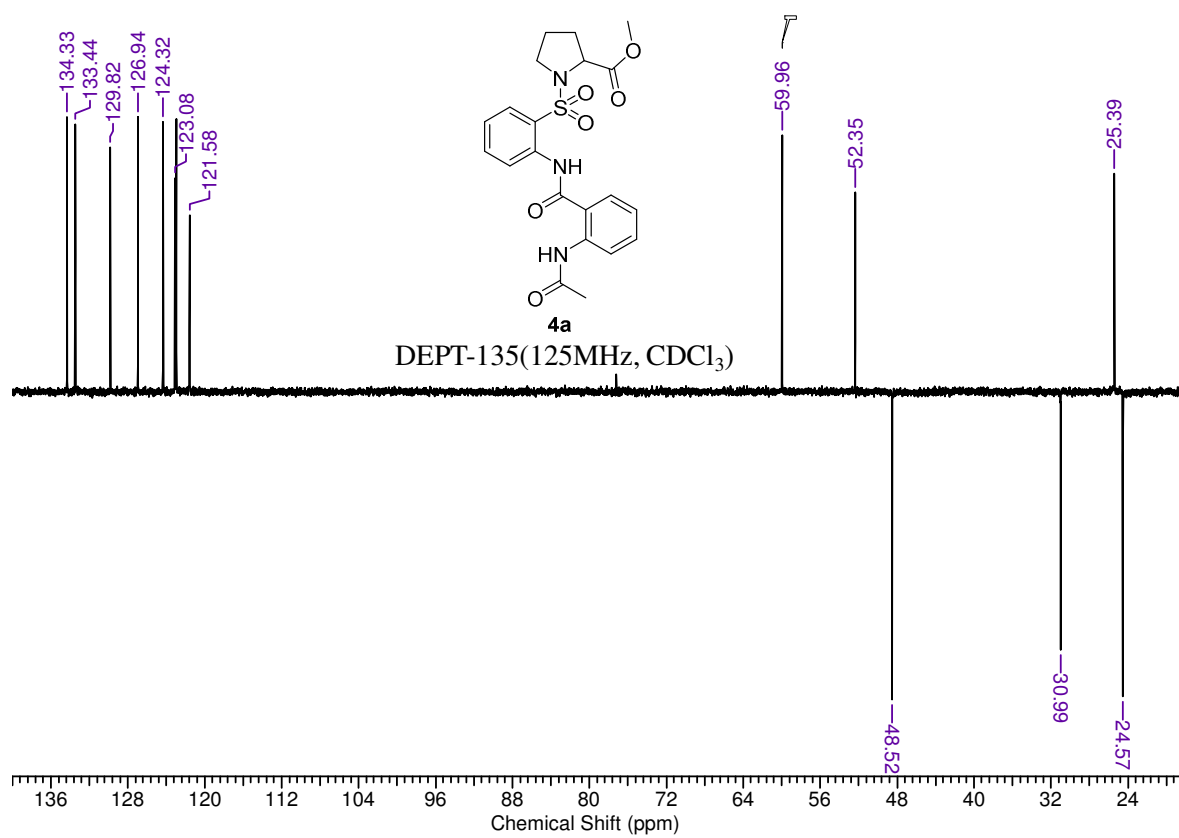

Note: The stereochemistry of prolines in **4a** is 'S'

**Table S1. Titration study of 1 in CDCl<sub>3</sub> (20 mmol) with DMSO-*d*<sub>6</sub> (volume of DMSO-*d*<sub>6</sub> added at each addition = 5 μl)**

| Volume of DMSO- <i>d</i> <sub>6</sub> added (in μL) | Chemical Shift (in ppm) |      |      |
|-----------------------------------------------------|-------------------------|------|------|
|                                                     | δNH1                    | δNH2 | δNH3 |
| 0                                                   | 4.95                    | 9.64 | 6.93 |
| 5                                                   | 5.1                     | 9.63 | 6.94 |
| 10                                                  | 5.22                    | 9.61 | 6.96 |
| 15                                                  | 5.35                    | 9.59 | 6.98 |
| 20                                                  | 5.52                    | 9.56 | 7    |
| 25                                                  | 5.61                    | 9.55 | 7.01 |
| 30                                                  | 5.69                    | 9.53 | 7.01 |
| 35                                                  | 5.76                    | 9.51 | 7.02 |
| 40                                                  | 5.81                    | 9.51 | 7.02 |
| 45                                                  | 5.87                    | 9.49 | 7.01 |
| 50                                                  | 5.93                    | 9.47 | 6.98 |

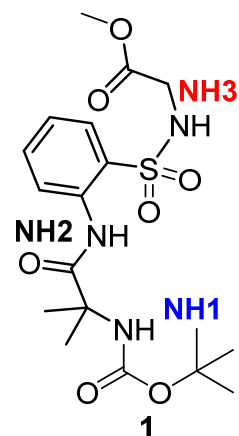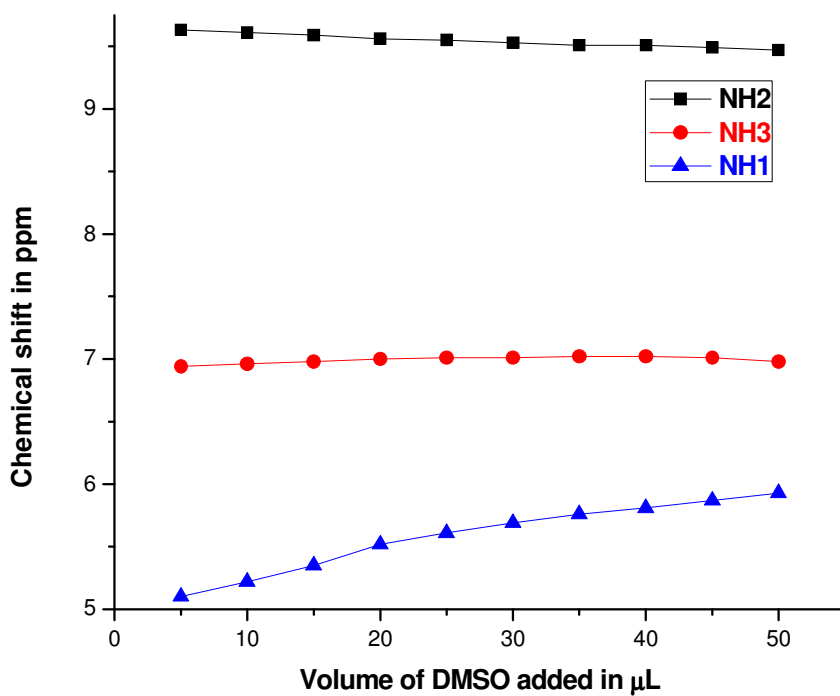

**Table S2. Titration study of 2 in CDCl<sub>3</sub> (20 mmol) with DMSO-*d*<sub>6</sub> (volume of DMSO-*d*<sub>6</sub> added at each addition = 5 μl)**

| Volume of DMSO- <i>d</i> <sub>6</sub> added (in μL) | Chemical Shift (in ppm) |      |      |      |
|-----------------------------------------------------|-------------------------|------|------|------|
|                                                     | δNH1                    | δNH2 | δNH3 | δNH4 |
| 0                                                   | 5.06                    | 9.35 | 7.04 | 6.41 |
| 5                                                   | 5.21                    | 9.35 | 7.04 | 6.41 |
| 10                                                  | 5.41                    | 9.34 | 7.06 | 6.42 |
| 15                                                  | 5.52                    | 9.33 | 7.06 | 6.43 |
| 20                                                  | 5.64                    | 9.33 | 7.07 | 6.44 |
| 25                                                  | 5.7                     | 9.32 | 7.07 | 6.44 |
| 30                                                  | 5.77                    | 9.31 | 7.08 | 6.44 |
| 35                                                  | 5.83                    | 9.31 | 7.08 | 6.45 |
| 40                                                  | 5.92                    | 9.3  | 7.08 | 6.46 |
| 45                                                  | 5.96                    | 9.3  | 7.08 | 6.46 |
| 50                                                  | 6.02                    | 9.3  | 7.08 | 6.47 |

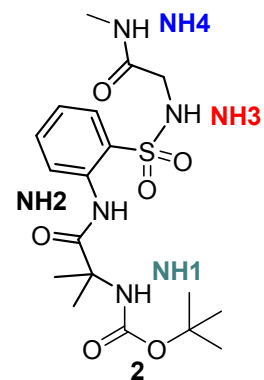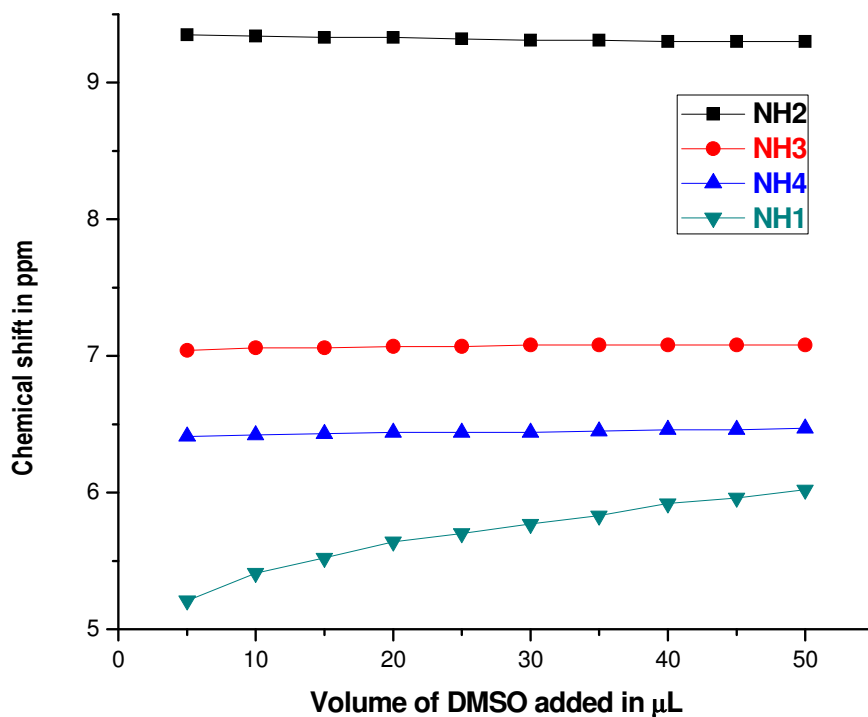

**Table S3. Titration study of 6 in CDCl<sub>3</sub> (20 mmol) with DMSO-*d*<sub>6</sub> (volume of DMSO-*d*<sub>6</sub> added at each addition = 5 μl)**

| Volume of DMSO- <i>d</i> <sub>6</sub> added in μL | Chemical Shift in ppm |      |      |      |      |      |      |
|---------------------------------------------------|-----------------------|------|------|------|------|------|------|
|                                                   | δNH1                  | δNH2 | δNH3 | δNH4 | δNH5 | δNH6 | δNH7 |
| 0                                                 | 5.04                  | 9.39 | 7.24 | 7.06 | 9.18 | 6.86 | 6.45 |
| 5                                                 | 5.18                  | 9.41 | 7.25 | 7.13 | 9.18 | 6.86 | 6.48 |
| 10                                                | 5.65                  | 9.49 | 7.37 | 7.17 | 9.18 | 6.87 | 6.65 |
| 15                                                | 5.77                  | 9.5  | 7.43 | 7.19 | 9.18 | 6.87 | 6.69 |
| 20                                                | 5.81                  | 9.5  | 7.47 | 7.19 | 9.17 | 6.87 | 6.72 |
| 25                                                | 5.96                  | 9.51 | 7.53 | 7.2  | 9.16 | 6.86 | 6.75 |
| 30                                                | 5.98                  | 9.51 | 7.56 | 7.18 | 9.16 | 6.86 | 6.77 |
| 35                                                | 6.05                  | 9.52 | 7.58 | 7.17 | 9.15 | 6.85 | 6.78 |
| 40                                                | 6.07                  | 9.51 | 7.63 | 7.17 | 9.14 | 6.84 | 6.8  |
| 45                                                | 6.11                  | 9.51 | 7.69 | 7.15 | 9.14 | 6.84 | 6.84 |

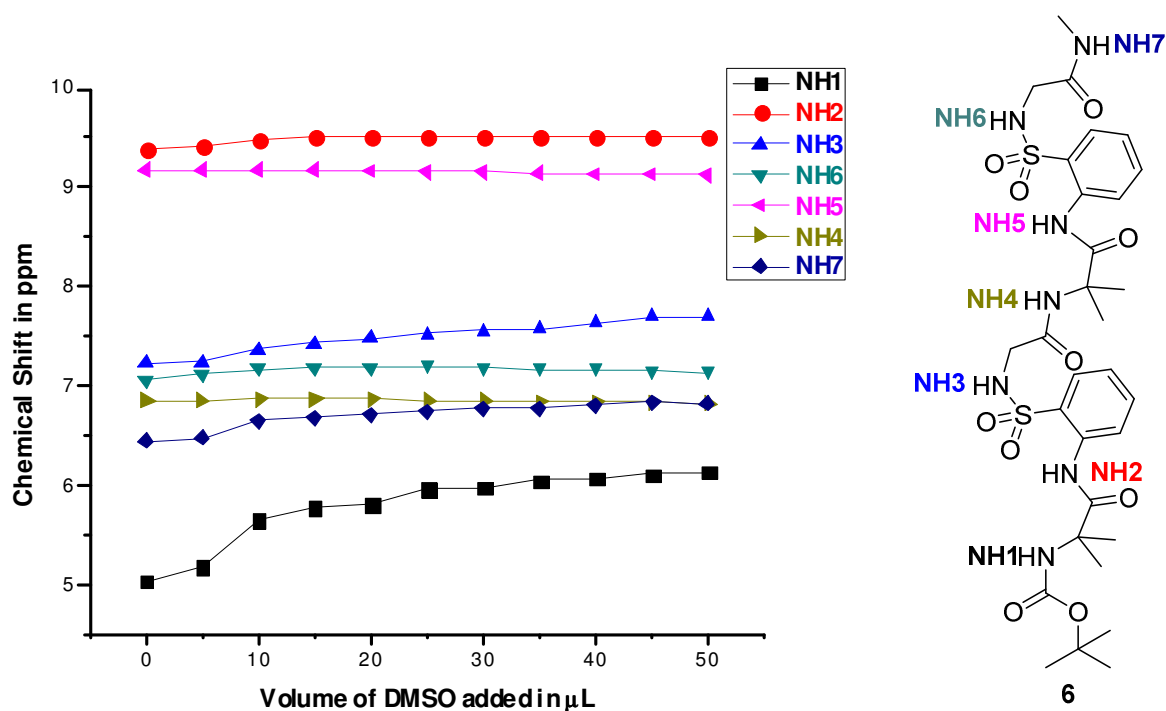

**Table S4.** Titration study of **3** in  $\text{CDCl}_3$  (20 mmol) with  $\text{DMSO-}d_6$  (volume of  $\text{DMSO-}d_6$  added at each addition = 5  $\mu\text{L}$ )

| Volume of $\text{DMSO-}d_6$ added (in $\mu\text{L}$ ) | Chemical Shift (in ppm) |                    |                    |
|-------------------------------------------------------|-------------------------|--------------------|--------------------|
|                                                       | $\delta\text{NH1}$      | $\delta\text{NH2}$ | $\delta\text{NH3}$ |
| 5                                                     | 9.26                    | 7.17               | 6.5                |
| 10                                                    | 9.26                    | 7.17               | 6.51               |
| 15                                                    | 9.26                    | 7.17               | 6.51               |
| 20                                                    | 9.27                    | 7.17               | 6.51               |
| 25                                                    | 9.27                    | 7.18               | 6.52               |
| 30                                                    | 9.27                    | 7.18               | 6.53               |
| 35                                                    | 9.28                    | 7.18               | 6.54               |
| 40                                                    | 9.28                    | 7.18               | 6.54               |
| 45                                                    | 9.28                    | 7.18               | 6.55               |
| 50                                                    | 9.29                    | 7.19               | 6.56               |

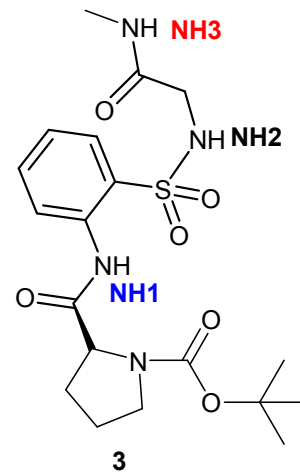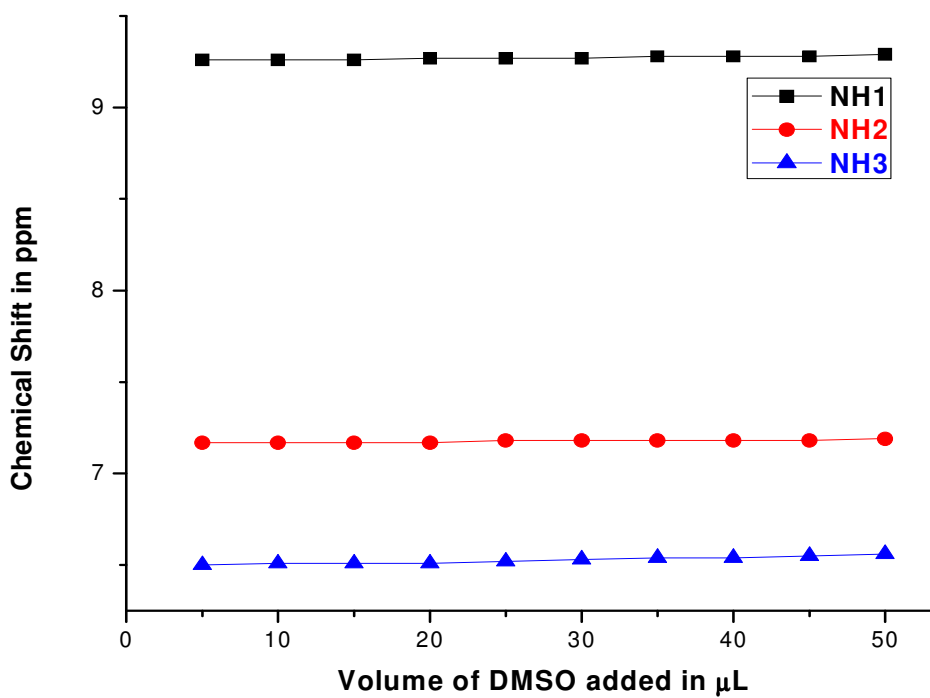

**Table S5.** Titration study of **7** in  $\text{CDCl}_3$  (20 mmol) with  $\text{DMSO-}d_6$  (volume of  $\text{DMSO-}d_6$  added at each addition = 5  $\mu\text{L}$ )

| Volume of $\text{DMSO-}d_6$ added (in $\mu\text{L}$ ) | Chemical Shift (in ppm) |                    |                    |                    |                    |
|-------------------------------------------------------|-------------------------|--------------------|--------------------|--------------------|--------------------|
|                                                       | $\delta\text{NH1}$      | $\delta\text{NH2}$ | $\delta\text{NH3}$ | $\delta\text{NH4}$ | $\delta\text{NH5}$ |
| 5                                                     | 9.45                    | 7.01               | 9.41               | 6.72               | 7.01               |
| 10                                                    | 9.46                    | 7.01               | 9.41               | 6.74               | 7.01               |
| 15                                                    | 9.46                    | 7.01               | 9.4                | 6.75               | 7.01               |
| 20                                                    | 9.46                    | 6.99               | 9.39               | 6.75               | 6.99               |
| 25                                                    | 9.46                    | 6.98               | 9.38               | 6.77               | 6.98               |
| 30                                                    | 9.46                    | 6.98               | 9.37               | 6.77               | 6.98               |
| 35                                                    | 9.46                    | 6.97               | 9.36               | 6.79               | 6.97               |
| 40                                                    | 9.46                    | 6.97               | 9.36               | 6.78               | 6.97               |
| 45                                                    | 9.46                    | 6.96               | 9.35               | 6.79               | 6.96               |
| 50                                                    | 9.46                    | 6.96               | 9.34               | 6.8                | 6.96               |

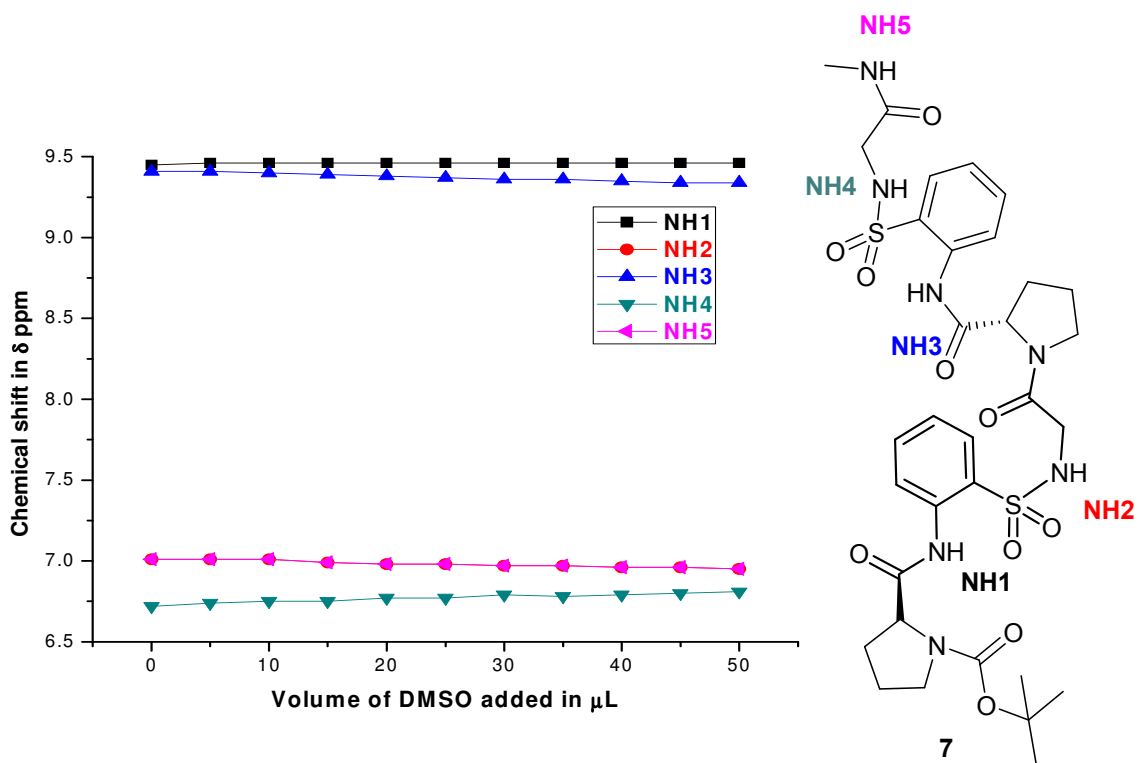

**Table S6.** Titration study of **5** in  $\text{CDCl}_3$  (20 mmol) with  $\text{DMSO-}d_6$  (volume of  $\text{DMSO-}d_6$  added at each addition = 5  $\mu\text{L}$ )

| Volume of $\text{DMSO-}d_6$ added (in $\mu\text{L}$ ) | Chemical Shift (in ppm) |                    |
|-------------------------------------------------------|-------------------------|--------------------|
|                                                       | $\delta\text{NH1}$      | $\delta\text{NH2}$ |
| 5                                                     | 10.9                    | 10.42              |
| 10                                                    | 10.94                   | 10.44              |
| 15                                                    | 10.96                   | 10.44              |
| 20                                                    | 10.97                   | 10.43              |
| 25                                                    | 10.97                   | 10.42              |
| 30                                                    | 10.96                   | 10.41              |
| 35                                                    | 10.95                   | 10.4               |
| 40                                                    | 10.94                   | 10.38              |
| 45                                                    | 10.92                   | 10.36              |
| 50                                                    | 10.91                   | 10.35              |

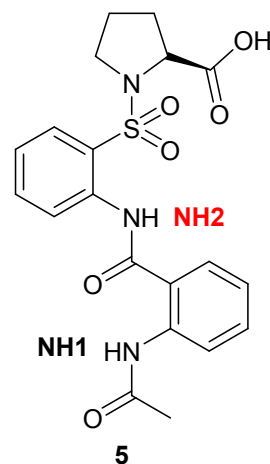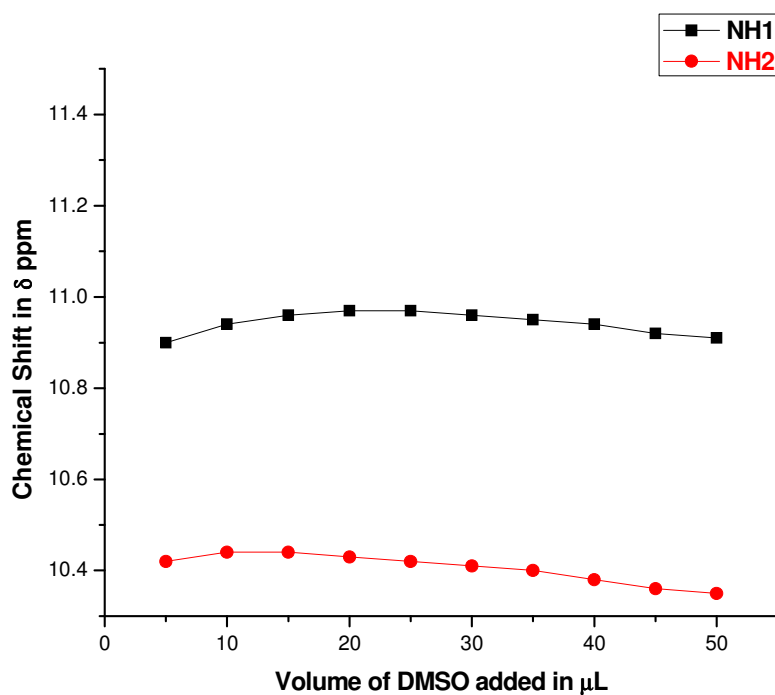

Table S7. Variable temperature study of **1** (20 mmol, 400 MHz, CDCl<sub>3</sub>).

| Temperature (in °K) | Chemical shift in ppm |      |      |
|---------------------|-----------------------|------|------|
|                     | δNH1                  | δNH2 | δNH3 |
| 268                 | 5.06                  | 9.64 | 7.01 |
| 273                 | 4.99                  | 9.64 | 7    |
| 278                 | 4.97                  | 9.64 | 6.98 |
| 283                 | 4.97                  | 9.64 | 6.97 |
| 288                 | 4.96                  | 9.64 | 6.96 |
| 293                 | 4.95                  | 9.64 | 6.94 |
| 298                 | 4.95                  | 9.64 | 6.92 |
| 303                 | 4.94                  | 9.64 | 6.9  |
| 308                 | 4.94                  | 9.65 | 6.88 |
| 313                 | 4.93                  | 9.65 | 6.85 |
| 318                 | 4.93                  | 9.65 | 6.82 |
| 323                 | 4.92                  | 9.65 | 6.81 |

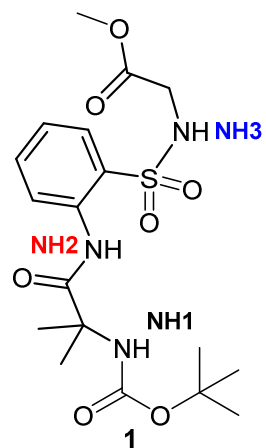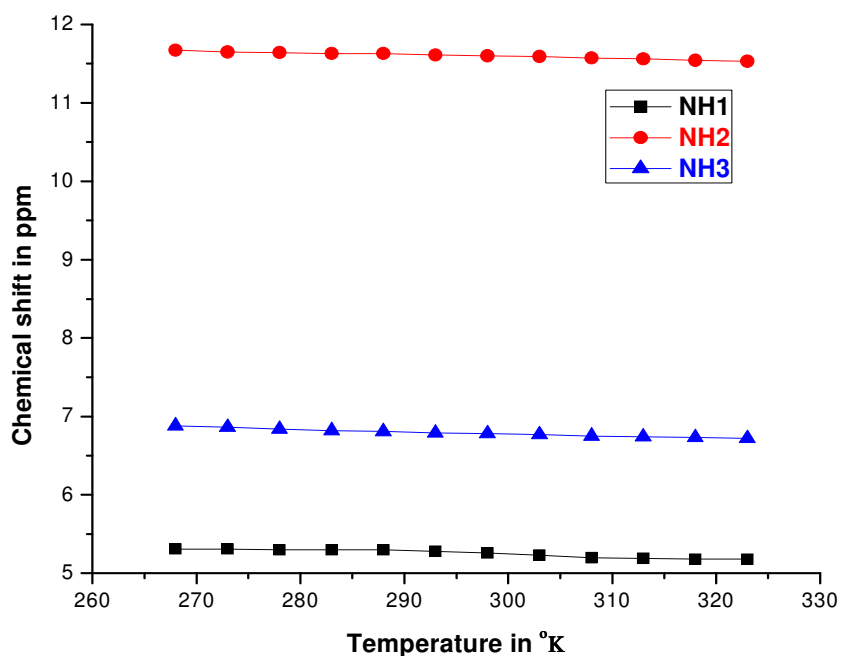



Table S8. Variable temperature study of 2 (20 mmol, 400 MHz, CDCl<sub>3</sub>).

| Temperature<br>(in °K) | Chemical Shift (in ppm) |      |      |      |
|------------------------|-------------------------|------|------|------|
|                        | δNH1                    | δNH2 | δNH3 | δNH4 |
| 268                    | 5.1                     | 9.33 | 7.14 | 6.48 |
| 273                    | 5.09                    | 9.34 | 7.13 | 6.48 |
| 278                    | 5.09                    | 9.34 | 7.11 | 6.47 |
| 283                    | 5.08                    | 9.34 | 7.09 | 6.45 |
| 288                    | 5.07                    | 9.35 | 7.07 | 6.43 |
| 293                    | 5.06                    | 9.35 | 7.05 | 6.42 |
| 293                    | 5.06                    | 9.35 | 7.03 | 6.4  |
| 303                    | 5.05                    | 9.36 | 7    | 6.39 |
| 308                    | 5.04                    | 9.36 | 6.99 | 6.38 |
| 313                    | 5.03                    | 9.37 | 6.96 | 6.36 |
| 318                    | 5.03                    | 9.37 | 6.95 | 6.35 |
| 323                    | 5.02                    | 9.38 | 6.92 | 6.34 |

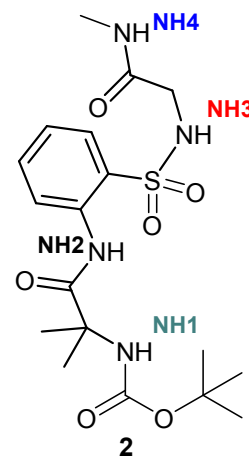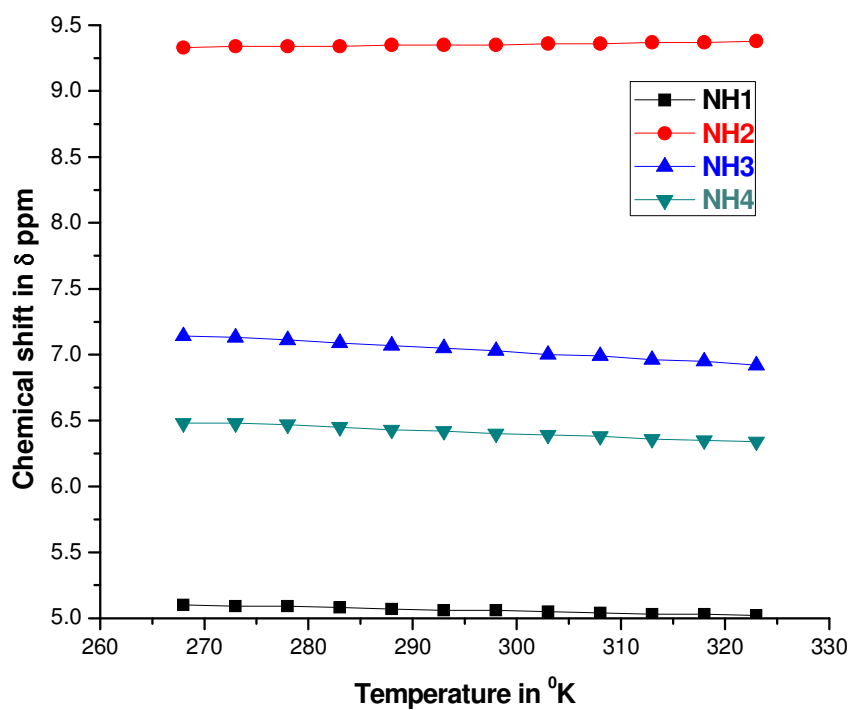

Table S9. Variable temperature study of 6 (10 mmol, 400 MHz, CDCl<sub>3</sub>).

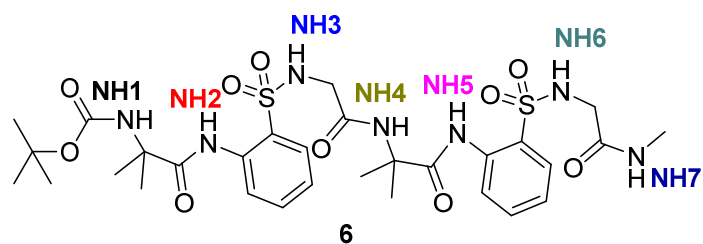

| Temperature<br>(in °K) | Chemical Shift in ppm |              |              |              |              |              |              |
|------------------------|-----------------------|--------------|--------------|--------------|--------------|--------------|--------------|
|                        | $\delta$ NH1          | $\delta$ NH2 | $\delta$ NH3 | $\delta$ NH4 | $\delta$ NH5 | $\delta$ NH6 | $\delta$ NH7 |
| 268                    | 5.11                  | 9.4          | 7.27         | 7.13         | 9.2          | 6.92         | 6.62         |
| 273                    | 5.1                   | 9.4          | 7.27         | 7.13         | 9.19         | 6.91         | 6.6          |
| 278                    | 5.1                   | 9.4          | 7.26         | 7.12         | 9.19         | 6.9          | 6.58         |
| 283                    | 5.09                  | 9.4          | 7.26         | 7.11         | 9.19         | 6.89         | 6.56         |
| 288                    | 5.09                  | 9.4          | 7.26         | 7.1          | 9.19         | 6.88         | 6.53         |
| 293                    | 5.08                  | 9.4          | 7.26         | 7.09         | 9.18         | 6.86         | 6.5          |
| 298                    | 5.08                  | 9.4          | 7.25         | 7.08         | 9.18         | 6.85         | 6.48         |
| 303                    | 5.07                  | 9.4          | 7.21         | 7.08         | 9.18         | 6.83         | 6.46         |
| 308                    | 5.07                  | 9.4          | 7.19         | 7.06         | 9.18         | 6.82         | 6.43         |
| 313                    | 5.06                  | 9.4          | 7.17         | 7.05         | 9.18         | 6.8          | 6.41         |

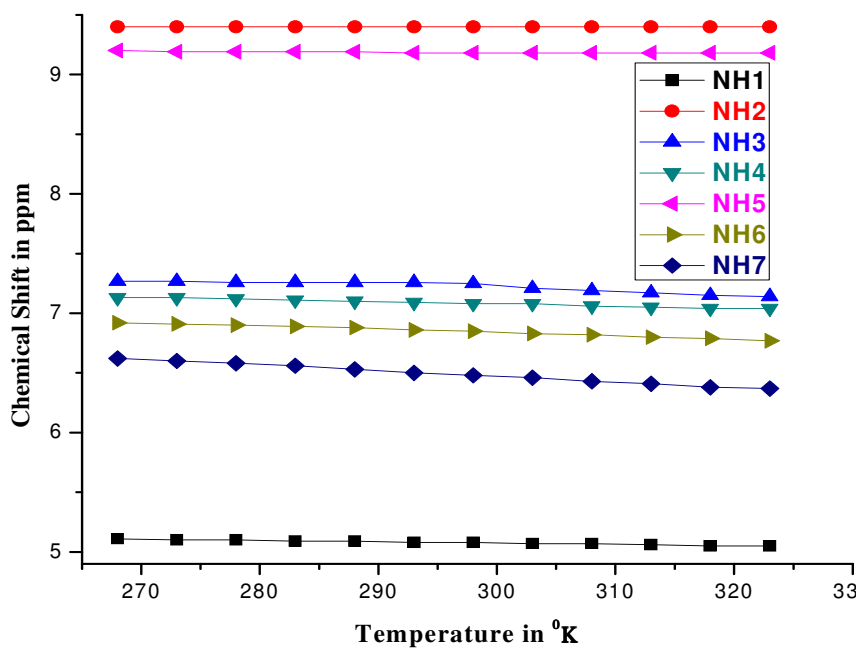

**Table S10. Variable temperature of 3 in CDCl<sub>3</sub> (20 mmol) with DMSO-*d*<sub>6</sub> (volume of DMSO-*d*<sub>6</sub> added at each addition = 5 μl)**

| Temperature (in °K) | Chemical shift in ppm |      |      |
|---------------------|-----------------------|------|------|
|                     | δNH1                  | δNH2 | δNH3 |
| 268                 | 9.26                  | 7.26 | 6.57 |
| 273                 | 9.26                  | 7.24 | 6.56 |
| 278                 | 9.26                  | 7.23 | 6.55 |
| 283                 | 9.26                  | 7.21 | 6.53 |
| 288                 | 9.26                  | 7.21 | 6.52 |
| 293                 | 9.26                  | 7.17 | 6.5  |
| 298                 | 9.26                  | 7.16 | 6.49 |
| 303                 | 9.26                  | 7.13 | 6.47 |
| 308                 | 9.27                  | 7.11 | 6.46 |
| 313                 | 9.27                  | 7.09 | 6.45 |
| 318                 | 9.27                  | 7.06 | 6.43 |
| 323                 | 9.27                  | 7.04 | 6.42 |

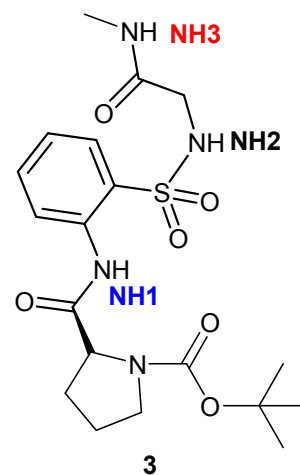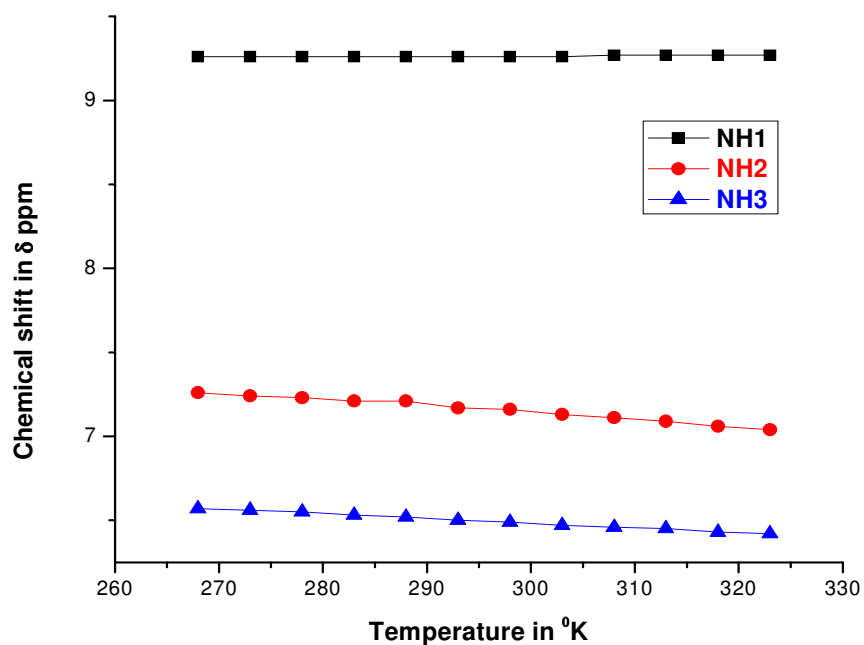

Variable temperature of 7 in CDCl<sub>3</sub> (20 mmol) with DMSO-*d*<sub>6</sub> (volume of DMSO-*d*<sub>6</sub> added at each addition = 5 μl)

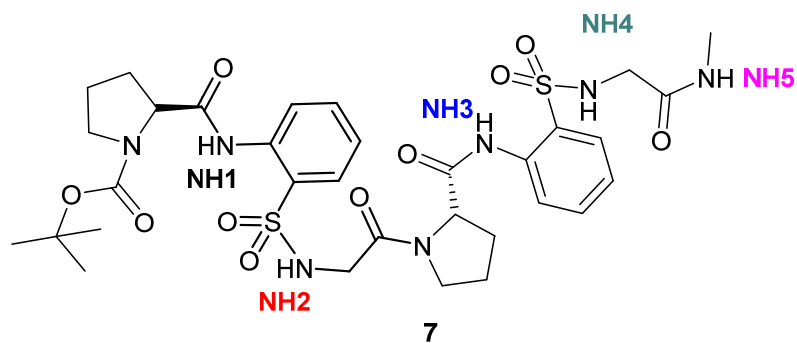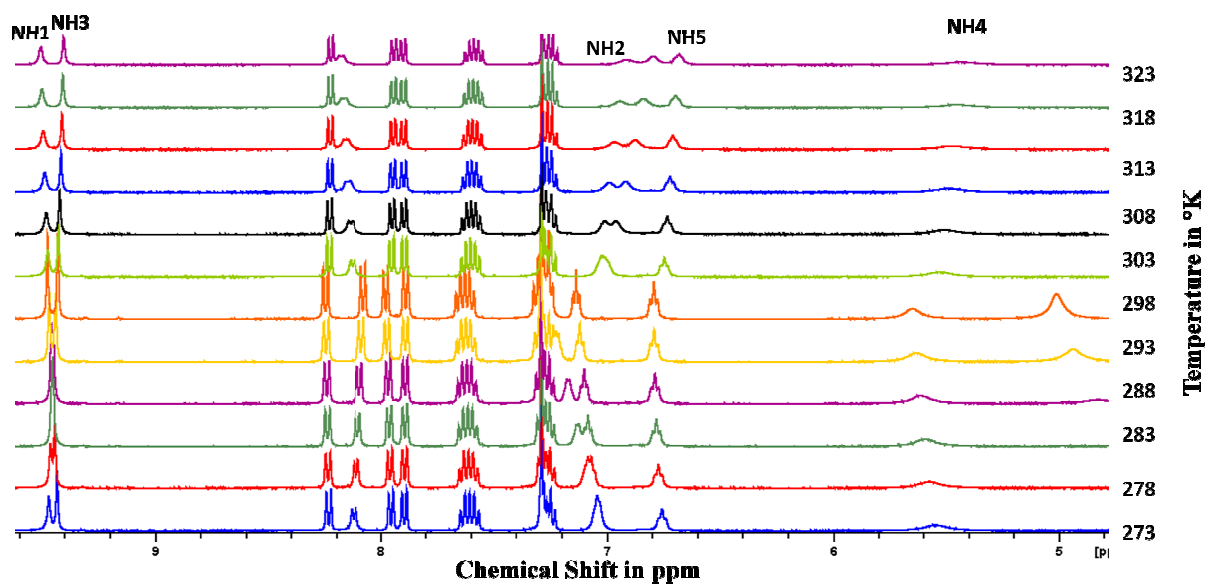

Fig. 3: Stacked plot for variable temperature study of 7.

**Table S11. Variable temperature of 5 in CDCl<sub>3</sub> (20 mmol) with DMSO-*d*<sub>6</sub> (volume of DMSO-*d*<sub>6</sub> added at each addition = 5 μl)**

| Temperature<br>in °K | Chemical Shift<br>(in ppm) |       |
|----------------------|----------------------------|-------|
|                      | δNH1                       | δNH2  |
| 268                  | 10.35                      | 10.22 |
| 273                  | 10.33                      | 10.22 |
| 278                  | 10.33                      | 10.22 |
| 283                  | 10.33                      | 10.22 |
| 288                  | 10.33                      | 10.22 |
| 293                  | 10.33                      | 10.22 |
| 298                  | 10.33                      | 10.22 |
| 303                  | 10.33                      | 10.22 |
| 308                  | 10.33                      | 10.22 |
| 313                  | 10.33                      | 10.22 |
| 318                  | 10.33                      | 10.22 |
| 323                  | 10.33                      | 10.22 |

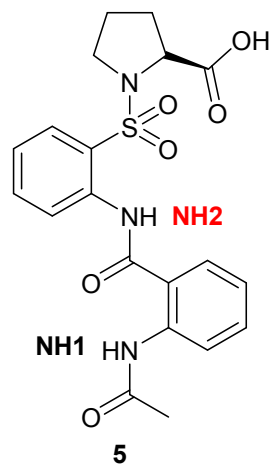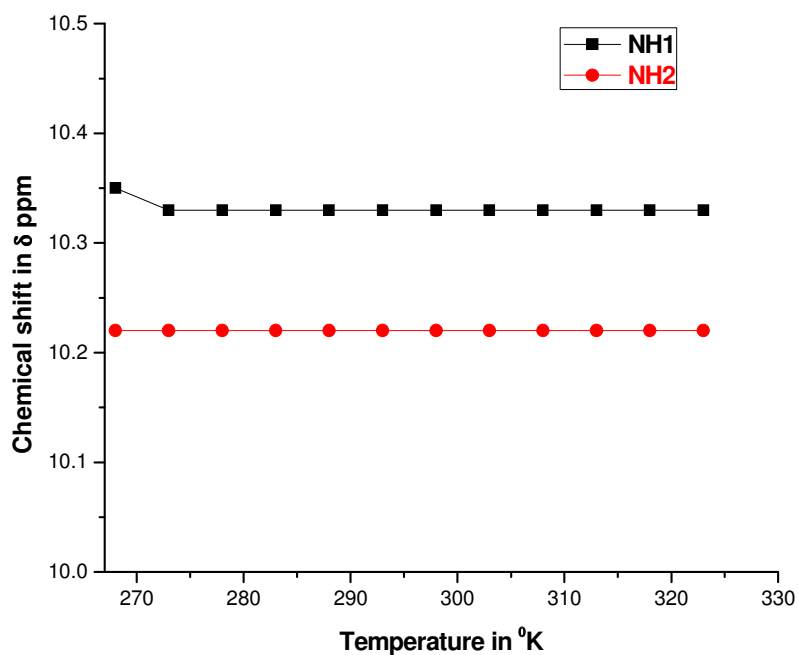

(a)

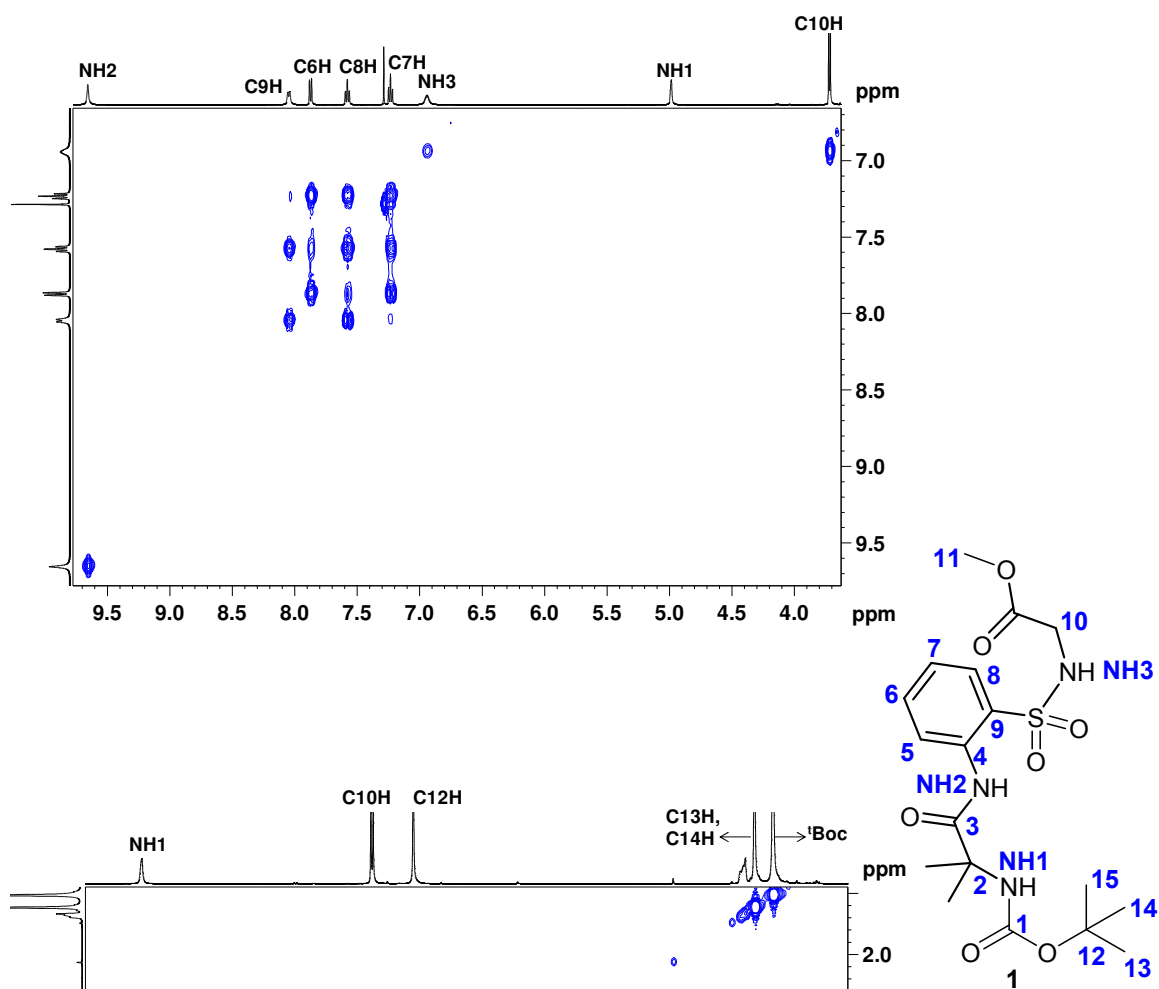

**Fig. 4:** Partial COSY spectra of **1** (400MHz, CDCl<sub>3</sub>): aromatic (a) and aliphatic (b) regions.

(a)

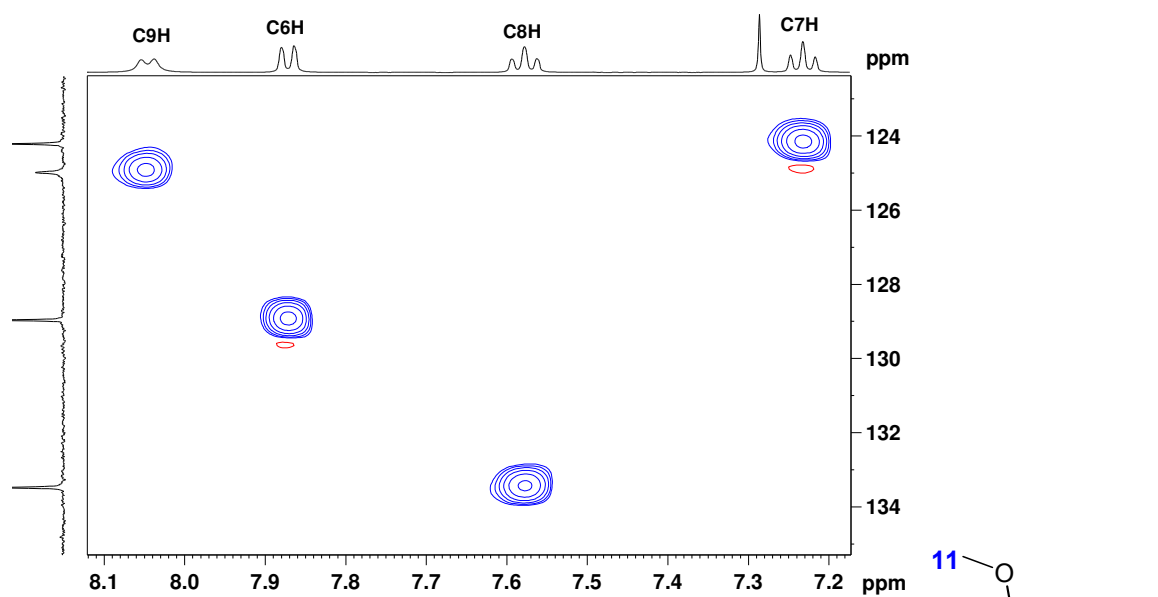

(b)

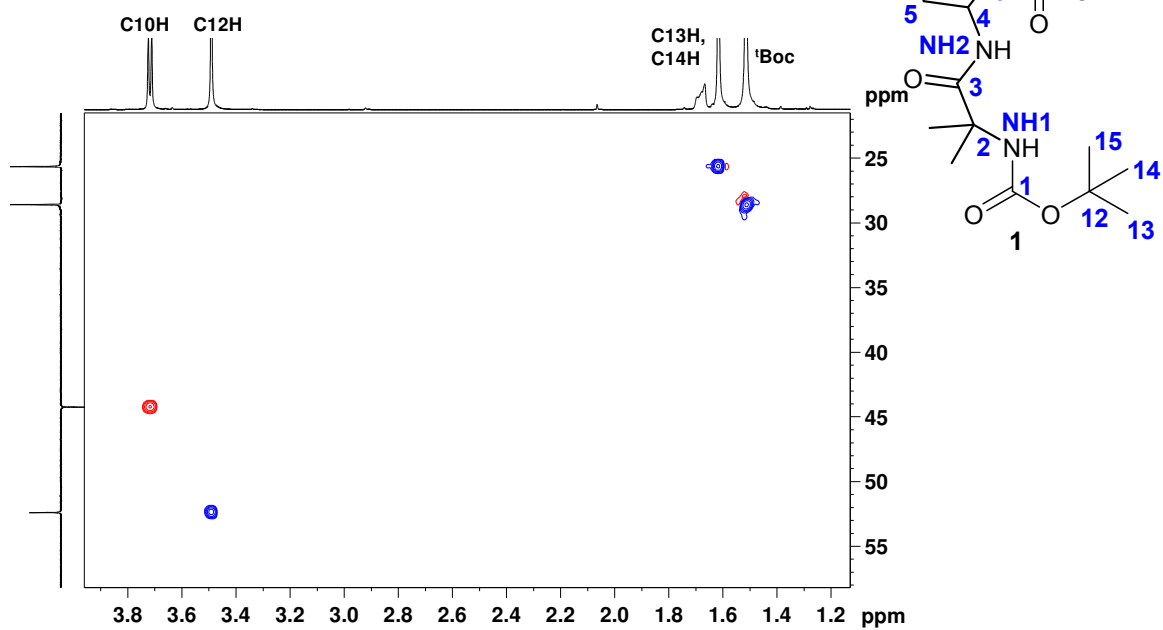

**Fig. 5:** Partial HSQC spectra of **1** (400MHz,  $\text{CDCl}_3$ ): aromatic (a) and aliphatic (b) regions.

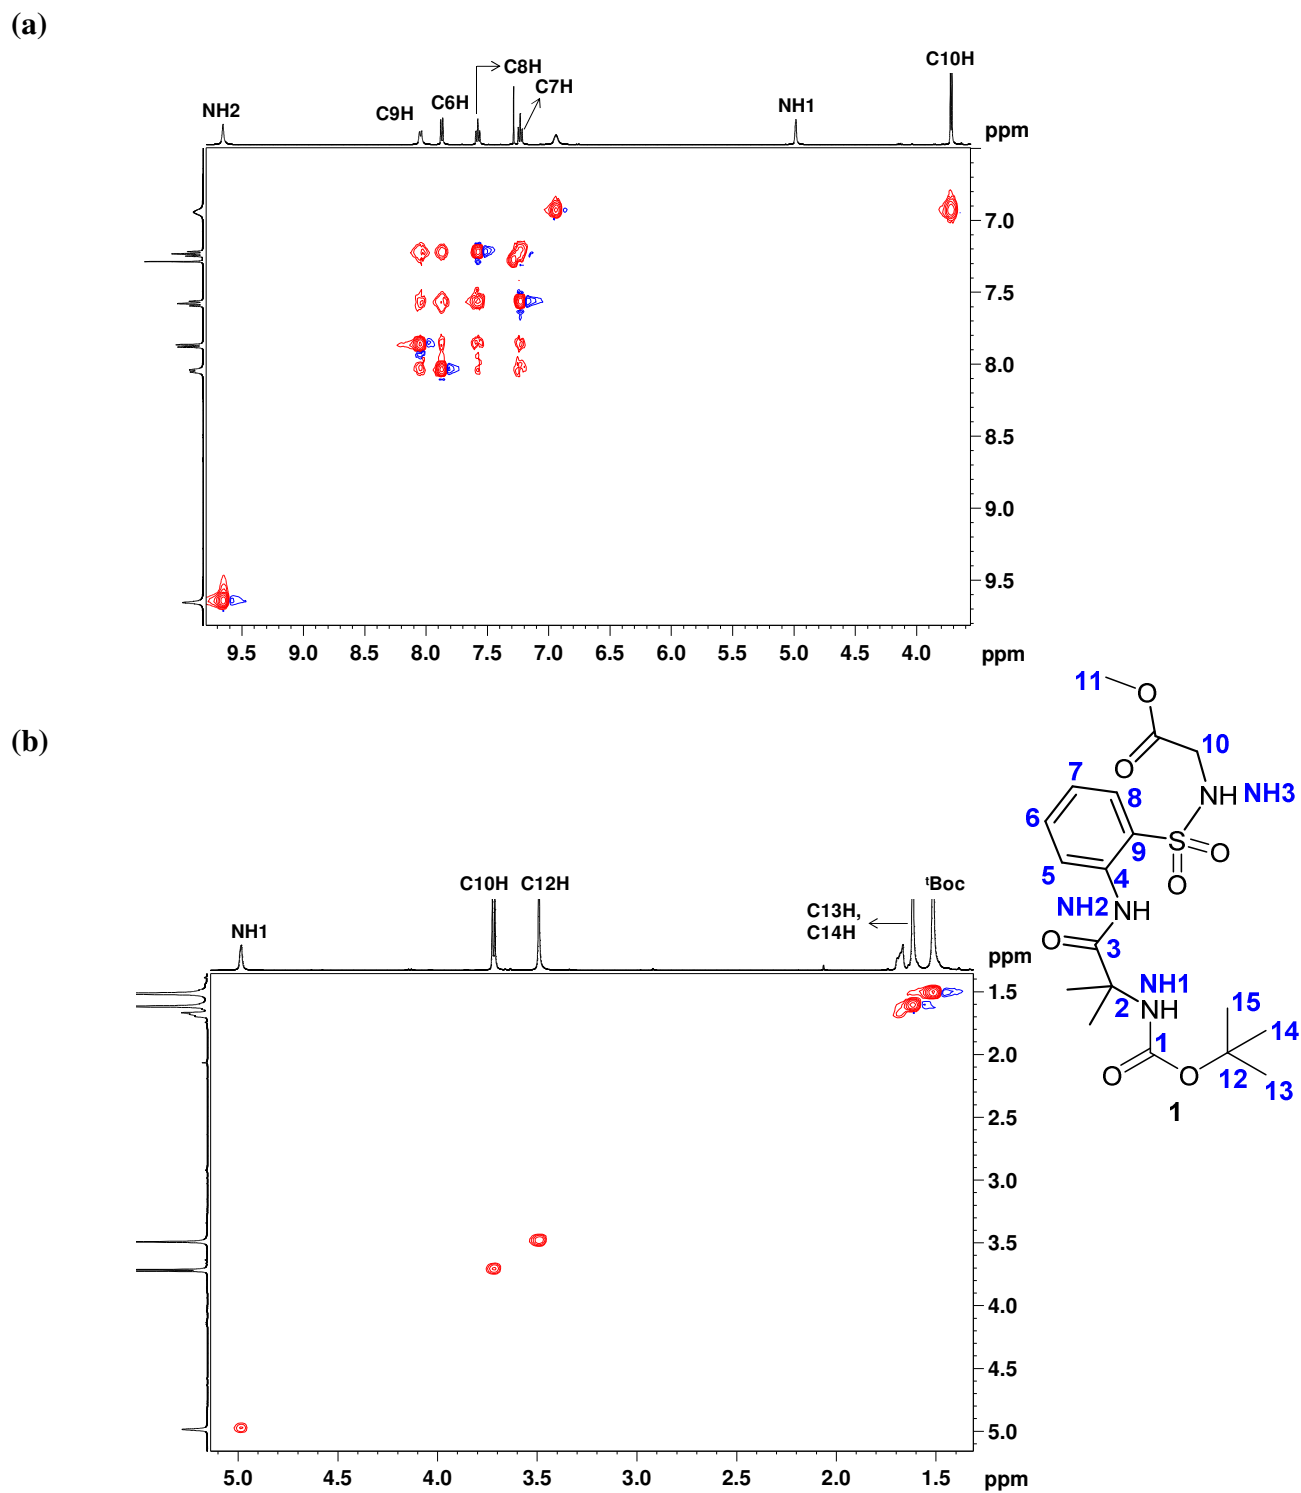

**Fig. 6:** Partial TOCSY spectra of **1** (400MHz, CDCl<sub>3</sub>): aromatic (a) and aliphatic (b) regions.



(a)

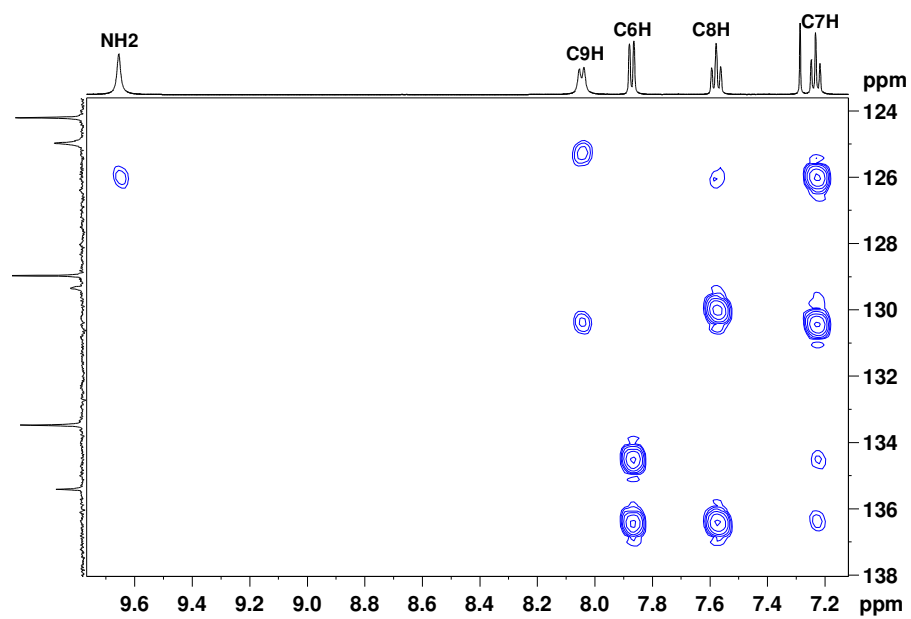

(b)

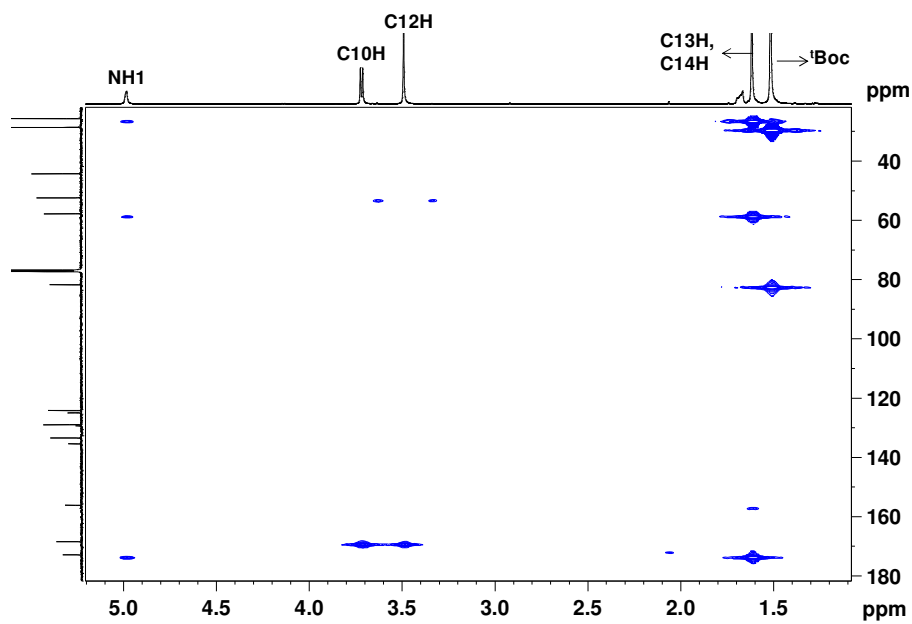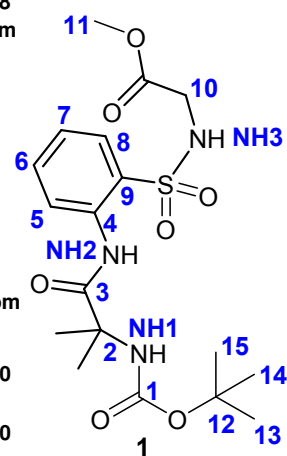

**Fig. 7:** Partial HMBC spectra of **1** (400MHz,  $\text{CDCl}_3$ ): aromatic (a) and aliphatic (b) regions.

(a)

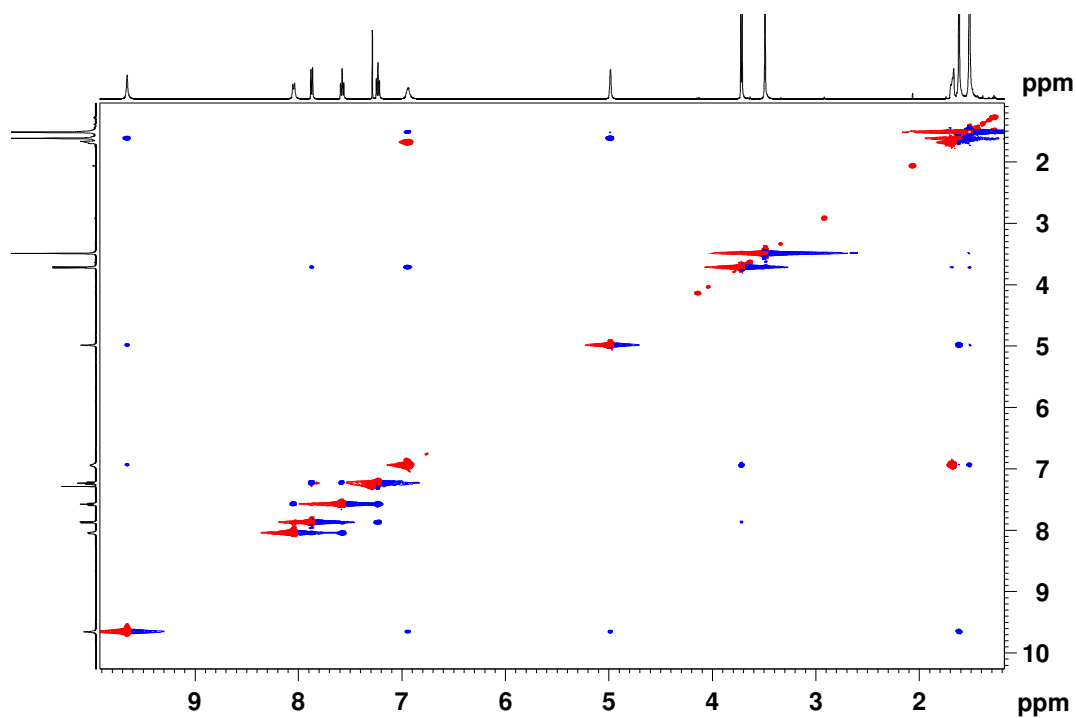

(b)

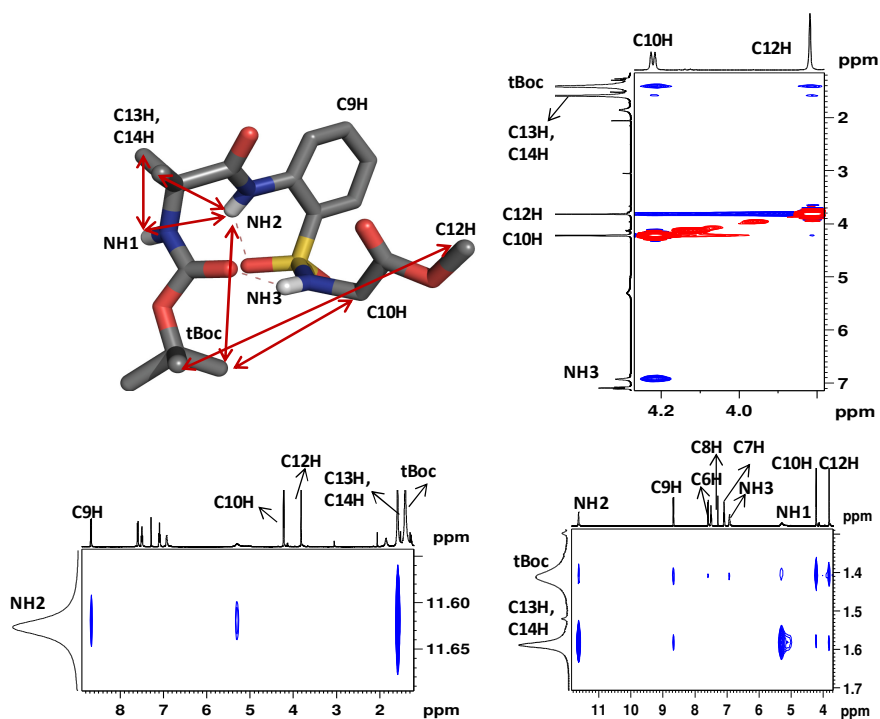

**Fig. 8:** (a) Full 2D NOESY spectrum of **1** (400MHz, CDCl<sub>3</sub>) and (b) selected 2D excerpts of **1**.

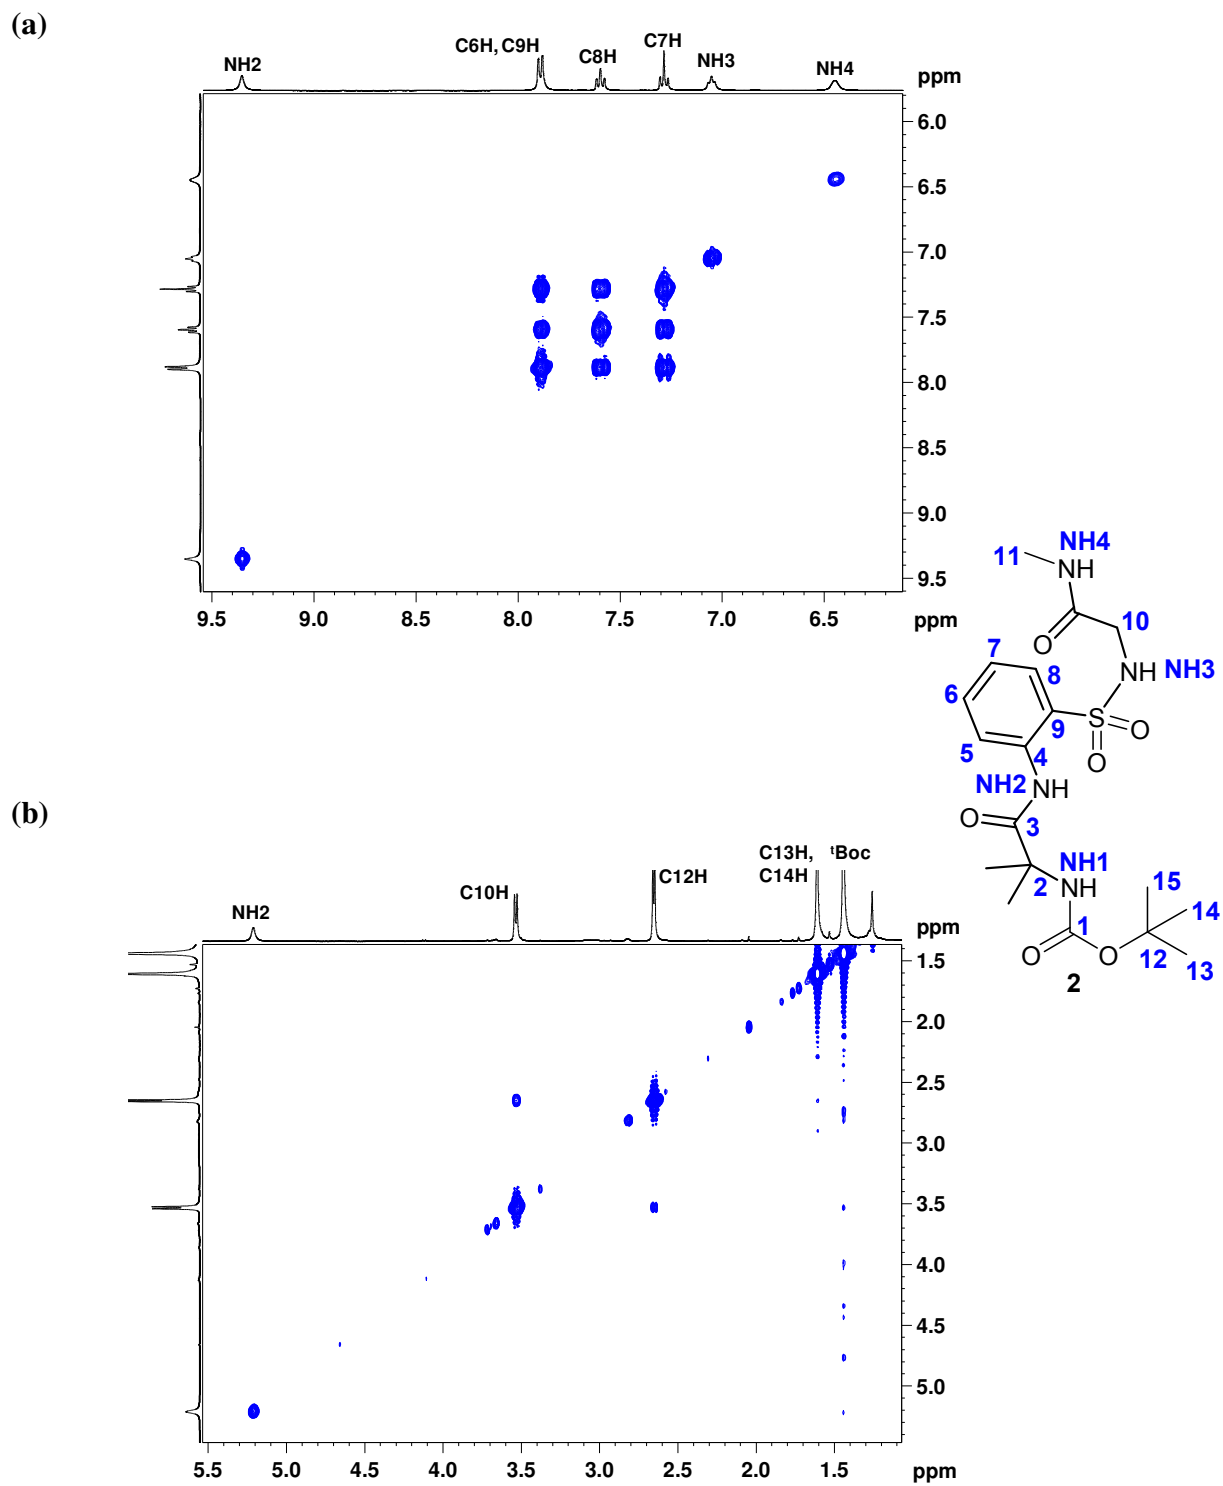

**Fig. 9:** Partial COSY spectra of **2** (400MHz,  $\text{CDCl}_3$ ): aromatic (a) and aliphatic (b) regions.

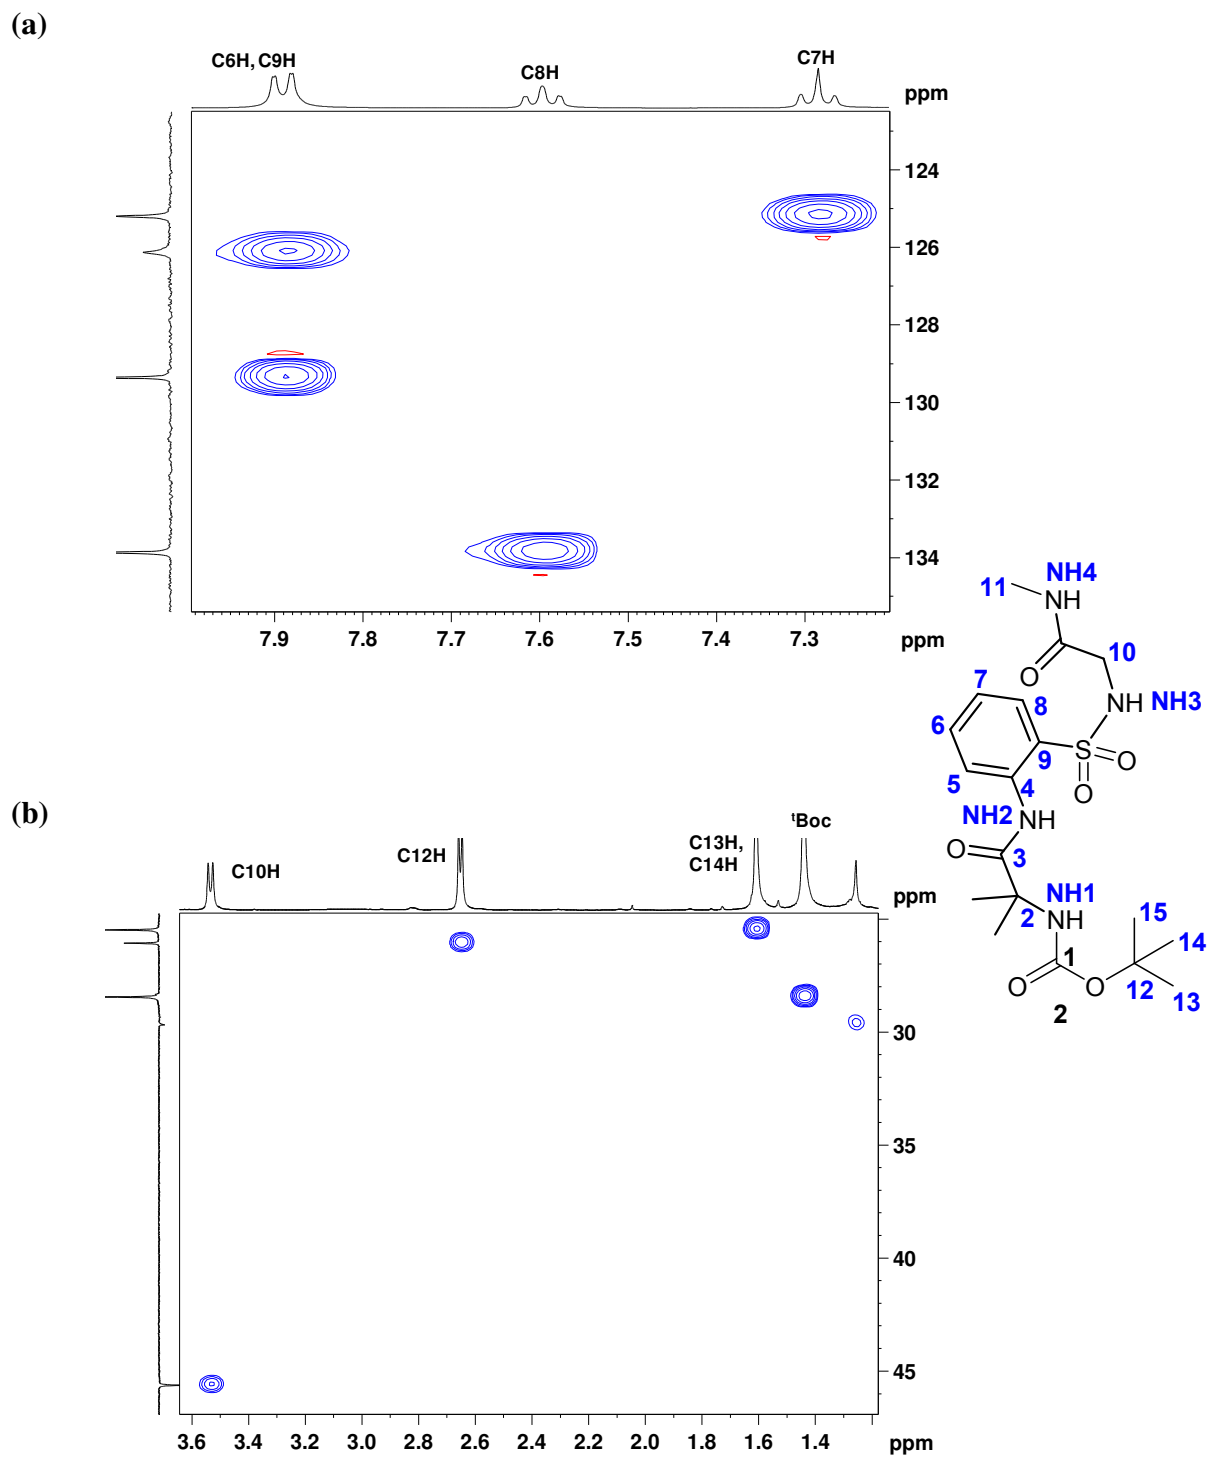

**Fig. 10:** Partial HSQC spectra of **2** (400MHz,  $\text{CDCl}_3$ ): aromatic (a) and aliphatic (b) regions.

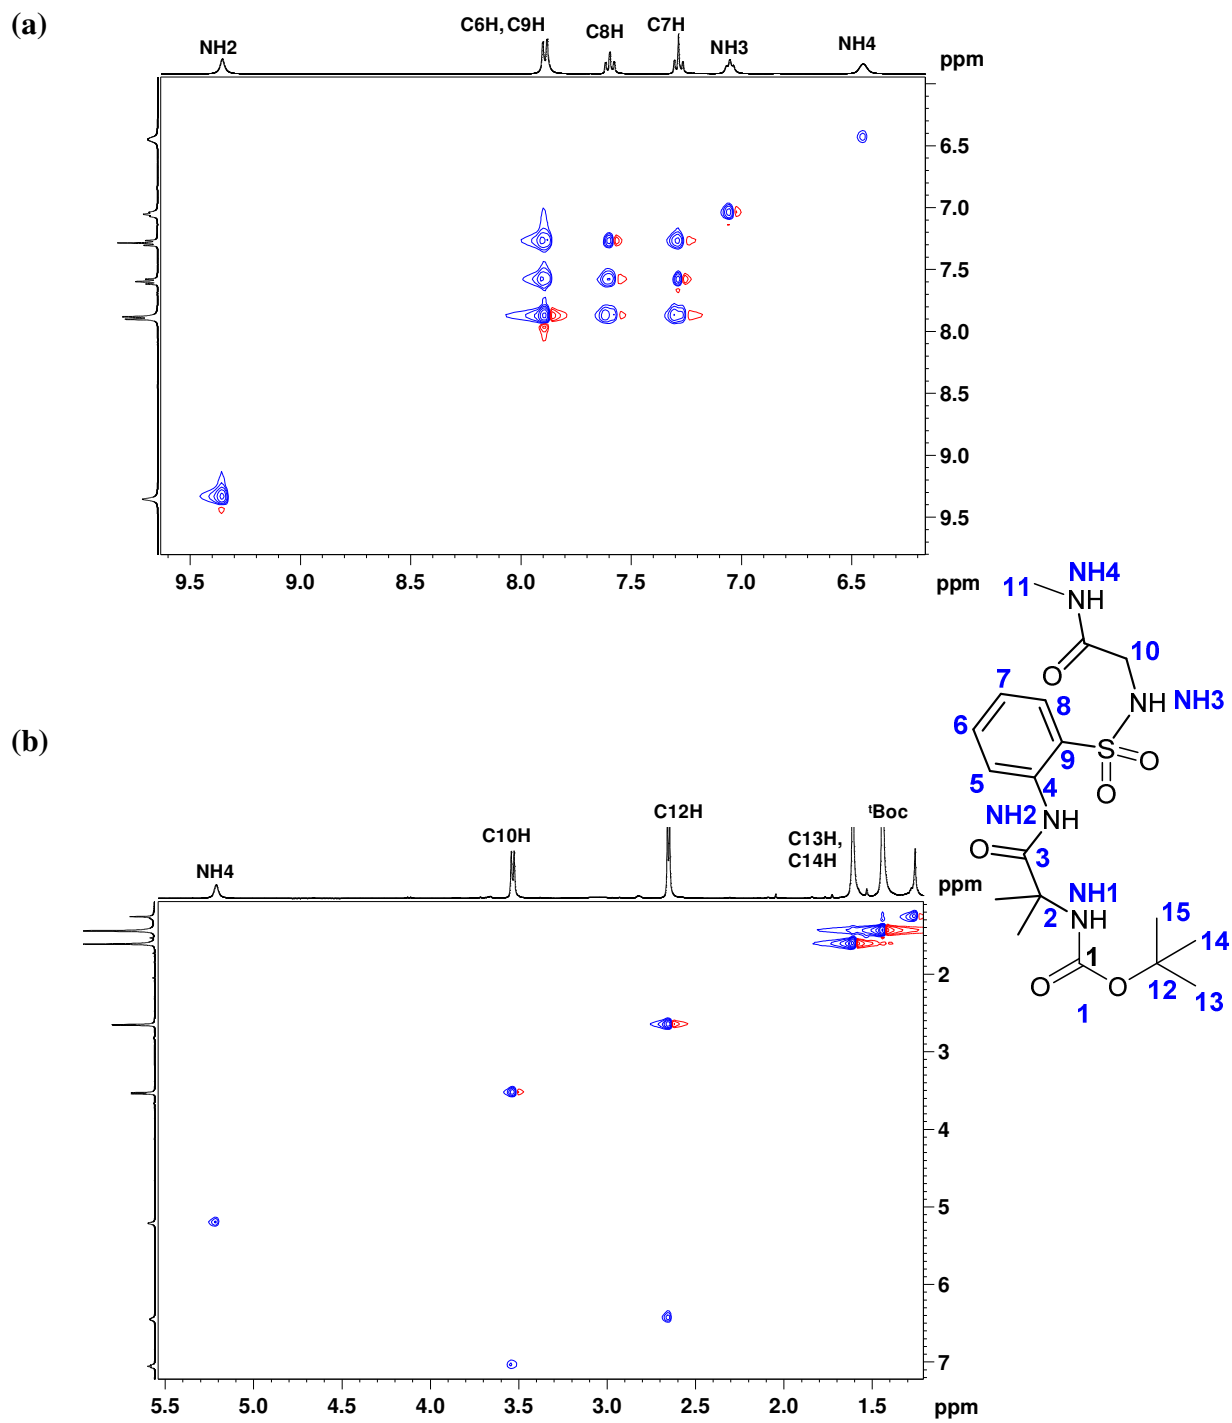

**Fig. 11:** Partial TOCSY spectra of **2** (400MHz, CDCl<sub>3</sub>): aromatic (a) and aliphatic (b) regions.

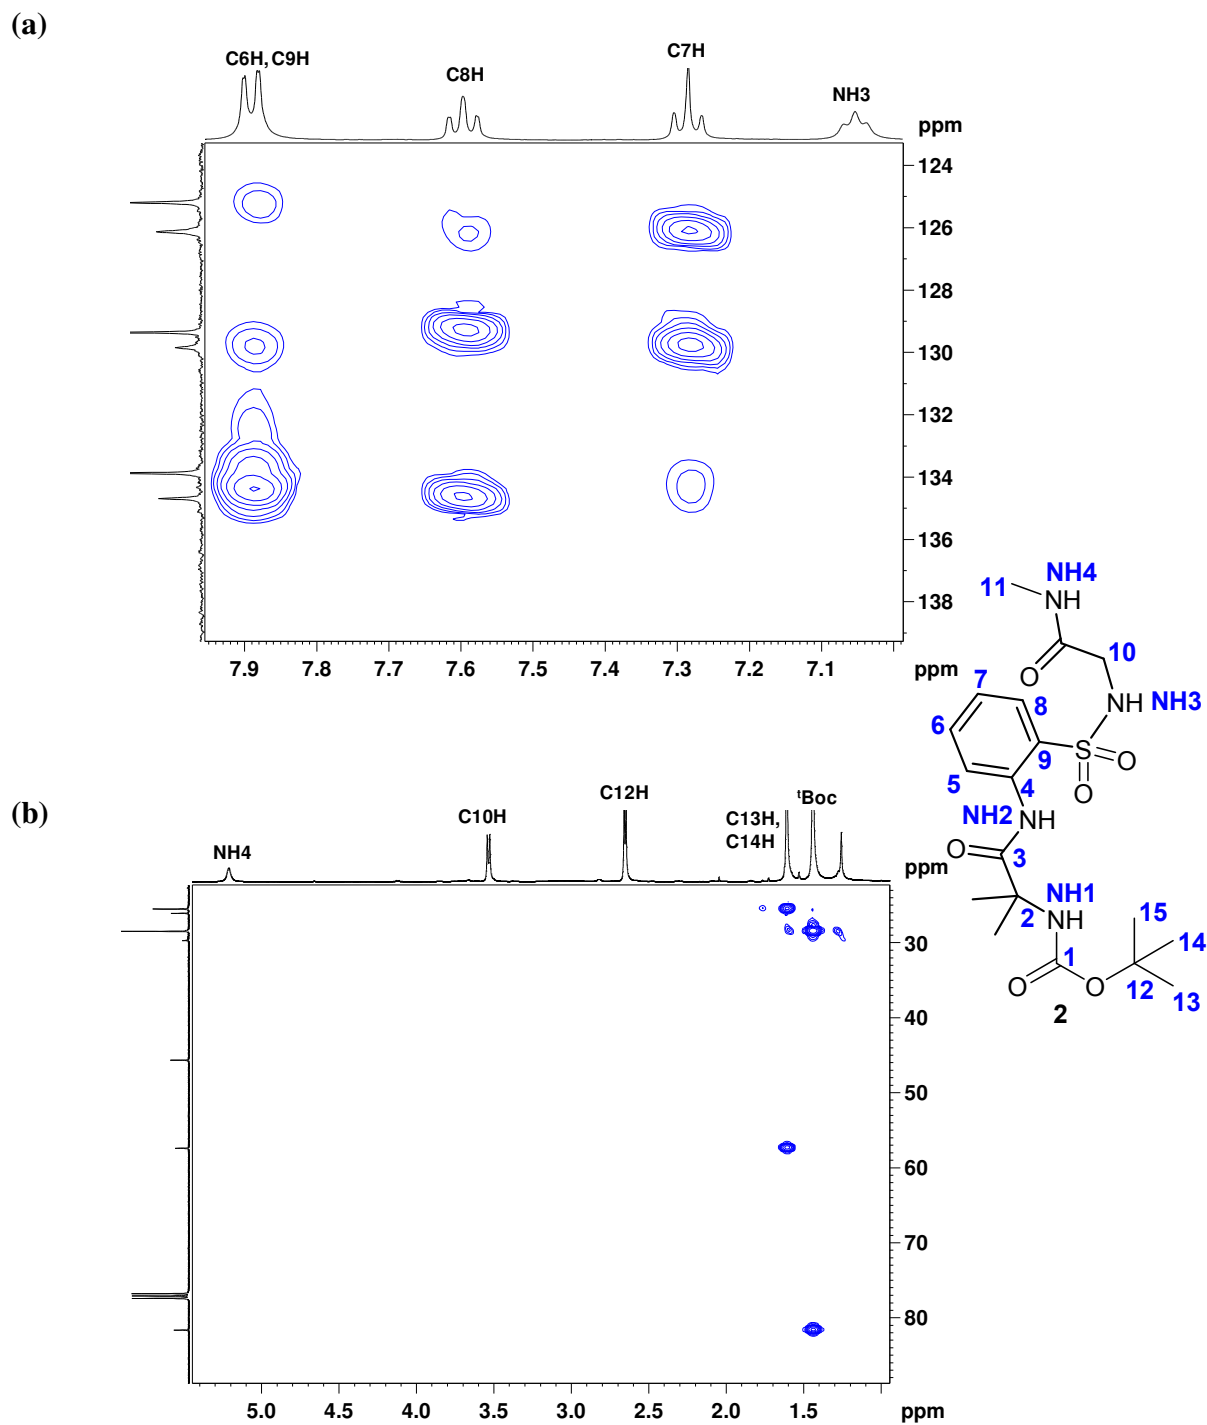

**Fig. 12:** Partial HMBC spectra of **2** (400MHz,  $\text{CDCl}_3$ ): aromatic (a) and aliphatic (b) regions.

(a)

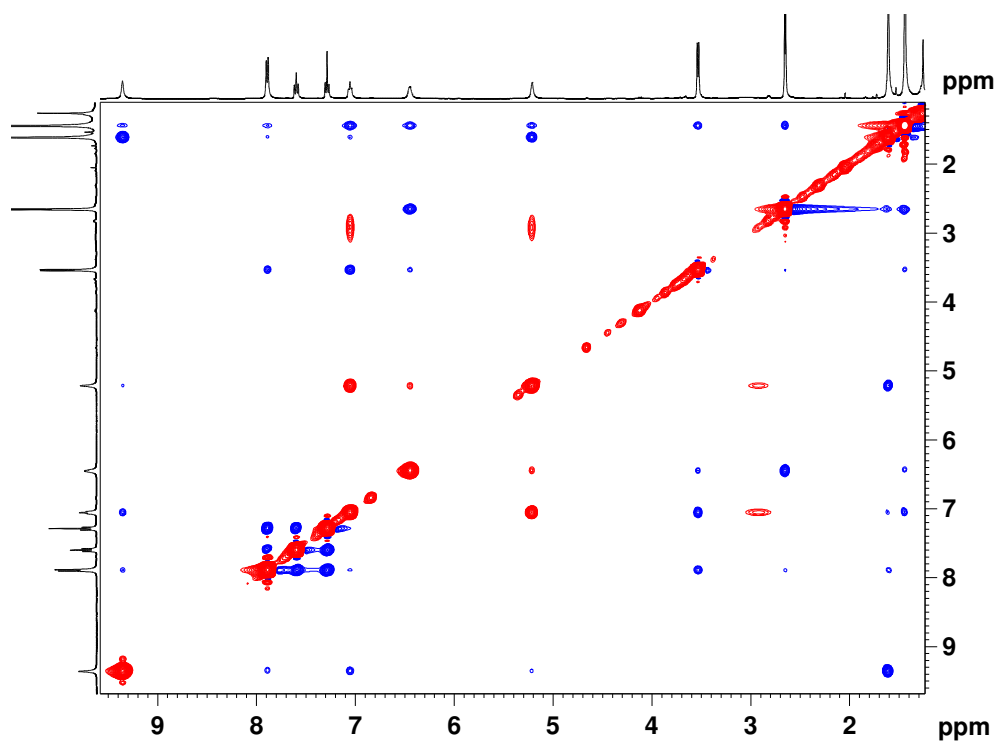

Fig. 13: (a) Full 2D NOESY spectrum of **2** (400MHz, CDCl<sub>3</sub>).

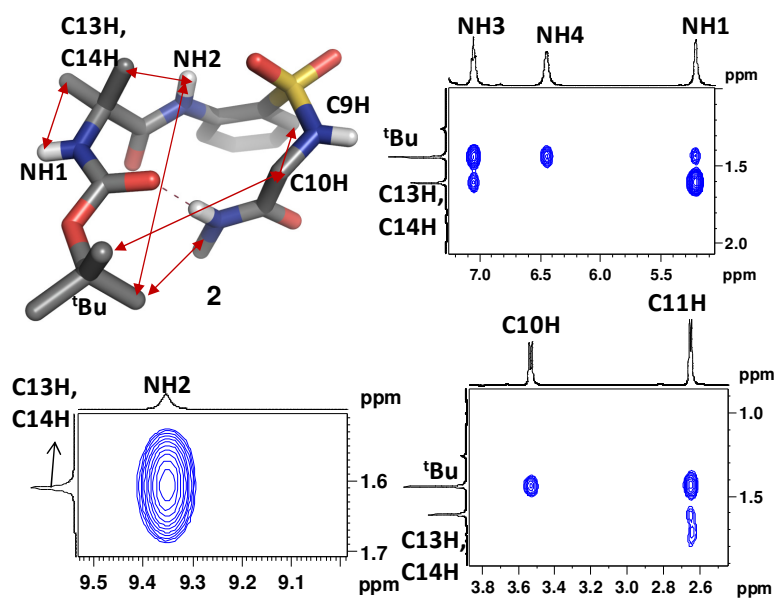

Fig. 13: (a) Full 2D NOESY spectrum of **2** (400MHz, CDCl<sub>3</sub>) and (b) selected 2D excerpts of **2**.

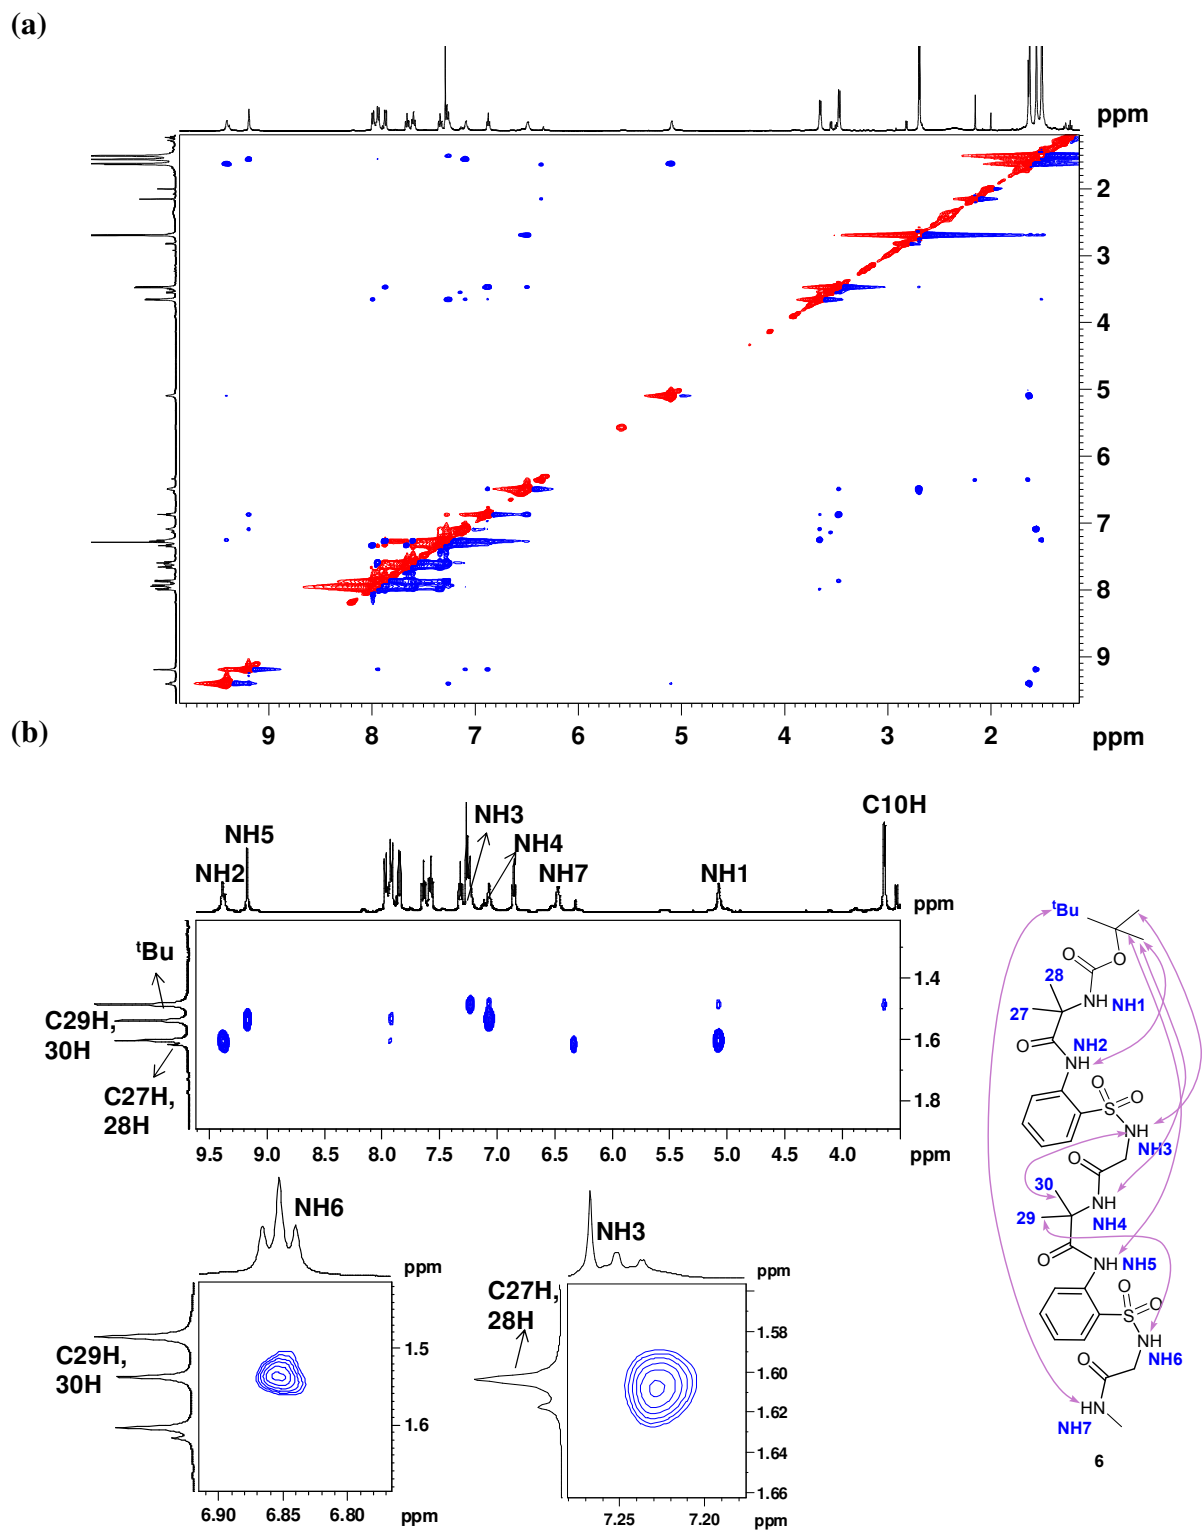



(a)

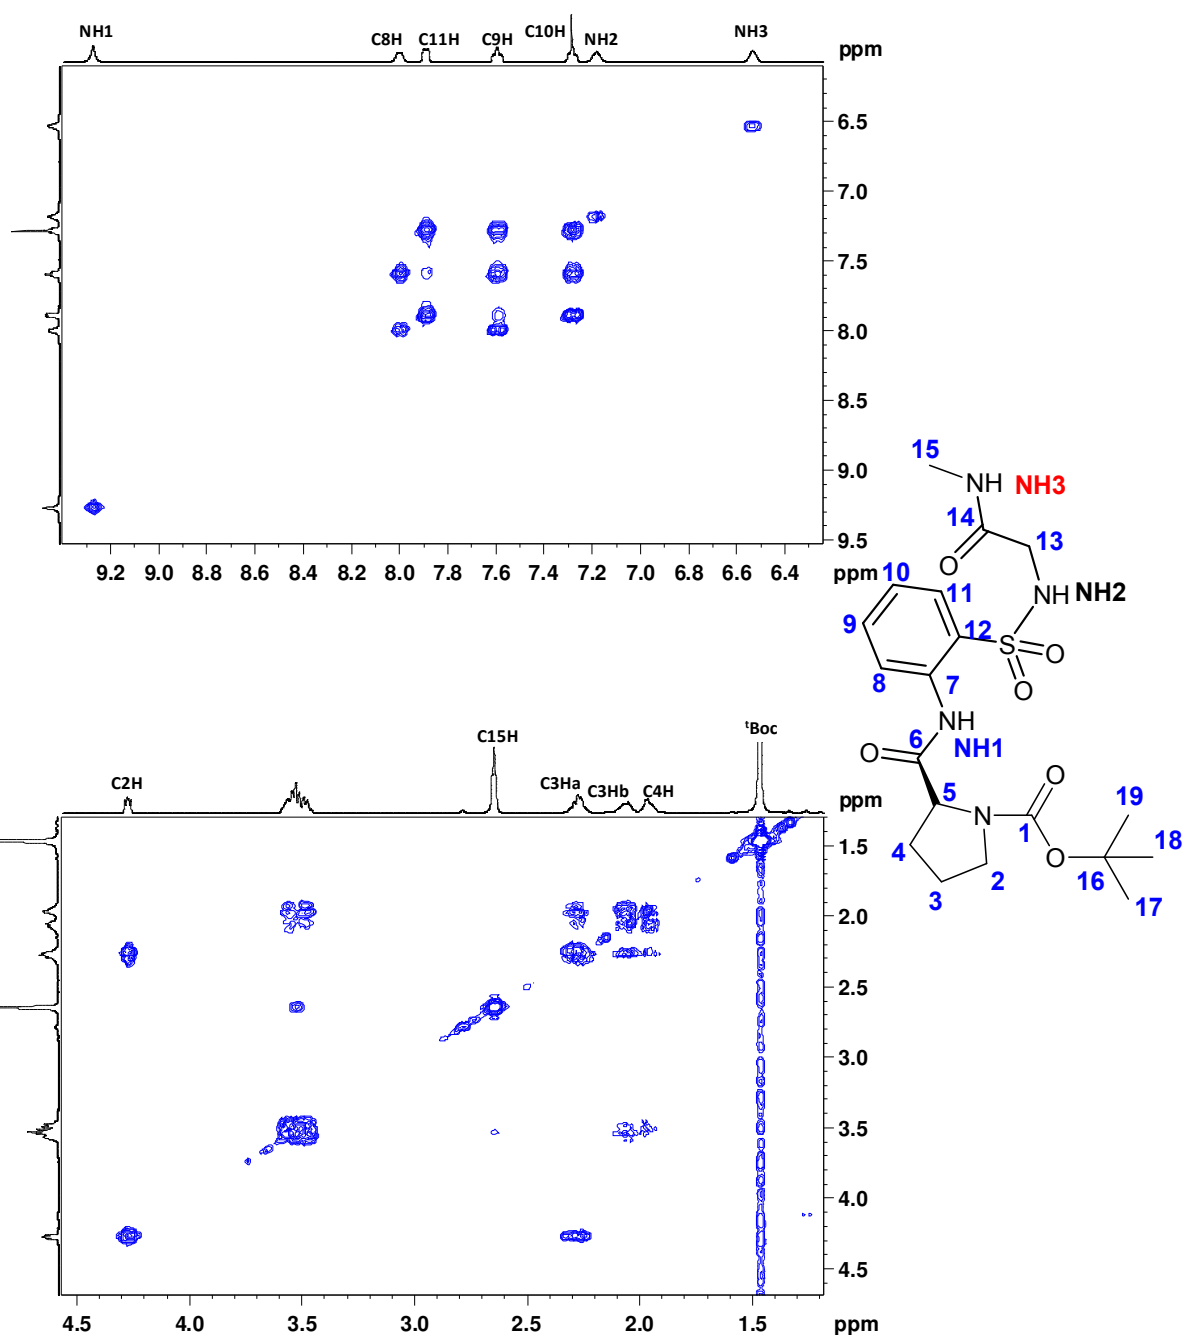

**Fig. 15:** Partial COSY spectra of 3 (400MHz, CDCl<sub>3</sub>): aromatic (a) and aliphatic (b) regions.

(a)

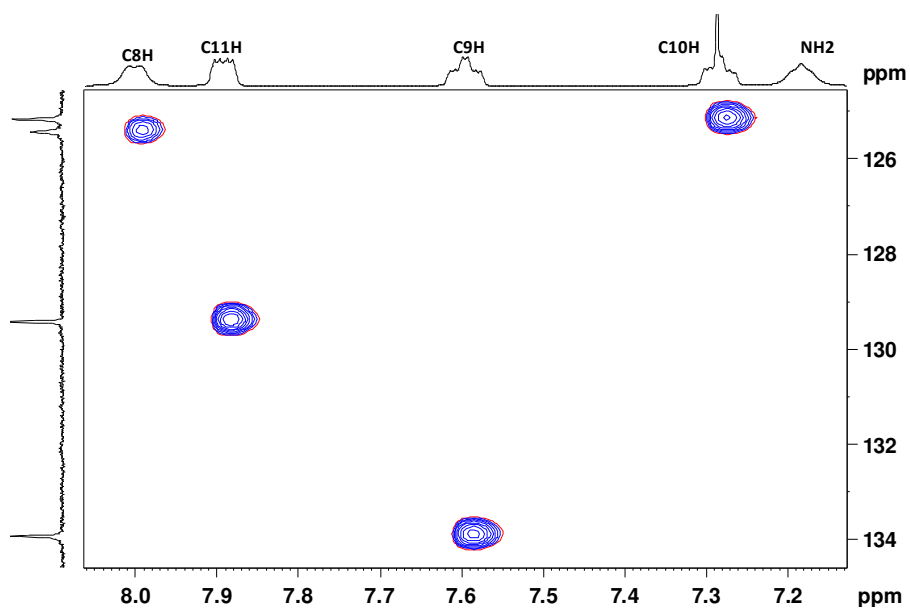

(b)

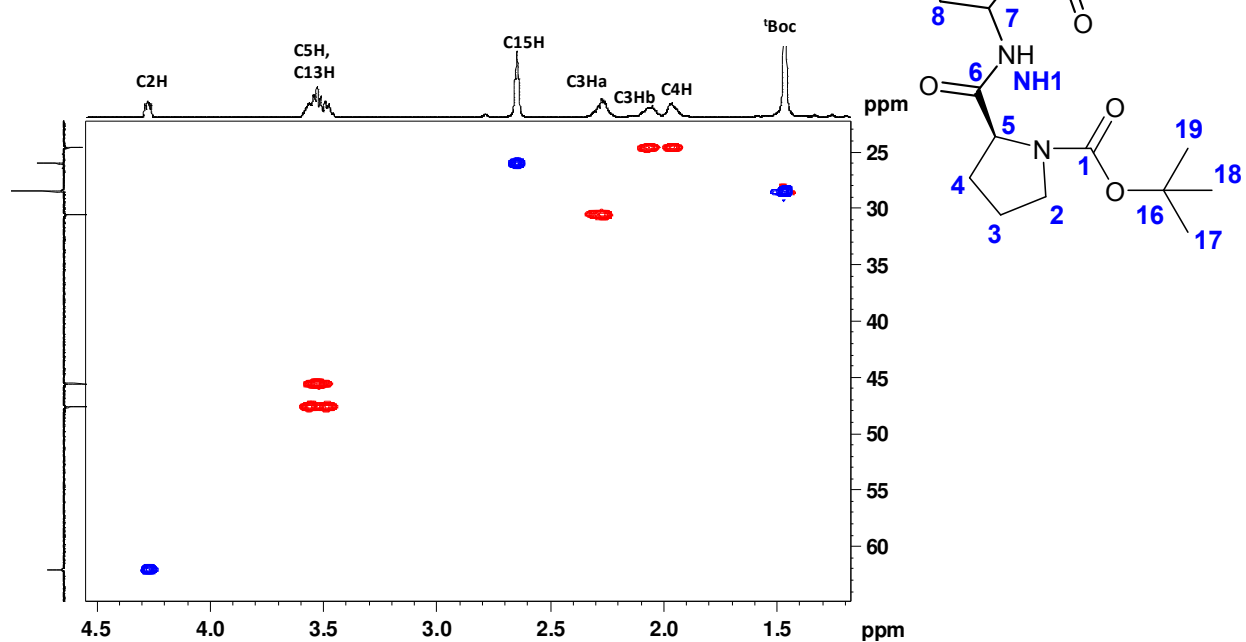

**Fig. 16:** Partial HSQC spectra of **3** (400MHz,  $\text{CDCl}_3$ ): aromatic (a) and aliphatic (b) regions.

(a)

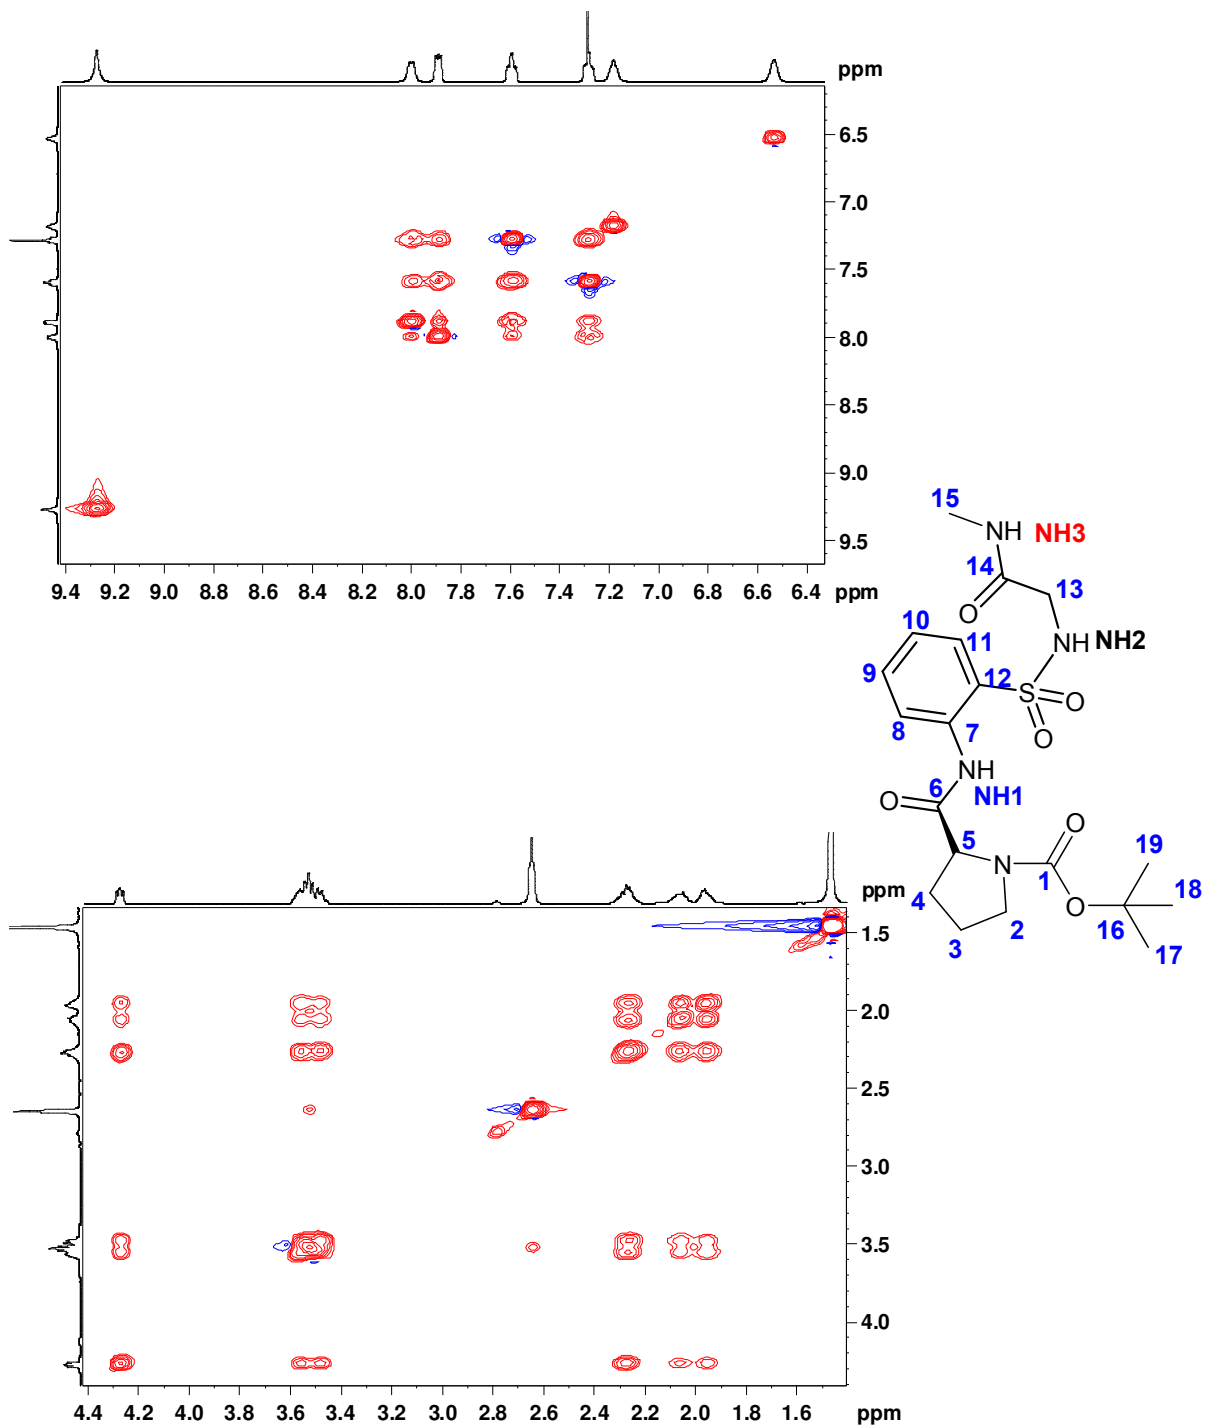

**Fig. 17:** Partial TOCSY spectra of **3** (400MHz, CDCl<sub>3</sub>): aromatic (a) and aliphatic (b) regions.

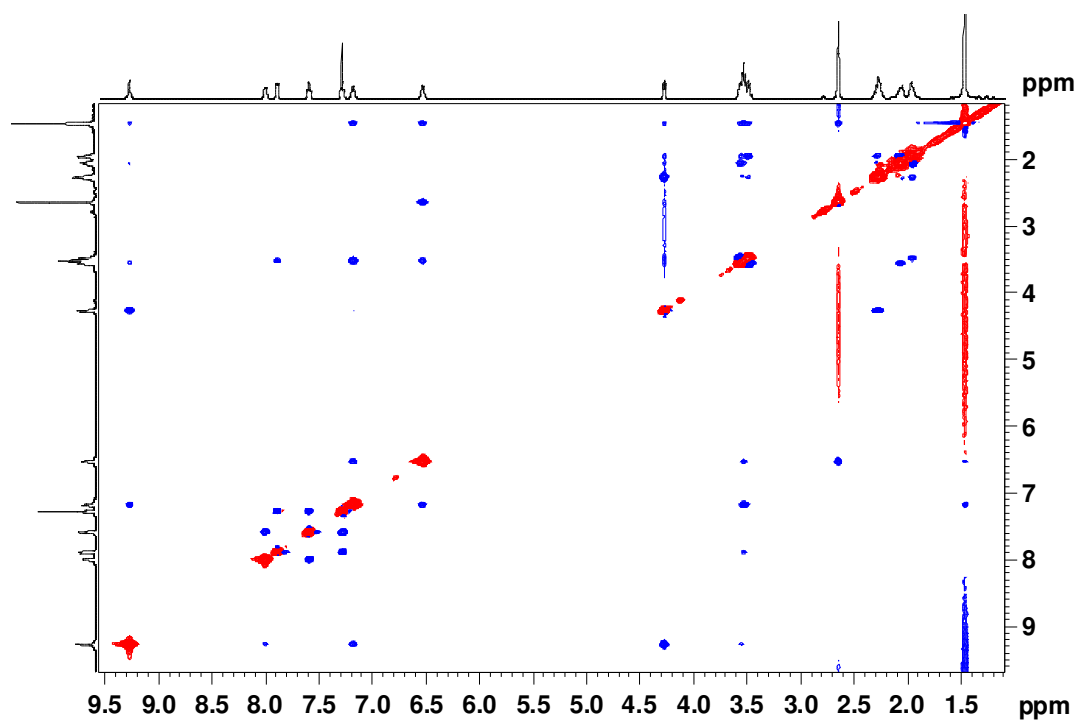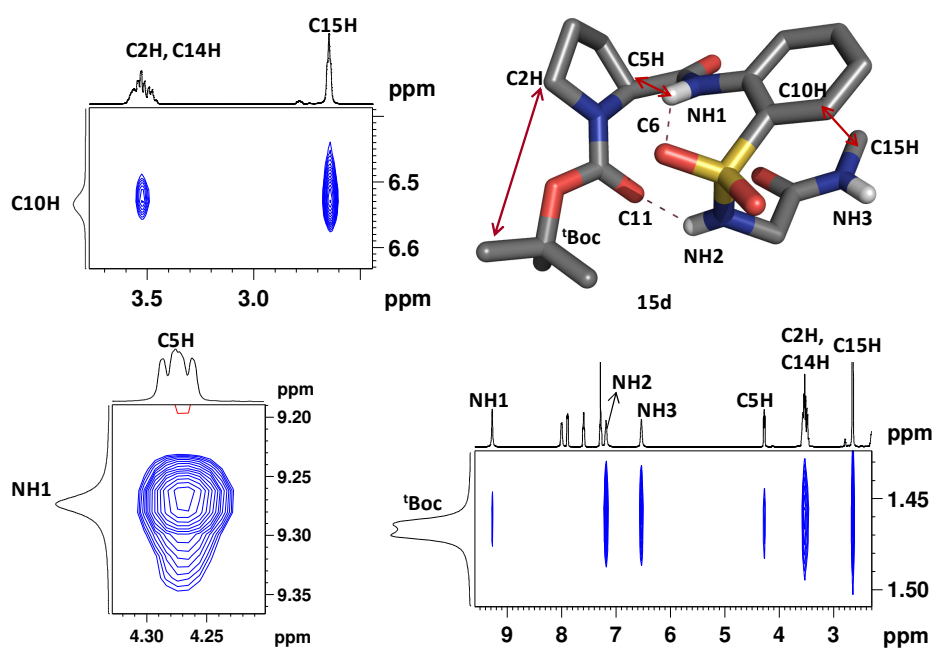

**Fig. 18:** (a) Full 2D NOESY spectrum of **3** (400MHz, CDCl<sub>3</sub>). (b) Selected 2D excerpts of **3**.

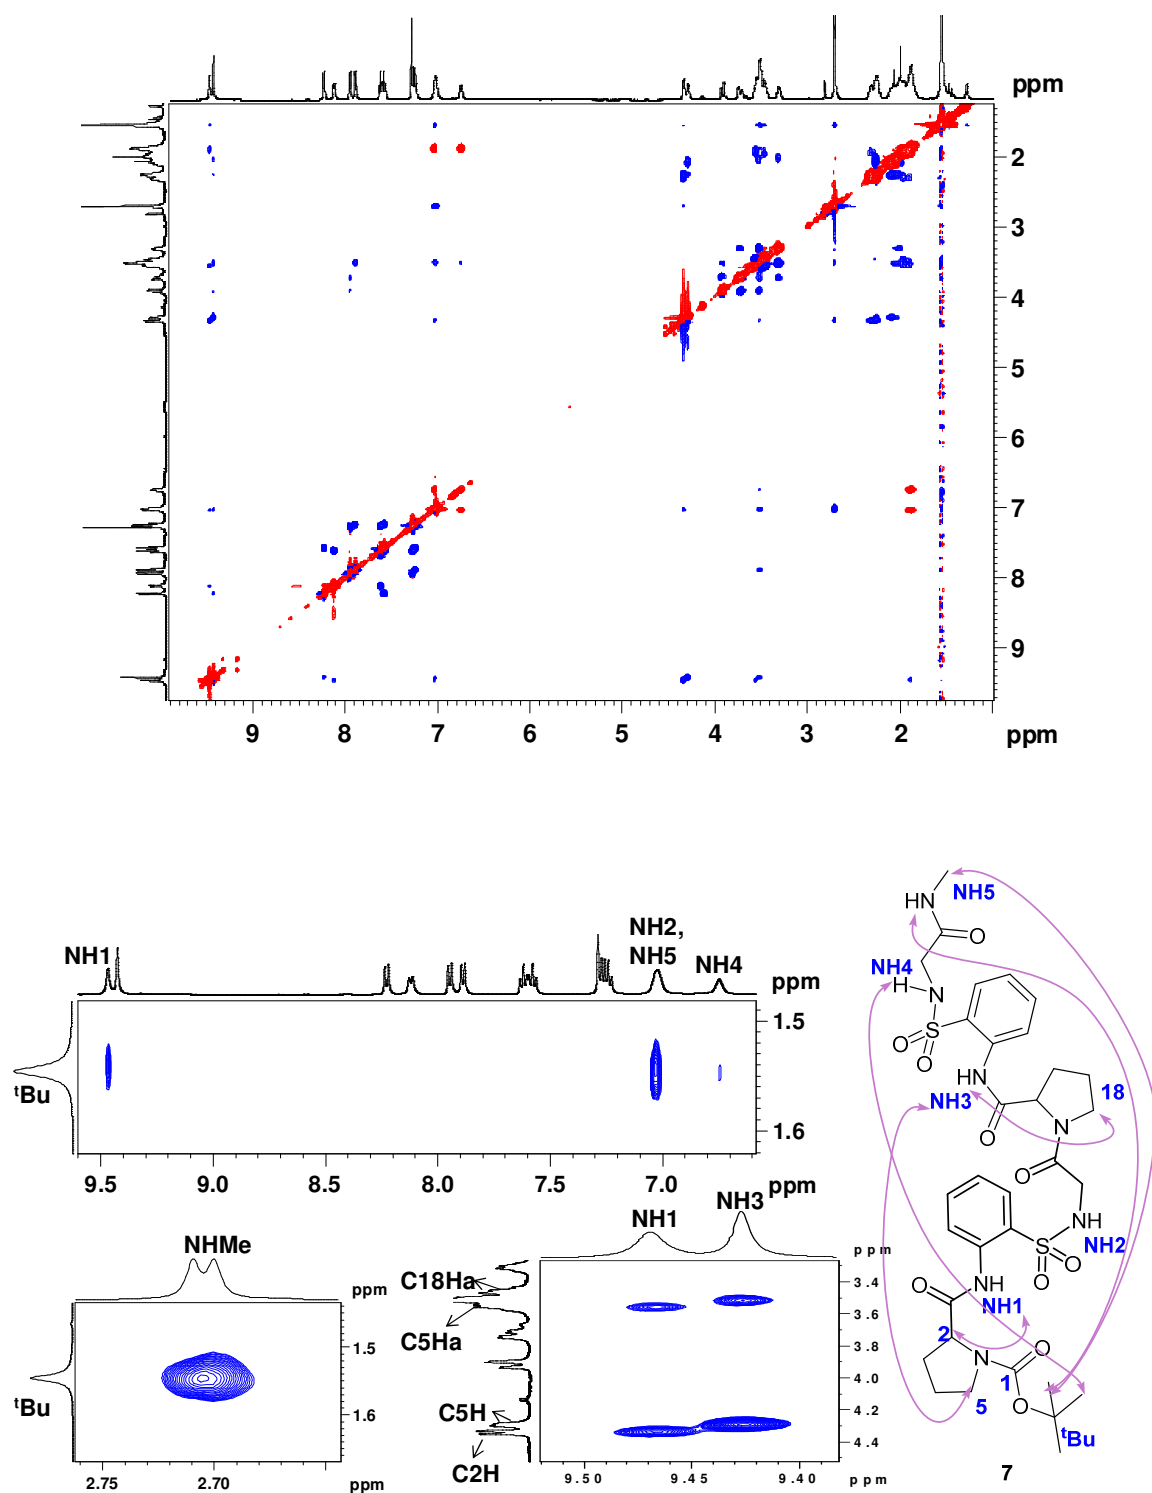

**Fig. 19:** (a) Full 2D NOESY spectrum of **7** (400MHz, CDCl<sub>3</sub>). (b) Selected 2D excerpts of **7**.  
*Note:* The stereochemistry of prolines in **7** is 'S'

(a)

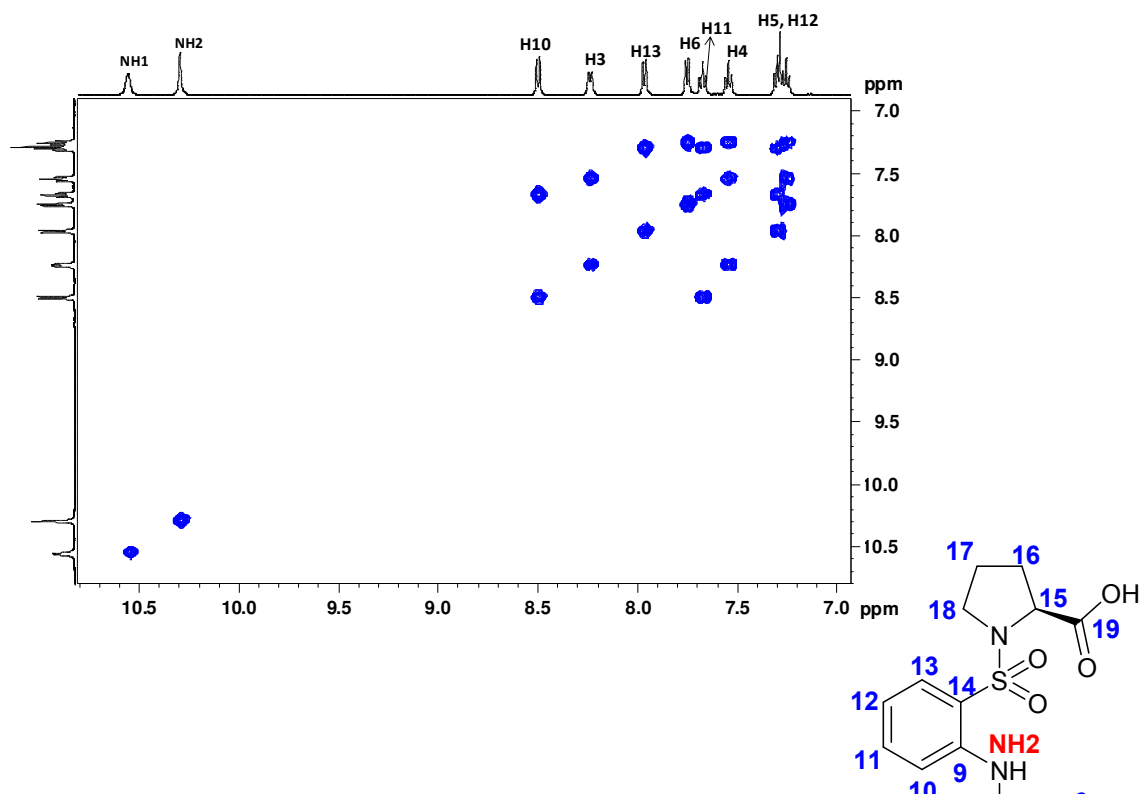

(b)

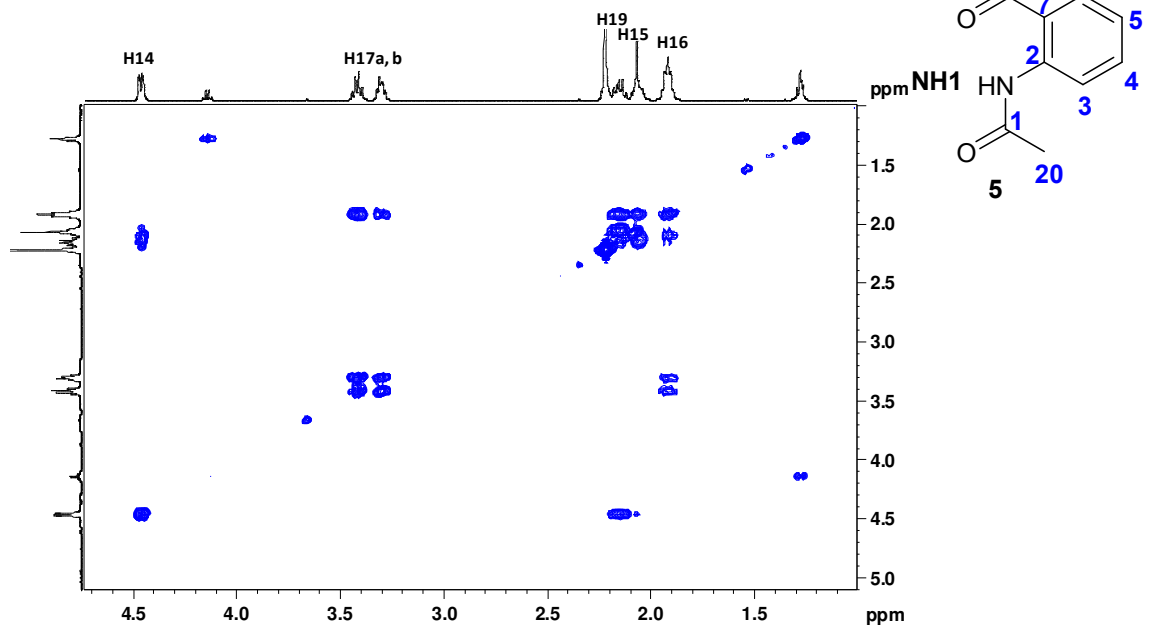

**Fig. 20:** Partial COSY spectra of **5** (400MHz, CDCl<sub>3</sub>): aromatic (a) and aliphatic (b) regions.

(a)

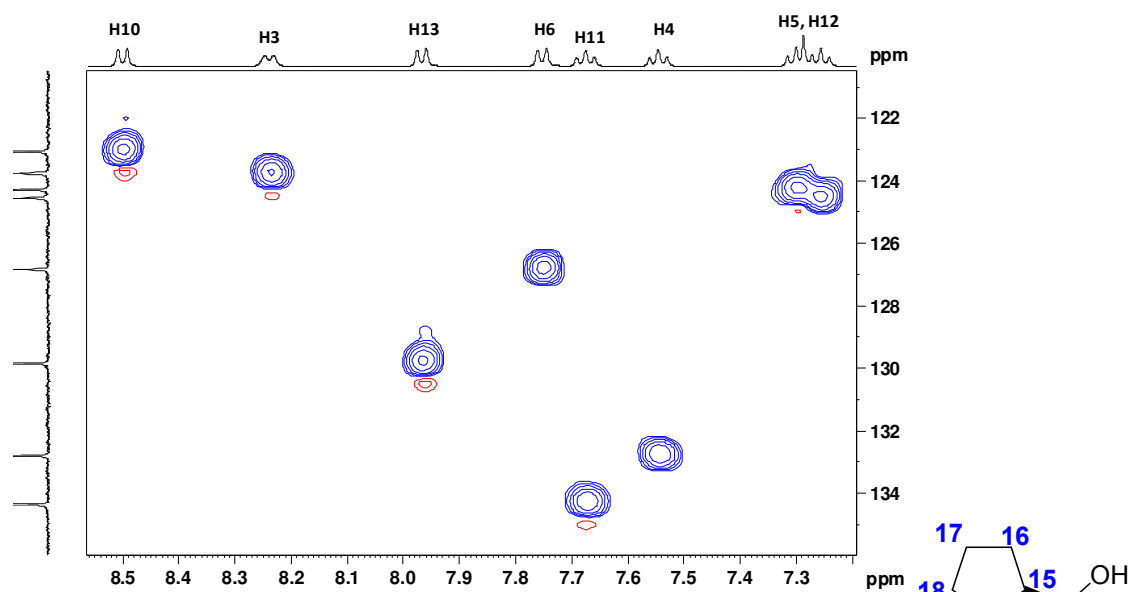

(b)

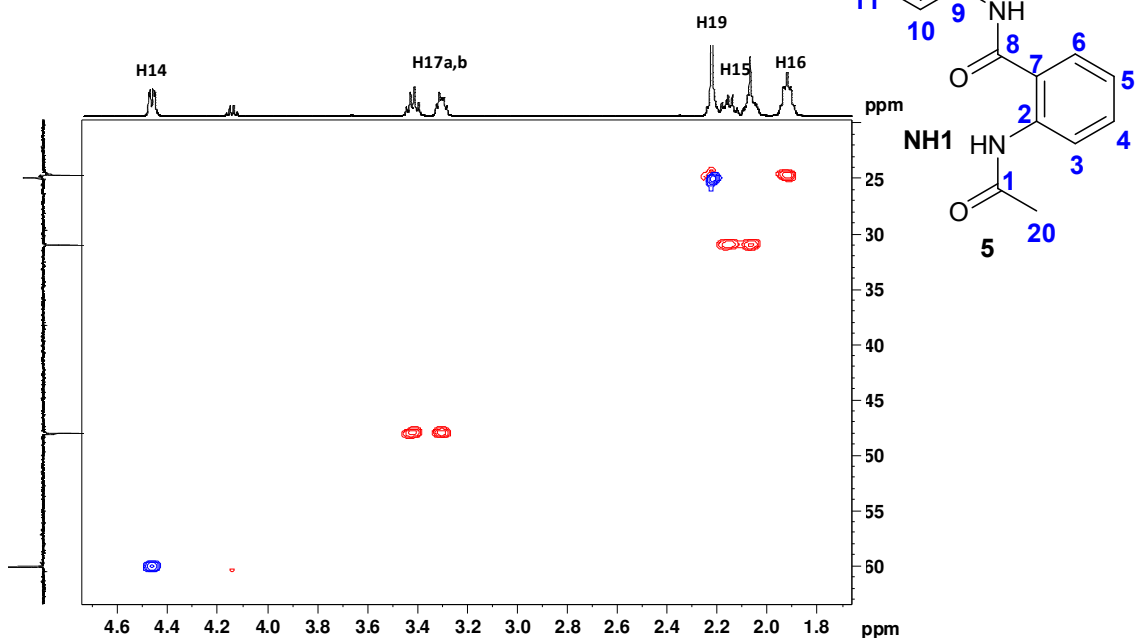

**Fig. 21:** Partial HSQC spectra of **5** (400MHz, CDCl<sub>3</sub>): aromatic (a) and aliphatic (b) regions.

(a)

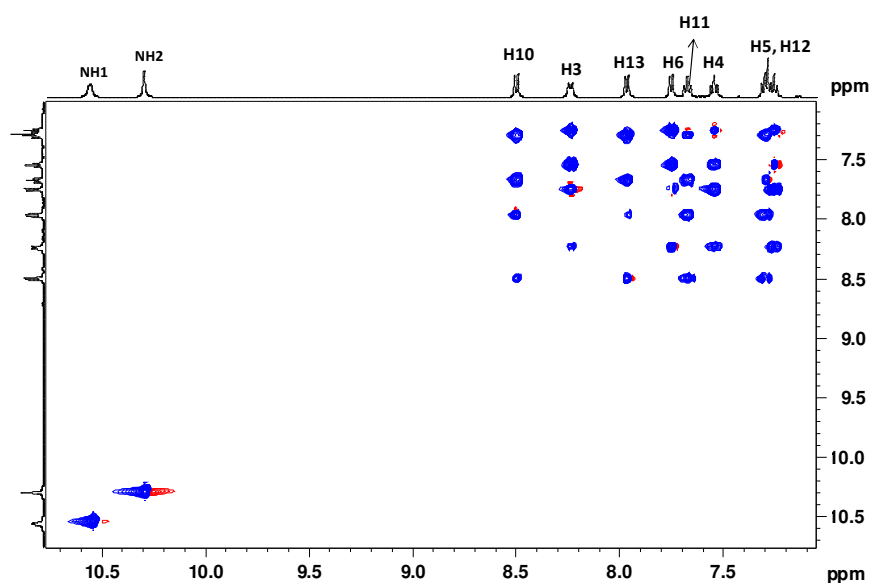

(b)

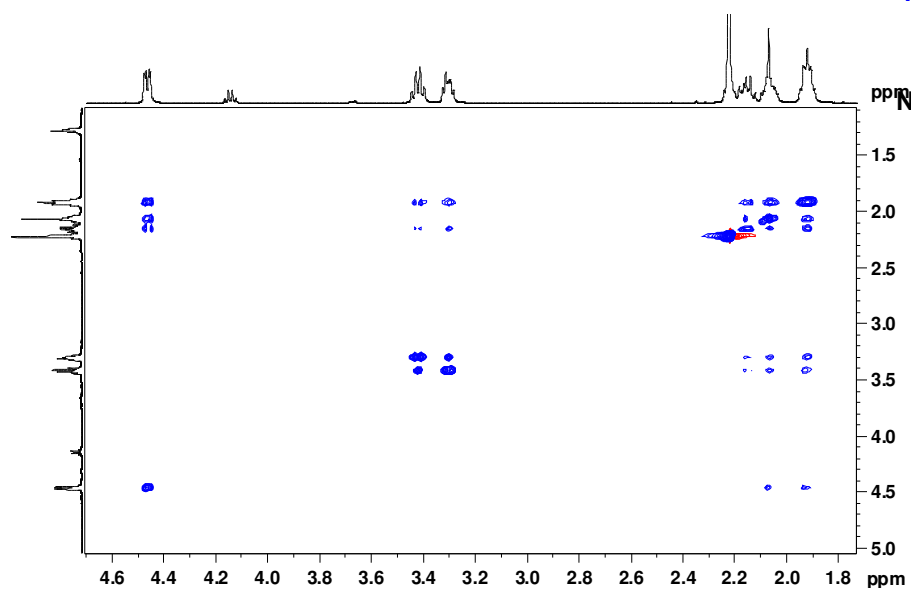

**Fig. 22:** Partial TOCSY spectra of **5** (400MHz, CDCl<sub>3</sub>): aromatic (a) and aliphatic (b) regions.



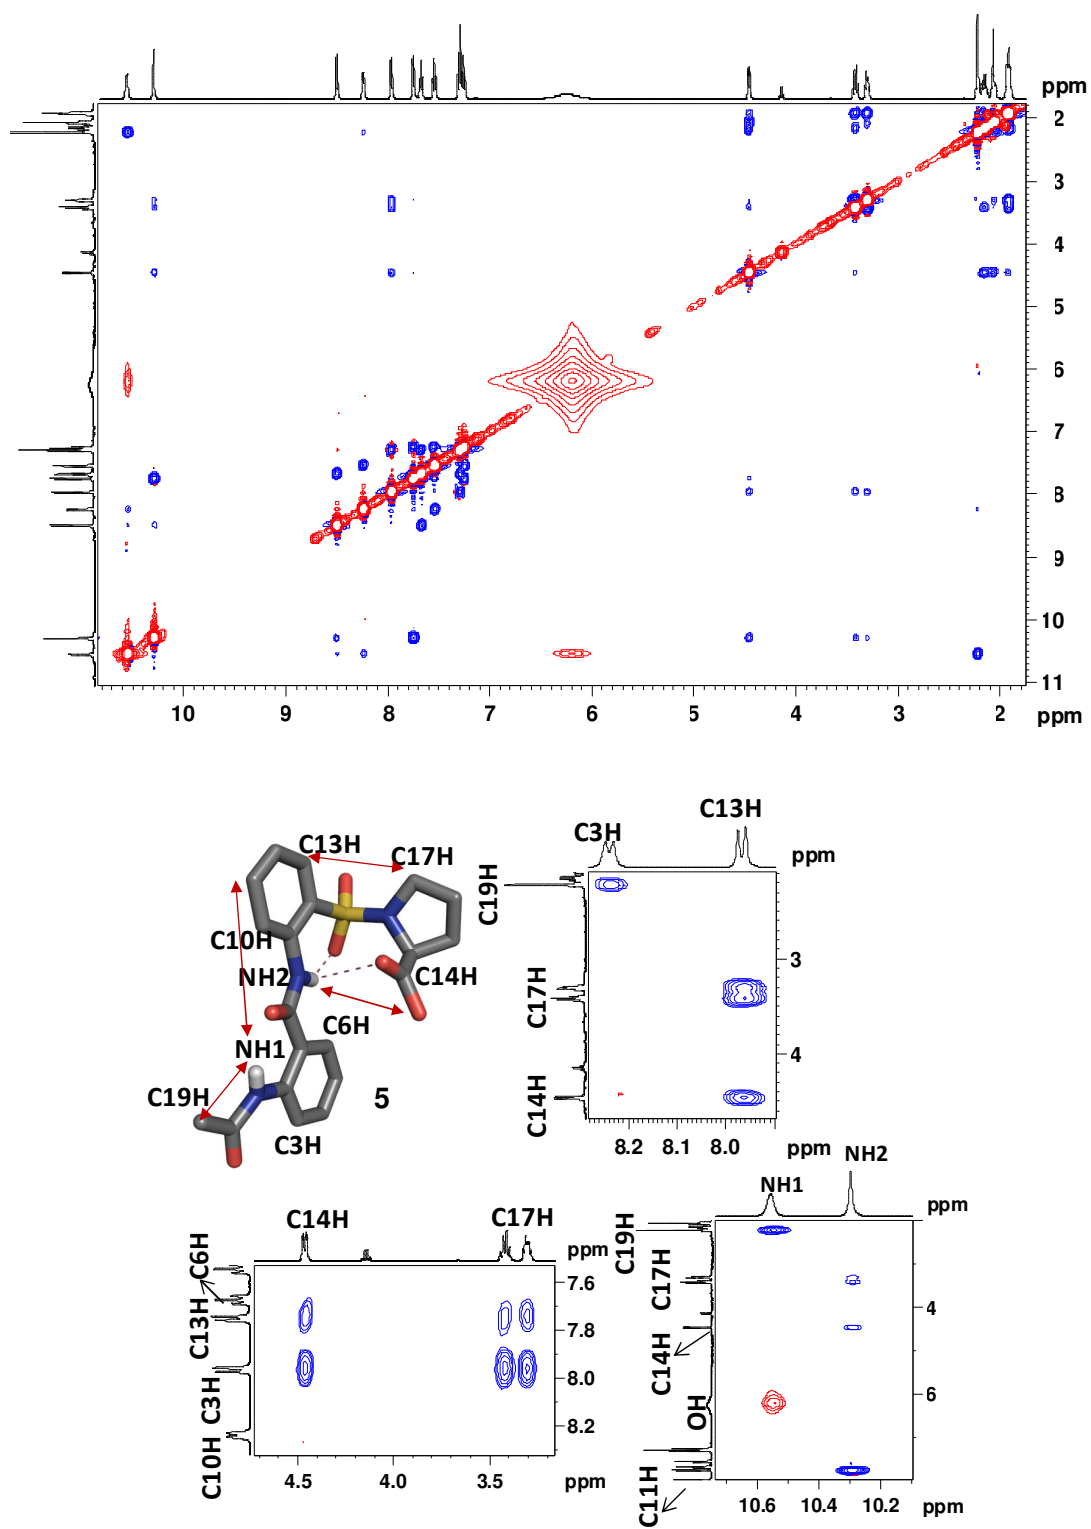

**Fig. 23:** (a) Full 2D NOESY spectrum of **5** (400MHz, CDCl<sub>3</sub>). (b) Selected 2D excerpts of **5**.

## Molecular Dynamics

### Compound 1

| (F2)   | (F1)   | Upper bound | Lower bound | Between   |
|--------|--------|-------------|-------------|-----------|
| 8.0303 | 7.5553 | 2.684       | 2.196       | 5/6H      |
| 7.5636 | 7.212  | 2.718592    | 2.224303    | 6/7H      |
| 9.6396 | 6.9224 | 3.363521    | 2.751972    | NH3/NH2   |
| 9.637  | 4.9697 | 3.314141    | 2.71157     | NH1/NH2   |
| 9.6396 | 1.6036 | 2.784664    | 2.278361    | NH2/17/18 |
| 9.6423 | 1.5017 | 3.9166      | 3.204491    | NH2/BOC   |
| 8.0303 | 1.5983 | 3.985347    | 3.260738    | 5/17/18H  |
| 7.856  | 3.7011 | 3.323854    | 2.719517    | 8/10H     |
| 6.9307 | 1.499  | 2.910141    | 2.381024    | BOC/NH3   |
| 6.928  | 3.7011 | 2.828308    | 2.31407     | NH3/10    |
| 4.9727 | 1.499  | 3.426222    | 2.803272    | NH1/BOC   |
| 4.9727 | 1.5983 | 2.511948    | 2.055231    | NH1/17/18 |
| 3.704  | 1.4963 | 3.52523     | 2.884279    | 10/BOC    |
| 3.476  | 1.5017 | 3.650256    | 2.986573    | OMe/BOC   |
| 3.476  | 1.609  | 4.493942    | 3.676861    | OMe/17/18 |

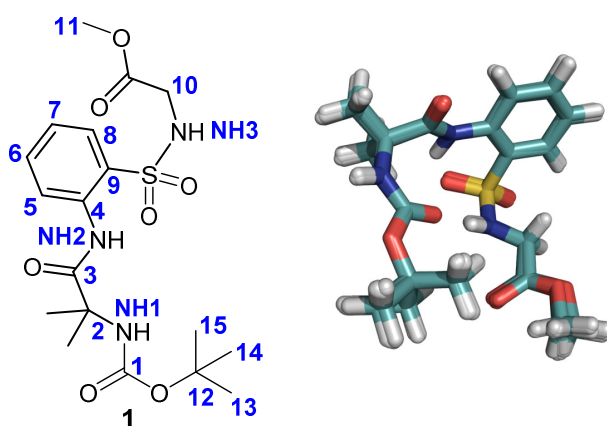

**Fig. 24:** Molecular structure of compound 1(left) and 20 minimum energy structures overlaid with the crystal of 1(right).

### Compound 2

| (F2)<br>[ppm] | (F1)<br>[ppm] | Upper<br>bound | Lower<br>bound | Between   |
|---------------|---------------|----------------|----------------|-----------|
| 7.6326        | 7.0607        | 2.684          | 2.196          | 8/7H      |
| 7.4791        | 7.0537        | 2.6683         | 2.183154       | 7/6H      |
| 8.574         | 7.4652        | 2.579017       | 2.110105       | 5/6H      |
| 11.6424       | 1.5585        | 2.816481       | 2.304394       | NH2/19/18 |
| 5.4568        | 1.5585        | 2.686452       | 2.198006       | NH1/BOC   |
| 8.567         | 1.3842        | 5.720153       | 4.680125       | BOC/5     |
| 7.6395        | 1.4051        | 4.913939       | 4.020496       | BOC/8     |
| 7.6395        | 4.0063        | 3.293398       | 2.694599       | 11/NH3    |
| 6.5726        | 4.0272        | 3.422157       | 2.799947       | 11/NH4    |
| 6.6981        | 2.8138        | 2.738348       | 2.240467       | NH4/NHMe  |

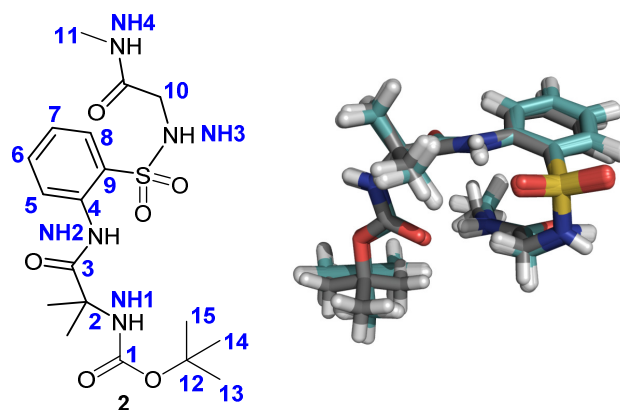

**Fig. 25:** Molecular structure of compound **2** (left) and 20 minimum energy structures overlaid with the crystal of **2**(right).

### Compound 3

| (F2)<br>[ppm] | (F1)<br>[ppm] | Upper<br>bound | Lower<br>bound | Between      |
|---------------|---------------|----------------|----------------|--------------|
| 7.9978        | 7.5825        | 2.684          | 2.196          | H11/H12      |
| 7.5964        | 7.2688        | 2.696757       | 2.206438       | H11/H10      |
| 9.2712        | 7.9885        | 4.392856       | 3.594155       | NH1/H12      |
| 9.2758        | 7.1673        | 3.154809       | 2.581207       | NH1/NH2      |
| 9.2712        | 6.5305        | 5.45429        | 4.462601       | NH1/NH3      |
| 9.2758        | 4.2697        | 2.616967       | 2.141155       | NH1/2H       |
| 9.2712        | 3.5315        | 3.694086       | 3.022434       | NH1/13H/5A/B |
| 9.2758        | 2.2488        | 4.523345       | 3.700918       | NH1/3A/B     |

|        |        |          |          |          |
|--------|--------|----------|----------|----------|
| 9.2712 | 2.0458 | 4.251398 | 3.478416 | NH1/4A/B |
| 9.2712 | 1.4644 | 5.022962 | 4.109696 | NH1/BOC  |
| 7.1857 | 1.4644 | 3.310548 | 2.70863  | BOC/NH2  |
| 6.5351 | 1.4644 | 3.460344 | 2.83119  | BOC/NH1  |
| 4.2697 | 1.4552 | 4.556337 | 3.727912 | BOC/2H   |
| 3.5269 | 1.4552 | 3.212379 | 2.62831  | BOC/13H  |
| 2.6502 | 1.4552 | 3.514687 | 2.875653 | BOC/NHMe |
| 7.9978 | 2.258  | 4.412825 | 3.610493 | H12/3A/B |
| 7.9978 | 2.6364 | 5.38997  | 4.409975 | H12/NHMe |
| 7.887  | 3.513  | 3.434231 | 2.809825 | 9H/13H   |
| 7.9978 | 4.2605 | 6.37174  | 5.213241 | 2H/12H   |
| 7.8824 | 6.5213 | 5.827683 | 4.768104 | 9H/NH3   |
| 7.1811 | 6.5213 | 3.147128 | 2.574923 | NH3/NH2  |
| 7.1811 | 4.2605 | 4.401099 | 3.6009   | NH2/2H   |
| 7.1719 | 3.5222 | 2.71477  | 2.221176 | NH2/13H  |
| 7.5964 | 2.6364 | 5.901956 | 4.828873 | NHMe/11H |
| 7.2872 | 2.6364 | 5.997773 | 4.907269 | NHMe/10H |
| 6.5398 | 2.6364 | 2.814807 | 2.303024 | NHMe/NH3 |
| 6.5305 | 3.5222 | 3.250352 | 2.659379 | 13H/NH3  |
| 6.5305 | 4.2697 | 5.336982 | 4.366622 | NH3/2H   |
| 3.5315 | 2.6364 | 4.324653 | 3.538353 | NHMe/13H |

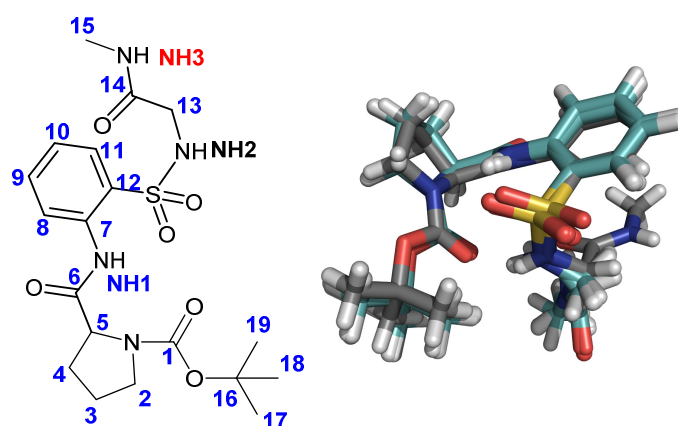

**Fig. 26:** Molecular structure of compound **3** (left) and 20 minimum energy structures overlaid with the crystal of **3** (right). *Note:* The stereochemistry of prolines in **3** is ‘S’

**Compound 6**

| (F2)<br>[ppm] | (F1)<br>[ppm] | Upper<br>bound | Lower<br>bound | Between    |
|---------------|---------------|----------------|----------------|------------|
| 7.8977        | 7.2742        | 2.684          | 2.196          | 8/7H       |
| 7.6061        | 7.2742        | 2.865283       | 2.344323       | 6/7H       |
| 9.351         | 7.8827        | 4.147947       | 3.393775       | NH2/5      |
| 9.351         | 7.0429        | 3.636337       | 2.975185       | NH3/NH2    |
| 9.351         | 5.2074        | 4.142322       | 3.389173       | NH2/NH1    |
| 9.3611        | 1.6017        | 2.823851       | 2.310424       | NH2/17/18  |
| 7.8877        | 1.5967        | 4.414694       | 3.612022       | 5/17/18H   |
| 7.8877        | 2.6376        | 5.674307       | 4.642615       | NHMe/8     |
| 7.8927        | 3.5227        | 3.607189       | 2.951336       | 8/10H      |
| 7.0529        | 1.4408        | 3.567655       | 2.918991       | NH3/BOC    |
| 7.0479        | 1.6017        | 4.233911       | 3.464109       | NH3/17/18  |
| 7.0529        | 3.5277        | 3.216966       | 2.632063       | NH3/10     |
| 6.4444        | 1.4408        | 3.90891        | 3.198199       | NH4/BOC    |
| 6.4494        | 2.6477        | 3.05275        | 2.497704       | NH4/NHMe   |
| 6.4444        | 3.5277        | 3.876314       | 3.171529       | NH4/10     |
| 5.2124        | 1.4307        | 4.554215       | 3.726176       | NH1/BOC    |
| 5.2174        | 1.6017        | 3.139259       | 2.568485       | NH1/17/18  |
| 3.5328        | 1.4357        | 3.866436       | 3.163448       | 10/BOC     |
| 2.6528        | 1.4307        | 3.692889       | 3.021455       | NHMe/BOC   |
| 2.6528        | 1.6117        | 4.658031       | 3.811116       | NHMe/17/18 |

**Compound 7**

| (F2)<br>[ppm] | (F1)<br>[ppm] | Upper<br>Bound | Lower<br>Bound | Between    |
|---------------|---------------|----------------|----------------|------------|
| 8.6312        | 7.5378        | 2.684          | 2.196          | 7/8H       |
| 8.5011        | 7.6619        | 2.629874       | 2.151715       | 13/14      |
| 11.0247       | 8.643         | 4.607795       | 3.770014       | NH1/7      |
| 11.0247       | 8.4952        | 5.772299       | 4.72279        | NH1/14H    |
| 11.0247       | 2.2131        | 2.906552       | 2.378088       | NHMe/NH1   |
| 10.4396       | 3.3123        | 4.195369       | 3.432575       | NH2/18A    |
| 10.4337       | 3.4541        | 4.360875       | 3.567988       | NH2/18B    |
| 10.4337       | 4.4943        | 4.052497       | 3.315679       | NH2/15     |
| 10.4396       | 7.8097        | 2.458587       | 2.011571       | NH2/4      |
| 10.4337       | 8.4893        | 4.512979       | 3.692437       | NH2/14     |
| 8.643         | 2.2131        | 4.835988       | 3.956717       | CH3/7      |
| 7.9929        | 2.6622        | 5.035036       | 4.119575       | NHMe/11    |
| 7.9929        | 3.3064        | 3.807805       | 3.115477       | 11/18A     |
| 7.9929        | 3.4423        | 3.784294       | 3.09624        | 11/18B     |
| 7.9929        | 4.4884        | 3.582876       | 2.931444       | 11/15H     |
| 7.9929        | 6.7341        | 4.253833       | 3.480409       | 11/NH3     |
| 6.74          | 1.9176        | 4.278895       | 3.500914       | NH3/22     |
| 6.74          | 2.6681        | 2.862852       | 2.342334       | NH3/NHMe   |
| 6.7341        | 3.5546        | 3.986484       | 3.261669       | NH3/23A    |
| 6.7341        | 4.5356        | 3.343321       | 2.735445       | NH3/20     |
| 4.5534        | 1.9176        | 2.725229       | 2.229733       | 20/22      |
| 4.5534        | 2.3431        | 3.296262       | 2.696942       | 20/21      |
| 4.4943        | 2.1244        | 2.738926       | 2.240939       | 15/17A     |
| 4.4943        | 3.3241        | 2.918458       | 2.38783        | 15/18A/23  |
| 4.4943        | 3.5546        | 2.761679       | 2.259556       | 15/18B     |
| 3.5605        | 1.9117        | 3.00602        | 2.459471       | 23/22      |
| 3.4423        | 1.9057        | 3.284064       | 2.686962       | 18/17A/17B |
| 3.3123        | 1.888         | 2.624196       | 2.147069       | 22/23      |
| 3.4423        | 2.154         | 3.045297       | 2.491606       | 16/18      |
| 3.3123        | 2.148         | 3.18383        | 2.604952       | 16/18B     |
| 2.6681        | 1.9117        | 4.318525       | 3.533338       | NHMe/22    |
| 2.349         | 1.8939        | 2.270122       | 1.857372       | 22/21      |
